# Supplementary material for: Reduction of LPAR1 Expression in Neuroblastoma Promotes Tumor Cell Migration
Source: Cancers (Basel). 2022 Jul 9;14(14):3346. doi: 10.3390/cancers14143346 (PMC9322936; doi:10.3390/cancers14143346)
Supplement: Supplementary file 1 [file cancers-14-03346-s001.zip › supplementary Table S1.xls]

	logFC	AveExpr	t	P.Value	adj.P.Val	B
A1CF	-2.294870978	4.597759239	-15.60274431	8.03E-08	9.20E-07	8.786408336
A2ML1	-2.357433334	4.524773107	-21.03570227	5.84E-09	3.69E-07	11.37204207
A2MP1	-3.406494203	4.853583803	-15.63540298	7.89E-08	9.12E-07	8.804872569
A4GNT	-2.815596779	5.238710373	-10.29283984	2.82E-06	1.01E-05	5.087591419
AA06	-2.573646485	5.296693791	-14.74106122	1.32E-07	1.20E-06	8.283519236
AADAC	-2.539414518	4.737440699	-16.89551507	4.01E-08	6.40E-07	9.486541914
AADACP1	-2.939912053	3.925461657	-6.860172953	7.40E-05	0.000155018	1.602171867
AARS	-2.510829618	9.840728238	-4.28875592	0.002025004	0.002982904	-1.926685304
AASS	-2.887333516	4.779429282	-4.831960943	0.000932069	0.00147446	-1.104495778
AATK	-3.115369126	7.092533272	-17.00347831	3.79E-08	6.26E-07	9.542289834
ABCA1	-2.426046295	4.718235099	-14.08936848	1.95E-07	1.52E-06	7.881866413
ABCA4	-2.481640041	4.797531023	-13.91718351	2.16E-07	1.62E-06	7.77247702
ABCA7	-2.296292176	6.388355623	-9.748381751	4.43E-06	1.46E-05	4.608036197
ABCC11	-2.916381454	4.819604264	-21.73661683	4.37E-09	3.63E-07	11.64685816
ABCC12	-2.345809613	4.341433002	-17.99706895	2.31E-08	5.05E-07	10.03718116
ABCC2	-2.587508218	4.561320382	-11.77871559	9.04E-07	4.29E-06	6.285516578
ABCC6P1	-2.838001359	4.024714269	-19.37143945	1.21E-08	4.24E-07	10.67187253
ABCD1	-2.500347587	6.38546552	-7.418820987	4.03E-05	9.18E-05	2.253028401
ABCG2	-3.211246239	4.48279179	-8.806766491	1.02E-05	2.90E-05	3.719595719
ABCG8	-2.222067362	5.091768262	-13.51056849	2.80E-07	1.89E-06	7.508465692
ABHD1	-2.347009954	5.262503904	-14.0802736	1.96E-07	1.52E-06	7.876123467
ABHD11	-2.387230119	6.532279824	-10.37609578	2.63E-06	9.58E-06	5.15887698
ABHD14B	-4.021539955	7.141186489	-16.28969574	5.52E-08	7.50E-07	9.166122923
ABHD15	-2.53678346	5.915832127	-6.486766577	0.000113316	0.00022484	1.145634305
ABHD17C	-3.373010046	7.294125523	-4.448336918	0.001605096	0.002412834	-1.681004084
ABHD2	-2.267720311	7.200286439	-3.943358125	0.003390427	0.004774556	-2.469431096
ABHD4	-3.515487949	5.771623331	-18.30123424	1.99E-08	4.80E-07	10.18242729
ABHD8	-2.243450518	6.004797355	-7.104891788	5.64E-05	0.000122652	1.891903826
ABI3	-2.406603501	6.329850476	-9.988627929	3.62E-06	1.24E-05	4.822557022
ABLIM3	-2.494033733	5.623903565	-4.342089592	0.001872916	0.00277546	-1.844204536
ABR	-2.142939441	7.423674619	-4.249901678	0.002144072	0.003139758	-1.987004443
ABRACL	-3.446596891	8.48551371	-3.8808749	0.003728313	0.005212708	-2.569110293
ABTB2	-2.204789014	6.115089687	-9.437772175	5.79E-06	1.82E-05	4.323582469
ACADL	-2.450784897	4.534640181	-10.82060484	1.85E-06	7.31E-06	5.530742589
ACADSB	-2.113383891	6.289203222	-5.804302178	0.000258343	0.00046449	0.263811488
ACBD4	-2.268675708	6.866857879	-17.64289337	2.74E-08	5.50E-07	9.864437171
ACE2	-2.255026822	4.4422851	-8.110597774	1.99E-05	5.06E-05	3.009259895
ACKR1	-2.378487078	5.082860962	-14.24479679	1.77E-07	1.43E-06	7.979414697
ACKR2	-2.524673383	5.313525338	-17.45130591	3.02E-08	5.72E-07	9.769325975
ACKR3	-3.238709711	4.919035913	-7.573987998	3.42E-05	8.00E-05	2.427282776
ACKR4	-2.174561345	3.922688777	-6.727950441	8.59E-05	0.000176291	1.442540024
ACMSD	-2.483814537	3.782028492	-14.35410635	1.66E-07	1.37E-06	8.047350431
ACO1	-2.688639536	6.756047822	-6.112566427	0.000176728	0.00033214	0.669914866
ACOT8	-2.362348125	6.464256951	-13.18382125	3.45E-07	2.17E-06	7.290306941
ACOX2	-2.54997099	5.147827818	-11.00331012	1.61E-06	6.55E-06	5.679461466
ACP5	-2.831787234	5.64298539	-10.40468007	2.57E-06	9.41E-06	5.183230162
ACP6	-3.296137465	6.412158932	-6.257407573	0.000148486	0.000285407	0.856261749
ACPP	-2.207224778	4.248534318	-15.78939876	7.24E-08	8.69E-07	8.891372965
ACR	-2.328936282	5.058911675	-13.63192763	2.59E-07	1.80E-06	7.58811501
ACRV1	-2.629415015	4.936994705	-20.23390796	8.22E-09	3.85E-07	11.04345658
ACSBG1	-2.516051898	4.428594395	-13.69542553	2.49E-07	1.76E-06	7.629497947
ACSBG2	-2.593950288	5.296421121	-11.12176101	1.47E-06	6.13E-06	5.774636782
ACSF3	-2.200729222	5.655901065	-16.12481916	6.03E-08	7.83E-07	9.07661803
ACSL5	-2.809717697	5.498959392	-7.30417404	4.55E-05	0.000102152	2.122492952
ACSM1	-2.405057403	4.731852632	-18.32287791	1.97E-08	4.80E-07	10.19265564
ACSM3	-3.223993737	4.378960878	-13.366274	3.07E-07	2.00E-06	7.412799293
ACSM5	-2.623393932	4.770898306	-19.98452821	9.17E-09	3.94E-07	10.93800578
ACSS1	-2.261053009	5.560859898	-12.44840227	5.64E-07	3.07E-06	6.778504654
ACSS2	-2.120505418	7.693573827	-12.49337826	5.47E-07	3.00E-06	6.810666754
ACSS3	-2.329513717	4.190750567	-13.64738189	2.56E-07	1.79E-06	7.598205219
ACTA1	-2.847778661	4.703945847	-8.968947356	8.80E-06	2.56E-05	3.878301719
ACTA2-AS1	-2.177576243	4.888682294	-11.79456253	8.94E-07	4.25E-06	6.297496827
ACTC1	-2.565367339	6.673494689	-8.058115743	2.09E-05	5.29E-05	2.95371155
ACTL7A	-2.284401688	6.124869094	-9.425121997	5.86E-06	1.83E-05	4.311823126
ACTL8	-2.562084974	6.378705617	-13.65902189	2.54E-07	1.78E-06	7.605797259
ACTL9	-2.212709455	4.621815456	-9.251553884	6.82E-06	2.07E-05	4.149066017
ACTN1	-2.371052647	8.646139387	-5.021219704	0.000718476	0.001165132	-0.827648886
ACTN4	-3.52814128	9.372420447	-7.194682373	5.12E-05	0.000112673	1.996385933
ACTR1B	-2.30514945	8.669969504	-17.02724347	3.75E-08	6.23E-07	9.554507582
ACTR3BP2	-2.768957492	4.824127015	-15.54365374	8.30E-08	9.34E-07	8.752892938
ACTR3C	-2.462309981	5.312464268	-12.41900748	5.76E-07	3.11E-06	6.757421943
ACTRT2	-2.130888062	5.231842512	-7.763283711	2.82E-05	6.81E-05	2.636179196
ACTRT3	-2.404228054	5.333968669	-9.724743109	4.52E-06	1.48E-05	4.586673319
ACY3	-2.37026734	5.041546715	-13.4949035	2.82E-07	1.90E-06	7.498130868
ADAD1	-2.401504364	4.55739503	-20.53257775	7.23E-09	3.75E-07	11.16768974
ADAM11	-2.388477584	6.146767886	-10.90531535	1.74E-06	6.95E-06	5.599987242
ADAM15	-2.909199226	7.626711746	-8.483545262	1.38E-05	3.74E-05	3.395802481
ADAM19	-2.300408515	5.802306935	-6.431153542	0.000120919	0.000238148	1.076105542
ADAM20	-2.214663184	5.262252543	-19.39611345	1.19E-08	4.23E-07	10.68277705
ADAM21	-2.767253394	4.555648124	-17.01706574	3.77E-08	6.24E-07	9.549277535
ADAM28	-2.251727878	4.477514996	-9.477633705	5.59E-06	1.76E-05	4.360546477
ADAM5	-2.275547377	4.30573905	-19.63958486	1.07E-08	4.12E-07	10.78949688
ADAM6	-2.240347206	4.7981343	-10.01717489	3.53E-06	1.21E-05	4.847737324
ADAM8	-2.187442886	5.375546941	-13.25022649	3.30E-07	2.11E-06	7.335088589
ADAM9	-2.801792315	7.246624507	-6.714523211	8.72E-05	0.000178535	1.426206186
ADAMTS1	-2.564021351	7.675994781	-3.641361146	0.005391858	0.007329703	-2.954966986
ADAMTS12	-2.833427585	6.010986818	-5.118940106	0.000629401	0.001033709	-0.686692745
ADAMTS13	-2.166908996	6.382384889	-11.96327875	7.92E-07	3.89E-06	6.424080558
ADAMTS15	-3.12752052	5.500801826	-7.634431692	3.21E-05	7.60E-05	2.494420857
ADAMTS16	-2.38644741	5.288779404	-10.32973961	2.74E-06	9.89E-06	5.119250954
ADAMTS4	-2.329892285	5.486990062	-14.97854727	1.15E-07	1.11E-06	8.425216629
ADAMTS6	-2.815469269	4.337983414	-13.8152824	2.31E-07	1.69E-06	7.70707219
ADAMTSL1	-2.114737736	4.669044502	-7.652650493	3.15E-05	7.49E-05	2.514576872
ADAMTSL3	-3.09292445	4.867866535	-14.59743239	1.43E-07	1.25E-06	8.196634965
ADAMTSL4	-2.329740838	5.126154601	-16.34833718	5.35E-08	7.41E-07	9.197715105
ADAP1	-2.250773201	7.072223171	-7.728855944	2.92E-05	7.00E-05	2.598483561
ADAP2	-2.429784028	5.921524688	-14.61426761	1.42E-07	1.25E-06	8.206865905
ADARB2-AS1	-3.060235212	5.930036757	-18.30075767	1.99E-08	4.80E-07	10.18220191
ADAT3	-2.414601193	7.268896761	-8.953930648	8.92E-06	2.59E-05	3.86370997
ADCK1	-2.301713085	7.114412621	-10.34659121	2.70E-06	9.78E-06	5.133674866
ADCK5	-2.495299721	5.986409409	-10.44682254	2.49E-06	9.16E-06	5.219022315
ADCY10	-2.131733871	3.962525125	-16.751505	4.32E-08	6.63E-07	9.411553318
ADCY4	-2.402780047	6.674585903	-9.141270809	7.53E-06	2.25E-05	4.044265047
ADCY8	-2.122038986	4.818194074	-5.875931006	0.000236263	0.000428709	0.359340468
ADD3-AS1	-2.138818681	4.835755805	-18.7146024	1.64E-08	4.57E-07	10.37537458
ADGB	-2.930856153	4.051785971	-5.394010731	0.000436809	0.000744041	-0.297216621
ADH1A	-2.864390454	4.129812904	-17.59285888	2.81E-08	5.54E-07	9.839712599
ADH1C	-2.525226113	4.181693587	-6.673576391	9.14E-05	0.00018587	1.376254249
ADH6	-2.709962667	4.616147229	-13.61291876	2.62E-07	1.82E-06	7.575687751
ADH7	-4.042930005	4.971088973	-4.453115301	0.001594057	0.002397472	-1.673699502
ADHFE1	-2.338605312	6.797421836	-18.47955801	1.83E-08	4.67E-07	10.26628191
ADIG	-2.222484217	6.086095947	-12.27724365	6.35E-07	3.34E-06	6.655043525
ADIPOR1	-2.300159625	9.682981344	-8.600164418	1.24E-05	3.42E-05	3.513800072
ADIRF	-3.005648461	5.41423474	-4.634151766	0.001230279	0.001896209	-1.399229658
ADIRF-AS1	-2.991274041	5.669543125	-12.15970773	6.90E-07	3.53E-06	6.569269584
ADK	-2.235591836	8.677153288	-4.825121273	0.000940968	0.001487274	-1.114595504
ADM	-3.841718652	7.35511712	-8.561742989	1.28E-05	3.52E-05	3.475072397
ADM2	-2.282214852	6.958572312	-12.69463449	4.77E-07	2.72E-06	6.953180518
ADORA2A-AS1	-2.269811449	5.217781719	-17.9358292	2.38E-08	5.11E-07	10.00759391
ADORA2B	-3.861847859	7.795741719	-5.478153497	0.000391464	0.000673474	-0.180225929
ADORA3	-2.343561976	4.791839883	-19.26684716	1.27E-08	4.27E-07	10.62546412
ADPRH	-2.304409713	5.183600721	-15.99318385	6.48E-08	8.15E-07	9.004429086
ADRB1	-2.42404766	4.256136578	-10.04606584	3.45E-06	1.19E-05	4.873154964
ADRB2	-3.96547058	5.78554433	-7.843943456	2.59E-05	6.36E-05	2.723984616
ADRB3	-2.139287066	5.31647008	-13.85927201	2.24E-07	1.66E-06	7.735368134
ADSS	-2.475108301	6.688353005	-8.535784581	1.32E-05	3.59E-05	3.448825026
ADSSL1	-2.373852717	6.111604005	-5.720645013	0.000287007	0.00051011	0.151337863
ADTRP	-3.144345477	4.790828016	-13.84111022	2.27E-07	1.67E-06	7.723697054
AFAP1-AS1	-2.401953962	4.738600074	-12.1172068	7.10E-07	3.61E-06	6.538052022
AFAP1L1	-2.916149154	5.520231168	-9.504675761	5.46E-06	1.73E-05	4.385544985
AFAP1L2	-2.246087358	4.361299722	-16.40492822	5.19E-08	7.29E-07	9.228083485
AFF1	-2.148813122	6.281654702	-11.76252832	9.15E-07	4.32E-06	6.27326283
AFF2	-2.487078082	5.051539905	-15.33178673	9.35E-08	9.99E-07	8.631575302
AFM	-2.636797728	3.866268655	-16.1766611	5.86E-08	7.72E-07	9.104869747
AGBL2	-2.906353508	4.563091778	-3.648966848	0.005328457	0.007253154	-2.942629079
AGFG2	-2.2158843	5.538654926	-17.29401303	3.27E-08	5.93E-07	9.690344511
AGMAT	-2.277037909	4.902109114	-8.358627664	1.56E-05	4.14E-05	3.267908435
AGPAT2	-2.658550487	7.38358909	-9.631054198	4.90E-06	1.58E-05	4.501546261
AGPAT3	-3.260561562	6.59918563	-7.11486994	5.58E-05	0.000121622	1.903562436
AGPAT9	-4.439881773	4.693230245	-22.11146915	3.75E-09	3.61E-07	11.78931812
AGR2	-4.555517336	5.109056618	-4.187804221	0.002350125	0.003414858	-2.083805503
AGRN	-2.975057664	7.187125523	-8.287436606	1.67E-05	4.38E-05	3.194316472
AGT	-2.742104614	5.419654424	-17.19436002	3.44E-08	6.00E-07	9.639881717
AGTR2	-2.297057711	4.300165124	-19.59918206	1.09E-08	4.12E-07	10.77189722
AGTRAP	-2.714110359	7.069866634	-21.42959254	4.95E-09	3.68E-07	11.52785854
AGXT	-2.12380183	4.759523084	-14.56008588	1.46E-07	1.27E-06	8.173894302
AGXT2	-3.00930995	4.923339211	-14.15543691	1.87E-07	1.48E-06	7.923468919
AHCYL2	-2.598880415	6.702993708	-8.776488616	1.05E-05	2.96E-05	3.689692063
AHDC1	-2.10304048	5.5842237	-13.77261447	2.37E-07	1.71E-06	7.679536811
AHNAK	-2.280475867	6.760595037	-7.204315041	5.07E-05	0.00011171	2.007537399
AHNAK2	-3.678185587	5.414749499	-8.123385348	1.96E-05	5.01E-05	3.022750737
AHR	-6.165826135	5.013780971	-8.840921677	9.89E-06	2.82E-05	3.753224449
AHRR	-2.669121102	5.709436474	-4.505209674	0.001478833	0.002240315	-1.594263196
AHSG	-2.452458992	4.880652906	-18.69730796	1.65E-08	4.58E-07	10.3674025
AHSP	-2.270429438	5.280080936	-7.552257665	3.50E-05	8.16E-05	2.40304483
AICDA	-2.433231693	3.944465649	-17.52203442	2.92E-08	5.64E-07	9.804576682
AIF1	-2.420466244	5.846887748	-14.15348408	1.87E-07	1.48E-06	7.922242167
AIF1L	-2.192008425	6.327961762	-5.140108934	0.000611721	0.001007502	-0.656336949
AIFM2	-2.68171751	6.53350041	-5.440448267	0.00041112	0.000703387	-0.232526527
AIG1	-2.132315342	5.706406386	-3.660532991	0.005233539	0.007131068	-2.923876598
AIM1	-4.406162517	4.86165994	-6.01564573	0.000198867	0.000368235	0.543636482
AIM1L	-2.243592677	5.827943674	-15.23536094	9.88E-08	1.03E-06	8.575757462
AIPL1	-2.168694612	5.285271058	-16.43624864	5.10E-08	7.23E-07	9.244840855
AJUBA	-3.330477255	6.111077516	-7.266730403	4.74E-05	0.000105652	2.079526772
AK024134 /// PPM1H	-2.625528311	4.73864723	-10.83589934	1.83E-06	7.24E-06	5.543282331
AK7	-2.727645289	5.533163987	-7.432615546	3.97E-05	9.06E-05	2.268631761
AK8	-2.268296386	6.895199436	-10.80172552	1.88E-06	7.40E-06	5.515240744
AK9	-2.862342939	5.190996972	-8.130649759	1.95E-05	4.98E-05	3.030407036
AKAP3	-2.486740571	5.30625825	-11.64337153	9.98E-07	4.60E-06	6.182553494
AKNA	-2.742829588	5.689341654	-11.67146846	9.77E-07	4.52E-06	6.204023503
AKR1B10	-4.288706673	4.82298987	-5.35550791	0.000459427	0.000779195	-0.351085352
AKR1C1	-2.293956004	5.994240182	-4.666649287	0.001174974	0.001818503	-1.350435007
AKR1C4	-2.118827112	3.617459225	-15.50835872	8.47E-08	9.40E-07	8.732807791
AKR7A2	-2.367188483	9.313623378	-13.96904521	2.10E-07	1.59E-06	7.805572943
AKR7A3	-3.358048005	7.112886172	-19.93792704	9.36E-09	3.99E-07	10.91812373
AKT1S1	-2.155700447	6.518424058	-3.746579195	0.004580932	0.006312048	-2.784760106
AKTIP	-2.455632207	7.785098222	-14.10363043	1.93E-07	1.51E-06	7.890864275
ALAD	-2.19224548	6.905800703	-11.83885013	8.66E-07	4.16E-06	6.330895131
ALDH16A1	-2.319125882	7.593298001	-11.18104498	1.41E-06	5.94E-06	5.821910695
ALDH1A3	-3.627375673	6.115655007	-6.56354583	0.000103663	0.000207864	1.240964202
ALDH1B1	-2.326105285	7.236898829	-5.46874044	0.000396274	0.000680948	-0.193263836
ALDH3A2	-2.219003905	8.415340238	-6.592375888	0.000100273	0.000201816	1.276563004
ALDH3B1	-3.312702954	6.741758349	-7.275174871	4.69E-05	0.000104835	2.089231139
ALDH3B2	-3.024396033	4.24167504	-6.068684324	0.000186401	0.000347731	0.612898965
ALDH4A1	-2.213948921	6.700028236	-5.468198571	0.000396552	0.000681312	-0.194014754
ALG1	-2.353732414	7.507923948	-9.372152637	6.13E-06	1.91E-05	4.26243297
ALKBH3	-2.118599001	8.037223239	-6.098251839	0.000179822	0.000336964	0.651344669
ALKBH3-AS1	-2.127603519	4.290635999	-15.21458589	1.00E-07	1.03E-06	8.563681438
ALKBH5	-2.530422446	8.244496745	-15.24117542	9.85E-08	1.02E-06	8.579134093
ALMS1P	-2.347731826	5.180471385	-11.71318368	9.48E-07	4.43E-06	6.235807478
ALOX12	-3.38601292	4.797772004	-27.1024651	6.17E-10	3.61E-07	13.42969094
ALOX12B	-2.324889858	4.578853726	-12.77309551	4.53E-07	2.63E-06	7.008127262
ALOX12P2	-2.244468867	5.701993901	-12.566156	5.21E-07	2.90E-06	6.86246571
ALOX15	-4.642097702	4.970747362	-3.805646582	0.004182997	0.00580636	-2.68968097
ALOX15B	-2.860162246	4.9410512	-16.21863741	5.73E-08	7.64E-07	9.127671796
ALOX5	-2.309593981	4.543975409	-10.16656381	3.12E-06	1.10E-05	4.97845578
ALOX5AP	-2.768565393	5.479998957	-11.21680259	1.37E-06	5.82E-06	5.850309097
ALOXE3	-2.346683869	4.851557211	-12.77467091	4.52E-07	2.63E-06	7.009227047
ALPK1	-2.270588609	5.478928154	-14.88380479	1.21E-07	1.14E-06	8.368978183
ALPK2	-2.496180525	5.07701753	-3.795968051	0.004245617	0.005886093	-2.705236019
ALPP	-2.519957866	4.605855016	-11.70727634	9.52E-07	4.45E-06	6.231313197
ALPPL2	-2.189587009	6.397559352	-10.07365375	3.37E-06	1.17E-05	4.897364436
ALS2CL	-2.539276918	6.374180148	-12.38433654	5.90E-07	3.17E-06	6.732491096
ALS2CR12	-2.484715788	4.436738449	-10.37927248	2.63E-06	9.57E-06	5.161586513
AMBN	-2.40529756	5.259438086	-13.12002439	3.60E-07	2.23E-06	7.247067082
AMBP	-2.145405674	5.295848823	-12.29143651	6.29E-07	3.32E-06	6.665345983
AMELY	-2.645931423	4.874470359	-19.07309163	1.38E-08	4.35E-07	10.5386967
AMFR	-3.598971996	6.991445572	-5.018155008	0.000721481	0.001169449	-0.832091492
AMHR2	-2.273755958	5.975865262	-8.559354342	1.29E-05	3.53E-05	3.47265993
AMIGO2	-5.464979135	6.118993755	-4.172874672	0.002402744	0.003484635	-2.107150673
AMOT	-3.006266104	4.71146112	-4.845887461	0.000914226	0.001449933	-1.083951674
AMPD1	-2.394161425	4.48136854	-16.79128772	4.23E-08	6.57E-07	9.432341109
ANAPC2	-2.434368587	7.569623466	-7.111958006	5.60E-05	0.000121891	1.900161334
ANG	-3.719513061	5.333877164	-10.90866005	1.73E-06	6.94E-06	5.602710898
ANGPTL6	-2.380395104	5.592356035	-8.508976927	1.35E-05	3.67E-05	3.421649194
ANKEF1	-2.389755204	5.107505869	-5.421855485	0.000421204	0.000719496	-0.258390592
ANKFN1	-2.132518728	4.835360112	-14.15780452	1.87E-07	1.48E-06	7.924955994
ANKMY1	-2.334548222	5.501345983	-11.20575974	1.38E-06	5.86E-06	5.841548174
ANKRD1	-2.623832007	4.167571693	-5.29124611	0.000500048	0.000841548	-0.441462451
ANKRD18A	-2.783940095	4.483440078	-7.751514416	2.85E-05	6.87E-05	2.623307494
ANKRD2	-2.74868768	5.13044465	-8.282834977	1.68E-05	4.40E-05	3.189541881
ANKRD22	-3.028576089	5.241674356	-7.506159512	3.67E-05	8.50E-05	2.35144938
ANKRD26P3	-2.174802216	4.598478186	-13.56487746	2.70E-07	1.85E-06	7.544200139
ANKRD29	-2.285535473	3.587801454	-14.81693492	1.26E-07	1.16E-06	8.329053486
ANKRD33	-2.357158409	4.50597723	-11.03687608	1.57E-06	6.43E-06	5.706529915
ANKRD34A	-2.764431537	5.87230105	-14.33089792	1.68E-07	1.38E-06	8.032972121
ANKRD34C	-2.378612998	4.300168393	-16.52967058	4.86E-08	7.05E-07	9.294613853
ANKRD35	-3.578042908	5.207173776	-8.857287886	9.75E-06	2.79E-05	3.769299354
ANKRD55	-2.88260286	4.49445322	-22.03187991	3.88E-09	3.61E-07	11.75932662
ANKRD6	-2.771035956	5.176344314	-3.965889109	0.003276677	0.004626469	-2.43359425
ANKS4B	-2.778684367	5.018738778	-20.53413986	7.22E-09	3.75E-07	11.1683337
ANKUB1	-2.375538626	4.446414958	-11.47880753	1.13E-06	5.02E-06	6.055787895
ANO10	-2.570304172	7.780160514	-6.676400725	9.11E-05	0.000185401	1.379706565
ANO2	-2.269222282	4.821812668	-15.1061186	1.06E-07	1.07E-06	8.500341744
ANO3	-2.172996887	4.367833512	-6.135566152	0.000171878	0.000324305	0.699694124
ANO7	-2.247099484	7.147346752	-16.37199294	5.28E-08	7.37E-07	9.210423668
ANO9	-2.313297663	5.610629232	-9.485097465	5.56E-06	1.75E-05	4.367452482
ANP32C	-2.29910497	5.101973908	-10.76082914	1.94E-06	7.57E-06	5.48157334
ANPEP	-2.222401734	4.521283366	-15.58706827	8.10E-08	9.23E-07	8.777530594
ANXA1	-5.149035623	4.917816844	-7.226632218	4.95E-05	0.000109582	2.033330928
ANXA10	-4.13257661	4.472721627	-6.751331157	8.36E-05	0.000172336	1.470927543
ANXA11	-3.210668275	7.252454624	-7.460584247	3.85E-05	8.85E-05	2.300200457
ANXA13	-2.845350919	5.362852747	-11.5676909	1.05E-06	4.80E-06	6.124472262
ANXA2P1	-2.801126836	5.943608925	-7.642816771	3.19E-05	7.55E-05	2.503702148
ANXA2P2	-2.744552058	10.35672861	-4.389319813	0.001748396	0.002606414	-1.771472696
ANXA2P3	-2.825096139	6.62311426	-11.79817164	8.92E-07	4.25E-06	6.300223115
ANXA3	-5.365740663	5.244601572	-6.94584362	6.72E-05	0.000142636	1.704437232
ANXA4	-3.775743934	7.802834069	-3.764504541	0.004456111	0.006152074	-2.75586911
ANXA9	-2.68688791	5.077504624	-11.97889486	7.83E-07	3.87E-06	6.435708497
AOAH	-2.632608064	5.641989951	-18.67981326	1.66E-08	4.58E-07	10.35932929
AOC1	-2.446508029	4.385385386	-19.85317592	9.72E-09	4.03E-07	10.8818211
AOC2	-2.701973735	5.030811335	-7.043418483	6.04E-05	0.000129884	1.819811968
AOC3	-2.66071446	4.322923474	-12.12916777	7.05E-07	3.59E-06	6.546848437
AOX1	-3.462914733	5.28856754	-5.862775961	0.000240159	0.000435085	0.341849299
AP1G2	-2.295117064	6.259632634	-6.493089979	0.000112485	0.000223386	1.153514425
AP1M2	-3.547471127	6.301653377	-7.173714633	5.24E-05	0.000114915	1.972073909
AP1S3	-2.834777683	4.900998244	-8.389797776	1.51E-05	4.03E-05	3.299967995
AP2A1	-2.511022718	6.518122521	-7.702695122	3.00E-05	7.17E-05	2.569751813
AP2B1	-2.259004387	9.141700216	-7.151951539	5.36E-05	0.000117384	1.946784075
AP5B1	-2.357257717	5.175636527	-8.300650236	1.65E-05	4.34E-05	3.208014737
AP5S1	-2.413606122	7.166407634	-11.55884579	1.06E-06	4.83E-06	6.117660098
APBB1IP	-2.916406591	4.477462283	-15.04397911	1.10E-07	1.09E-06	8.463834143
APBB2	-2.118913996	6.007460365	-6.884210232	7.20E-05	0.00015148	1.63095707
APEH	-2.467099405	7.020602785	-9.223860599	6.99E-06	2.11E-05	4.122851679
APH1B	-2.306381733	6.827867244	-9.324845002	6.39E-06	1.97E-05	4.218114837
APLN	-2.183156404	6.620895639	-7.079422551	5.80E-05	0.000125662	1.862090711
APLP2	-2.844784943	9.036107071	-10.29117966	2.82E-06	1.01E-05	5.086164558
APOA2	-2.148944762	4.333605999	-17.99145086	2.31E-08	5.05E-07	10.0344717
APOA4	-2.21678414	6.583367753	-6.550615915	0.000105224	0.000210581	1.224963762
APOA5	-2.254533602	6.047387109	-17.73870609	2.62E-08	5.41E-07	9.911559433
APOB	-2.27976591	4.427675447	-17.86120867	2.46E-08	5.21E-07	9.971383914
APOBEC3B	-4.130704967	5.845681941	-3.901885379	0.003610883	0.005060723	-2.535544406
APOBEC3C	-2.684638302	6.368343158	-6.221670676	0.000154965	0.000296413	0.810545915
APOBEC3D	-2.850986997	5.546407154	-22.93843554	2.71E-09	3.61E-07	12.09304204
APOBEC4	-3.70955548	5.156466373	-6.334504956	0.000135489	0.000263621	0.954307448
APOBR	-2.344578884	4.887054596	-19.10868462	1.36E-08	4.33E-07	10.55471412
APOD	-3.345614118	5.47937659	-7.687091526	3.04E-05	7.27E-05	2.552578584
APOL1	-3.231226134	6.319680987	-8.551909309	1.30E-05	3.55E-05	3.465137054
APOL2	-2.329087368	6.925040987	-9.996112041	3.60E-06	1.23E-05	4.829164793
APOL4	-2.356733141	5.296841256	-17.29365964	3.27E-08	5.93E-07	9.690166146
APOL5	-2.496840312	5.349255521	-10.94519134	1.68E-06	6.78E-06	5.632407863
APOL6	-2.832084608	4.523292497	-10.04415696	3.46E-06	1.19E-05	4.871477623
APOM	-2.50872209	6.071702251	-13.3946741	3.01E-07	1.98E-06	7.431711995
APPL2	-2.356738131	7.637937048	-4.531652363	0.001423787	0.00216784	-1.554082102
APRT	-2.35897665	9.187123617	-5.794977247	0.000261378	0.000469535	0.251322767
AQP5	-3.794556254	5.979055632	-5.875992473	0.000236245	0.000428709	0.359422139
AQP6	-2.239107832	5.982621492	-11.58172428	1.04E-06	4.76E-06	6.135269917
AQP8	-2.163043824	5.131310944	-12.95557703	4.01E-07	2.41E-06	7.134615402
AQP9	-2.921939686	5.647747332	-13.85455981	2.25E-07	1.66E-06	7.732341519
AQPEP	-2.316390325	3.700213405	-19.71328102	1.03E-08	4.10E-07	10.82148767
AR	-2.47856489	5.036865614	-18.35483965	1.94E-08	4.75E-07	10.2077344
ARCN1	-2.206867459	10.33813851	-7.927752695	2.38E-05	5.90E-05	2.814467596
ARF6	-2.195336479	9.306430724	-11.2239568	1.36E-06	5.80E-06	5.855980551
ARFIP2	-2.558621022	9.201487712	-6.100547729	0.000179322	0.000336242	0.654324978
ARHGAP1	-2.279269588	6.773415341	-9.821442052	4.16E-06	1.39E-05	4.673771152
ARHGAP18	-5.282194943	5.834225526	-7.827452898	2.64E-05	6.45E-05	2.706091078
ARHGAP20	-2.689925267	5.163628662	-18.29445364	2.00E-08	4.80E-07	10.17922002
ARHGAP24	-2.55531816	4.782390131	-19.4211868	1.18E-08	4.23E-07	10.69384113
ARHGAP25	-3.137828573	5.342250702	-15.51203332	8.45E-08	9.40E-07	8.734901195
ARHGAP26-AS1	-2.154316237	4.548205245	-16.97554234	3.85E-08	6.29E-07	9.527903175
ARHGAP32	-2.432065673	5.648405949	-4.054768335	0.002865925	0.004090837	-2.292795457
ARHGAP39	-3.765238641	5.344215686	-12.73522608	4.64E-07	2.67E-06	6.981649571
ARHGAP44	-2.89944092	5.61303664	-12.09991141	7.19E-07	3.64E-06	6.525317397
ARHGDIB	-3.290225282	6.187627292	-8.671476044	1.16E-05	3.22E-05	3.585298401
ARHGEF15	-2.383923244	5.889360146	-11.99763669	7.73E-07	3.83E-06	6.449644261
ARHGEF18	-2.664410975	8.551200594	-8.466804265	1.41E-05	3.79E-05	3.378753201
ARHGEF19	-2.152887451	6.507634386	-11.11793728	1.47E-06	6.14E-06	5.771579469
ARHGEF26	-2.565839012	5.071057553	-4.164565224	0.002432573	0.003523898	-2.120156062
ARHGEF26-AS1	-2.259049247	3.6376624	-11.56745029	1.05E-06	4.80E-06	6.124287025
ARHGEF37	-2.296076594	5.692289043	-6.555356136	0.000104648	0.000209573	1.230832173
ARHGEF38	-2.775757096	5.098360415	-15.3648656	9.18E-08	9.88E-07	8.650636111
ARHGEF5	-3.339548832	5.472458851	-10.24276333	2.94E-06	1.05E-05	5.044459516
ARHGEF7-IT1	-2.723335248	4.090202991	-25.31731143	1.13E-09	3.61E-07	12.89292787
ARID5A	-2.431626377	6.301395107	-8.536856173	1.31E-05	3.59E-05	3.44990986
ARID5B	-2.400747071	5.105027542	-9.336610315	6.33E-06	1.95E-05	4.229155004
ARL4A	-2.708384326	7.94285443	-6.93986606	6.77E-05	0.000143452	1.697331254
ARL4C	-2.545354183	6.926903508	-4.694674149	0.00112942	0.001755169	-1.308473385
ARL5C	-2.136044625	6.099909609	-16.9836368	3.83E-08	6.28E-07	9.532074464
ARMC2	-3.276523077	4.334459412	-6.028499974	0.000195765	0.000363114	0.560457906
ARMC3	-3.985513361	4.547708035	-4.627226167	0.001242423	0.001912764	-1.409647206
ARMC4	-4.004259408	5.45231315	-11.1621354	1.43E-06	6.00E-06	5.806857867
ARMCX1	2.498187923	8.300613353	4.972913964	0.000767449	0.001237682	-0.897828342
ARNTL2	-2.912805591	6.78928668	-5.305326142	0.000490827	0.00082751	-0.421610198
ARPC1B	-2.697836895	9.715538204	-3.748900639	0.004564561	0.006290762	-2.781016749
ARPC4	-2.536251254	8.793882233	-6.816715408	7.77E-05	0.000161672	1.549947659
ARRB2	-2.178091031	7.705071446	-3.576665449	0.005964313	0.00804725	-3.060121205
ARRDC1	-2.774551186	5.711195977	-12.87675579	4.22E-07	2.50E-06	7.080202194
ARRDC2	-2.227742845	6.90844572	-8.402909096	1.49E-05	3.99E-05	3.313424179
ARRDC3-AS1	-2.912749984	5.929139342	-24.2379147	1.66E-09	3.61E-07	12.54282909
ARSA	-2.435356381	6.050630461	-17.67137586	2.71E-08	5.49E-07	9.878475937
ARSD	-2.76318367	5.801318402	-6.127041998	0.000173658	0.000327273	0.688665685
ARSI	-3.440052365	5.646333602	-6.532690023	0.00010743	0.000214493	1.202745163
ARSJ	-3.663106239	5.47758889	-4.608381329	0.00127612	0.001961102	-1.438027213
ARSK	-2.514620335	5.969949007	-8.611577045	1.23E-05	3.39E-05	3.525275844
ART5	-2.915972262	6.550460333	-14.58373853	1.44E-07	1.26E-06	8.18830382
ARTN	-2.19616554	6.037255609	-9.343625605	6.29E-06	1.94E-05	4.235732127
ARX	-2.259658067	5.278587772	-9.510511038	5.44E-06	1.72E-05	4.390931065
ASAH2B	-2.131338184	6.478943951	-6.433879166	0.000120534	0.000237457	1.079522607
ASAP3	-2.115934431	6.298897494	-7.952442685	2.33E-05	5.78E-05	2.840979016
ASB11	-2.470657332	4.073243596	-13.7467453	2.41E-07	1.73E-06	7.662799212
ASB12	-2.962027805	6.151646678	-8.804928844	1.02E-05	2.90E-05	3.717783266
ASB16	-3.686655845	6.710087777	-13.92723877	2.15E-07	1.61E-06	7.778903899
ASB16-AS1	-2.590501956	6.083766843	-7.843531019	2.59E-05	6.36E-05	2.723537451
ASB3 /// AX747197	-2.865317273	5.0689597	-24.60679849	1.46E-09	3.61E-07	12.66477497
ASB9	-2.36533459	4.773383635	-4.413633263	0.001687769	0.002522837	-1.734146022
ASCL1	3.551581428	8.524340173	4.293550206	0.002010808	0.002963913	-1.919255858
ASCL3	-3.255422451	5.49230598	-14.48460327	1.53E-07	1.31E-06	8.127742667
ASIC1	-2.501762018	6.994685496	-5.697703073	0.000295458	0.000523357	0.120322695
ASIC2	-2.841362822	4.953942526	-11.39468719	1.20E-06	5.24E-06	5.990310628
ASIC5	-2.773377214	4.124848135	-24.13880202	1.73E-09	3.61E-07	12.50964525
ASMTL	-2.19388711	7.468678974	-9.084166972	7.93E-06	2.34E-05	3.989569252
ASMTL-AS1	-2.441696572	5.978210233	-10.64068195	2.13E-06	8.13E-06	5.381967027
ASPA	-2.350557723	4.66691183	-16.85175293	4.10E-08	6.46E-07	9.463830449
ASPG	-2.31676157	5.710154118	-9.336872315	6.33E-06	1.95E-05	4.229400717
ASPH	-2.559459923	6.636041807	-8.611069475	1.23E-05	3.39E-05	3.524765735
ATF3	-2.553878304	6.653117952	-6.403101626	0.000124964	0.000245381	1.040880731
ATF7IP2	-2.181673731	6.938575797	-3.597674273	0.005771724	0.007804092	-3.025934599
ATG13	-2.184009383	7.9999263	-9.194162977	7.18E-06	2.16E-05	4.094663985
ATG2A	-2.225860888	7.799936223	-7.480047878	3.78E-05	8.70E-05	2.322116248
ATG4A	-2.405848088	7.602555356	-4.985037875	0.000754828	0.001218866	-0.880183381
ATG9A	-2.341413704	8.225601289	-5.024125506	0.00071564	0.001161089	-0.823437848
ATL3	-2.524522346	6.586891298	-4.827147853	0.000938322	0.001483549	-1.111602291
ATP10A	-2.194004203	5.899524323	-13.66704788	2.53E-07	1.78E-06	7.611028219
ATP10B	-2.521295174	5.252707296	-8.591204469	1.25E-05	3.44E-05	3.504781632
ATP10D	-2.701930518	7.642161446	-5.232480201	0.000540608	0.00090119	-0.52462456
ATP12A	-4.303126299	6.510185316	-4.548593106	0.001389677	0.002119374	-1.5283896
ATP13A2	-2.90973096	6.875406827	-12.96233302	3.99E-07	2.40E-06	7.139263714
ATP13A4	-2.422524912	4.391758041	-19.63940412	1.07E-08	4.12E-07	10.78941825
ATP1B2	-2.684865329	5.864086087	-11.76451682	9.14E-07	4.32E-06	6.274769008
ATP1B4	-2.115938944	3.792115707	-14.79646965	1.27E-07	1.17E-06	8.31679618
ATP2A1	-2.299162318	4.923393951	-11.91380873	8.21E-07	4.00E-06	6.387146188
ATP2B4	-3.924221853	6.9072262	-8.416961081	1.47E-05	3.94E-05	3.327826581
ATP2C2	-2.264115344	5.300612032	-8.143784656	1.92E-05	4.92E-05	3.044236503
ATP4A	-2.439162392	4.91901896	-20.72508284	6.65E-09	3.75E-07	11.24659856
ATP4B	-2.158432612	5.116740276	-11.67120771	9.77E-07	4.52E-06	6.203824483
ATP6AP1L	-2.203929857	4.925862234	-11.4254954	1.17E-06	5.15E-06	6.014344781
ATP6V0D1	-2.352210496	9.963726306	-7.651529282	3.16E-05	7.49E-05	2.513337517
ATP6V0D2	-2.756144022	5.09556196	-19.22281378	1.29E-08	4.29E-07	10.6058364
ATP6V1C2	-2.662896353	4.686307101	-20.5471052	7.18E-09	3.75E-07	11.17367617
ATP6V1D	-2.174546426	7.722945504	-14.05870107	1.98E-07	1.54E-06	7.862485997
ATP7B	-2.981114135	6.848335172	-4.888448746	0.000861935	0.001374567	-1.021335533
ATP8A2	-2.148363452	4.606693177	-11.37602376	1.21E-06	5.30E-06	5.975720506
ATP8B1	-3.259951415	6.49934084	-4.396650458	0.001729875	0.002580685	-1.76021025
ATP8B3	-2.123458136	4.740959799	-8.925883011	9.15E-06	2.65E-05	3.836399969
ATP9B	-2.141601972	5.37841713	-13.96430676	2.10E-07	1.59E-06	7.80255439
AVPI1	-3.229290568	7.725461417	-12.63179638	4.98E-07	2.81E-06	6.908927977
AVPR2	-2.517661477	5.353570311	-10.42064041	2.54E-06	9.33E-06	5.196801204
AWAT1	-2.720218084	4.729999091	-14.55787678	1.47E-07	1.27E-06	8.172547218
AXL	-3.766397936	6.064667364	-4.594774569	0.00130106	0.00199628	-1.458549106
AZGP1	-2.251727787	4.211653069	-7.727459936	2.92E-05	7.01E-05	2.596952279
AZIN2	-2.497338015	6.457211705	-15.37663909	9.12E-08	9.83E-07	8.657409539
AZU1	-3.086419017	5.035046542	-14.69549571	1.35E-07	1.21E-06	8.256053606
B3GALT1	-2.100620186	4.279833472	-13.70864569	2.47E-07	1.75E-06	7.638088823
B3GALT4	-2.317219527	5.129078989	-14.44071948	1.57E-07	1.33E-06	8.100793948
B3GALT5	-2.303268729	5.008604878	-19.00929441	1.43E-08	4.39E-07	10.50989814
B3GAT3	-2.143575608	7.236014809	-10.20728431	3.02E-06	1.07E-05	5.013783737
B3GNT3	-2.147270278	6.657949862	-5.303504685	0.000492009	0.000829366	-0.424176787
B3GNT7	-2.357359698	4.837147569	-8.114226886	1.98E-05	5.05E-05	3.013090335
B4GALNT2	-2.416832565	4.981762642	-18.77282357	1.59E-08	4.51E-07	10.40214884
B4GALNT3	-2.99190114	5.715577351	-16.16988939	5.88E-08	7.73E-07	9.101185134
B4GALT1	-2.22673654	5.344681625	-13.64849158	2.56E-07	1.79E-06	7.598929285
B4GALT4	-2.14506093	7.874586535	-4.671818441	0.001166425	0.001806913	-1.342687045
B4GALT7	-2.16222194	7.137644359	-13.9184897	2.16E-07	1.62E-06	7.773312154
B9D1	-3.137112669	6.799633538	-15.24768365	9.81E-08	1.02E-06	8.58291195
BAALCOS	-2.681083186	5.111211729	-14.32772734	1.68E-07	1.38E-06	8.031005948
BACE2	-4.415538027	5.647121625	-6.060207479	0.000188335	0.000351019	0.601854881
BAG3	-3.163699015	9.216995987	-3.675472387	0.005113564	0.00698294	-2.899673074
BAIAP2	-2.336796364	6.439416446	-6.103496735	0.000178681	0.000335319	0.658152052
BAIAP2L1	-4.458942159	5.815284564	-12.46447105	5.58E-07	3.04E-06	6.790008643
BAIAP3	-2.282542428	6.5170118	-10.33634278	2.72E-06	9.85E-06	5.12490543
BAK1	-2.909959729	7.341149195	-10.61380304	2.18E-06	8.25E-06	5.359539904
BANCR	-2.341833597	5.048828164	-9.445847505	5.75E-06	1.81E-05	4.331081885
BANF2	-2.298676124	4.317929391	-15.61658386	7.97E-08	9.16E-07	8.794237946
BANK1	-2.565816795	4.555087158	-18.93239088	1.48E-08	4.42E-07	10.47503096
BAP1	-2.49047464	8.222194418	-6.628375984	9.62E-05	0.000194461	1.320865135
BARHL1	-2.285069827	6.850377036	-7.294679744	4.60E-05	0.000102982	2.111613968
BARX1	-2.111121628	5.146936472	-10.77219989	1.92E-06	7.53E-06	5.490946181
BARX1-AS1	-2.375521005	5.258148378	-15.12044004	1.06E-07	1.07E-06	8.508732819
BBOX1	-3.308788735	4.459457172	-4.624898276	0.001246533	0.001918948	-1.413150326
BBS1	-2.58707114	6.370108082	-10.03005051	3.50E-06	1.20E-05	4.859073211
BBS12	-2.916495045	6.227533884	-4.814581265	0.000954863	0.001507041	-1.130172171
BBS5	-2.708016537	4.894157073	-5.78363872	0.000265122	0.000475592	0.23612098
BBS9	-2.319089481	5.45529318	-9.26921351	6.72E-06	2.05E-05	4.165746925
BC031864 /// LOC100507330 /// RP11-588H23.3	-2.320580278	5.21162215	-15.49621233	8.53E-08	9.42E-07	8.725884201
BC036778 /// NCOA3	-2.124732238	6.215862498	-7.672476373	3.09E-05	7.36E-05	2.536468627
BC039485 /// LOC284930	-2.395058598	4.937111698	-15.0134626	1.12E-07	1.10E-06	8.445845964
BC048103 /// CSGALNACT1	-2.380564436	4.592640277	-7.38313739	4.18E-05	9.50E-05	2.212563617
BCAM	-2.641855309	6.200467149	-7.105896276	5.64E-05	0.000122544	1.893078027
BCAR1	-2.244195143	6.023076457	-10.46845459	2.45E-06	9.05E-06	5.237342953
BCAR4	-2.276561112	4.645023662	-10.99583803	1.62E-06	6.58E-06	5.673425153
BCAS1	-2.744988483	5.435659375	-6.521872695	0.000108786	0.000216988	1.189317279
BCAS3	-3.014828948	7.006425507	-9.38816013	6.05E-06	1.88E-05	4.277384574
BCAS4	-2.202031733	5.804099607	-12.24768767	6.48E-07	3.38E-06	6.633551211
BCKDK	-2.416145604	8.08050734	-10.37196212	2.64E-06	9.61E-06	5.155350082
BCL2A1	-2.359410697	3.94699005	-5.861316713	0.000240595	0.00043576	0.339907582
BCL2L1	-2.623012648	6.865233319	-5.152751626	0.000601418	0.00099213	-0.63823794
BCL2L12	-2.883372487	7.814018316	-5.230154553	0.000542285	0.000903566	-0.527925797
BCL2L14	-2.148869842	4.375553421	-19.68752947	1.05E-08	4.12E-07	10.81032551
BCL2L15	-2.567690066	5.14002436	-9.130070659	7.61E-06	2.26E-05	4.033560496
BCL6	-3.400614992	5.728045896	-7.066935914	5.88E-05	0.000127123	1.847445756
BCL9L	-3.508265952	6.439657108	-8.041282621	2.13E-05	5.36E-05	2.935833384
BCO2	-2.782572473	4.867943591	-10.73915969	1.97E-06	7.68E-06	5.463685658
BCR	-2.498760326	7.755553938	-9.374781014	6.12E-06	1.90E-05	4.264889508
BEAN1	-2.359451858	4.285723389	-20.36854994	7.76E-09	3.81E-07	11.09973641
BEND7	-2.389286668	5.525870944	-7.492696847	3.73E-05	8.61E-05	2.336335519
BEST2	-2.519165849	5.4207872	-14.6932957	1.35E-07	1.21E-06	8.254725205
BET1L	-2.583348428	6.741048005	-10.93679459	1.69E-06	6.81E-06	5.625590263
BEX5	-3.784739515	4.971158293	-7.023597745	6.17E-05	0.000132413	1.796469686
BGLT3	-3.238200936	5.843024945	-18.97919491	1.45E-08	4.41E-07	10.49627126
BHLHE40	-4.698813501	5.875897512	-8.755978625	1.07E-05	3.01E-05	3.669385986
BHLHE41	-2.674028943	4.649303343	-13.89683983	2.19E-07	1.63E-06	7.75945943
BHMT	-2.601724117	4.910833394	-12.11966818	7.09E-07	3.60E-06	6.539862885
BHMT2	-2.693738172	4.253962788	-11.76387557	9.14E-07	4.32E-06	6.27428332
BIK	-4.360091277	5.893428264	-10.67398278	2.08E-06	7.97E-06	5.409679365
BIN3	-2.193804846	7.213633086	-13.01515089	3.85E-07	2.34E-06	7.175519462
BIN3-IT1	-2.326435653	5.637428355	-13.53291037	2.76E-07	1.88E-06	7.523184198
BIRC3	-2.769717354	4.830382722	-7.642742313	3.19E-05	7.55E-05	2.503619766
BLACAT1	-2.220345957	4.274817451	-7.177926908	5.21E-05	0.000114452	1.976962242
BLNK	-2.942742994	4.069014014	-6.303330674	0.000140589	0.000272223	0.914757883
BLVRB	-3.194830957	7.839843214	-5.061201769	0.000680488	0.00110942	-0.769812881
BMP1	-2.25844589	6.14942868	-8.724648536	1.10E-05	3.09E-05	3.638289774
BMP10	-2.751334072	4.845563428	-11.83465252	8.69E-07	4.17E-06	6.327734852
BMP15	-2.762365389	4.614968992	-19.23682633	1.28E-08	4.28E-07	10.61208824
BMP2	-2.501710257	5.360158746	-5.657443879	0.000310948	0.000547902	0.065718229
BMP3	-2.15610941	5.082908882	-9.436324656	5.80E-06	1.82E-05	4.322237588
BMP4	-3.795832574	6.80615992	-7.390541977	4.15E-05	9.43E-05	2.220972477
BMP6	-2.580173806	5.101226014	-18.75834726	1.60E-08	4.53E-07	10.39550072
BMP7	-2.391693795	6.069459701	-9.214897989	7.05E-06	2.13E-05	4.114353067
BMX	-2.643247379	4.503223482	-6.975908586	6.50E-05	0.000138566	1.74011106
BNC1	-2.978101398	4.025882636	-6.690127594	8.97E-05	0.000182903	1.396471096
BOK	-3.605530581	6.438291023	-5.815487444	0.000254752	0.00045876	0.278775784
BOLL	-2.484560833	4.960049956	-14.39308776	1.62E-07	1.36E-06	8.071445448
BPIFA1	-5.006018424	6.477003776	-3.458913316	0.007175964	0.009541989	-3.252388493
BPIFA2	-3.261582811	5.060033159	-7.508250181	3.67E-05	8.49E-05	2.353794611
BPIFA3	-2.514055708	6.176327924	-11.53403339	1.08E-06	4.89E-06	6.098523619
BPIFA4P	-2.98934005	5.454543858	-20.94369882	6.07E-09	3.69E-07	11.33512577
BPIFB1	-5.402595617	6.234445926	-3.885288083	0.003703316	0.005180237	-2.562055899
BPIFB2	-2.125645995	5.362852443	-8.535578861	1.32E-05	3.59E-05	3.448616751
BPIFB6	-2.331056691	4.459068492	-10.29920358	2.80E-06	1.01E-05	5.093058859
BPIFC	-2.885740964	4.856122464	-22.0061515	3.92E-09	3.61E-07	11.74960214
BPY2	-2.364551625	4.198255617	-14.6639455	1.38E-07	1.22E-06	8.236982806
BRAT1	-2.719694016	7.528465666	-11.32203516	1.26E-06	5.47E-06	5.933385357
BRD2	-2.246136875	9.08208099	-13.58571703	2.66E-07	1.84E-06	7.55787309
BRD7P3	-2.164512453	4.470742388	-18.9714872	1.45E-08	4.42E-07	10.49277766
BRE-AS1	-3.29307917	5.183647484	-24.07634108	1.77E-09	3.61E-07	12.48864034
BRINP2	-2.692933281	4.984660919	-10.40866433	2.57E-06	9.39E-06	5.186619771
BRPF3	-2.39550552	5.957946548	-18.96388761	1.46E-08	4.42E-07	10.48933142
BRS3	-2.601418316	4.647597249	-14.43237822	1.58E-07	1.34E-06	8.095661837
BRWD1-IT2	-2.151369654	5.14002398	-12.34303544	6.07E-07	3.23E-06	6.702701972
BSPRY	-3.465487773	5.153909817	-8.882034845	9.53E-06	2.73E-05	3.793557979
BST2	-3.247690341	5.906677262	-6.623822888	9.67E-05	0.000195384	1.31527123
BTBD11	-3.559152929	4.874524653	-7.470806452	3.81E-05	8.77E-05	2.311715948
BTBD16	-2.348475652	4.257100877	-12.36047628	6.00E-07	3.21E-06	6.715293538
BTBD19	-2.489521619	5.794279985	-14.47730263	1.54E-07	1.31E-06	8.123265393
BTBD2	-2.945724418	7.592588571	-8.282217776	1.68E-05	4.40E-05	3.188901316
BTBD9	-2.232159241	5.633440022	-13.08477119	3.68E-07	2.27E-06	7.22308144
BTC	-2.76690633	3.619765719	-4.599106966	0.001293063	0.001984605	-1.45201217
BTD	-2.738177979	5.927537319	-13.46047073	2.89E-07	1.93E-06	7.475370716
BTG4	-2.11155	4.056712388	-10.63842456	2.14E-06	8.14E-06	5.380085542
BTN2A2	-2.394904476	5.730543505	-9.195844767	7.17E-06	2.16E-05	4.096262375
BTN2A3P	-2.529817167	5.372355608	-15.05250252	1.10E-07	1.09E-06	8.468851327
BTN3A1	-2.146442268	6.335974471	-6.772278684	8.17E-05	0.000168896	1.496302212
BTN3A2	-2.111045401	6.776005557	-4.245605722	0.002157688	0.003158793	-1.993685525
BTN3A3	-2.345941836	4.860169433	-4.885552825	0.000865389	0.00137943	-1.02558791
BTNL2	-2.393011293	4.860788436	-14.06493474	1.98E-07	1.53E-06	7.866428975
BTNL8	-2.9091159	5.29155411	-8.222116373	1.78E-05	4.62E-05	3.126337579
BTNL9	-2.125605747	5.731005419	-13.47322832	2.86E-07	1.92E-06	7.4838105
BZRAP1-AS1	-2.593497662	4.981126462	-10.84737956	1.81E-06	7.19E-06	5.552683885
C10orf10	-2.626806568	5.847179741	-13.74918126	2.40E-07	1.73E-06	7.664376695
C10orf11	-3.248077504	5.711817447	-11.9734439	7.87E-07	3.87E-06	6.431651336
C10orf113	-2.265285781	4.791266298	-21.26003158	5.31E-09	3.69E-07	11.46122261
C10orf54	-3.345124714	5.428825979	-8.529930684	1.32E-05	3.61E-05	3.44289679
C10orf62	-2.40967057	6.15338996	-11.30373318	1.28E-06	5.53E-06	5.918989953
C10orf67	-2.348587477	5.973716682	-15.96878022	6.56E-08	8.21E-07	8.990974142
C10orf71-AS1	-2.604650884	4.662489782	-11.85290091	8.57E-07	4.13E-06	6.341465687
C10orf82	-2.149514338	5.503977239	-16.06141951	6.24E-08	7.99E-07	9.041931091
C10orf85	-2.429114961	5.20538367	-7.656354279	3.14E-05	7.47E-05	2.518669935
C10orf91	-2.214253079	4.742197552	-12.89439227	4.18E-07	2.48E-06	7.092406507
C10orf95	-2.689515143	5.758652269	-7.733709474	2.90E-05	6.98E-05	2.603805721
C10orf99	-2.822553121	4.812788124	-11.24371992	1.34E-06	5.73E-06	5.871629724
C11orf16	-2.987930826	7.494934503	-5.731791543	0.000282996	0.000503681	0.166380277
C11orf21	-2.280088825	5.024982699	-10.41332046	2.56E-06	9.37E-06	5.19057945
C11orf42	-2.608776155	5.190361741	-12.4198864	5.76E-07	3.11E-06	6.758053046
C11orf44	-2.127756065	4.379966606	-10.77214224	1.92E-06	7.53E-06	5.490898679
C11orf63	-3.564966717	4.891022206	-10.38544797	2.62E-06	9.53E-06	5.166851639
C11orf68	-2.502967127	8.276282523	-7.761011678	2.82E-05	6.82E-05	2.633695536
C11orf71	-2.520814193	6.757679238	-6.589426401	0.000100614	0.000202386	1.272925951
C11orf85	-3.005878855	5.316299877	-24.19667817	1.69E-09	3.61E-07	12.52904451
C11orf88	-3.728089735	4.669322981	-4.501812246	0.001486069	0.002249944	-1.599432633
C11orf96	4.44883028	9.166124899	4.970026377	0.000770488	0.001242094	-0.902033966
C12orf42	-2.443369023	4.486807087	-17.51235341	2.93E-08	5.66E-07	9.799761331
C12orf56	-2.216399093	4.11669767	-20.11584845	8.66E-09	3.91E-07	10.99373235
C12orf75	-2.858340183	9.749607775	-4.647717608	0.00120686	0.001862499	-1.378842964
C12orf80	-2.604186567	5.015099052	-12.344275	6.06E-07	3.23E-06	6.703597464
C14orf132	2.226615534	9.194906008	6.286654049	0.000143402	0.000276963	0.893547929
C14orf178	-2.754072706	6.64601024	-13.91834247	2.16E-07	1.62E-06	7.773218022
C14orf182	-2.18138192	4.224606154	-16.20541868	5.77E-08	7.67E-07	9.120498276
C14orf23	-2.179979296	5.326698604	-10.86522082	1.79E-06	7.11E-06	5.567276169
C14orf28	-2.696407389	5.172482596	-11.54470576	1.07E-06	4.86E-06	6.106759515
C14orf37	-2.119506815	4.958983106	-10.27236672	2.87E-06	1.03E-05	5.069980793
C15orf48	-4.556563391	4.841912894	-3.984523657	0.003185655	0.00450666	-2.403998464
C15orf56	-2.58041208	4.546855432	-17.58785873	2.82E-08	5.54E-07	9.837237348
C16orf3	-3.482099051	4.83204802	-29.80653282	2.64E-10	3.61E-07	14.15469322
C16orf46	-2.717642842	5.982834769	-7.322777278	4.46E-05	0.000100339	2.143778671
C16orf54	-2.718381096	3.578644565	-3.694072875	0.00496822	0.006803535	-2.869567082
C16orf58	-2.153725868	6.65778098	-12.52407076	5.36E-07	2.95E-06	6.832548551
C16orf71	-2.597430007	5.962700732	-13.13598834	3.56E-07	2.22E-06	7.257907097
C16orf78	-2.205017003	4.770489103	-10.6703793	2.08E-06	7.99E-06	5.406684501
C16orf82	-2.829602354	5.099228259	-17.94668471	2.36E-08	5.10E-07	10.01284712
C16orf86	-2.28461681	6.68685579	-13.96901326	2.10E-07	1.59E-06	7.805552591
C16orf89	-3.010753935	5.368612496	-12.83278712	4.35E-07	2.55E-06	7.049702544
C16orf93	-3.458928933	6.445428605	-12.02962178	7.56E-07	3.77E-06	6.473377978
C17orf47	-2.644240945	4.978799001	-13.31333429	3.17E-07	2.05E-06	7.377434491
C17orf53	-2.188217694	6.788011343	-4.243133513	0.002165565	0.003169192	-1.997531376
C17orf64	-2.609593267	4.446832323	-17.00062948	3.80E-08	6.26E-07	9.540823942
C17orf67	-2.738403823	6.336804164	-6.667522918	9.20E-05	0.000186955	1.368851381
C17orf82	-2.573471922	7.173620091	-10.40050487	2.58E-06	9.44E-06	5.179676832
C17orf97	-3.001699159	6.987661172	-4.17894153	0.002381212	0.003456838	-2.097660648
C17orf99	-2.232598938	4.031475343	-19.46875336	1.16E-08	4.21E-07	10.71478395
C18orf15	-2.808781216	5.239327177	-16.10696654	6.09E-08	7.87E-07	9.06686584
C18orf61	-2.551552725	5.15923567	-22.88349991	2.77E-09	3.61E-07	12.07330242
C19orf33	-3.896391495	5.158219757	-3.562918439	0.006093974	0.008211593	-3.082511023
C19orf47	-2.190265051	6.120094456	-13.06924159	3.72E-07	2.29E-06	7.212494516
C19orf66	-2.78260641	5.781045675	-8.78388453	1.04E-05	2.95E-05	3.697004611
C19orf73	-2.589278672	6.020778079	-10.18059121	3.09E-06	1.09E-05	4.990640116
C19orf84	-3.083553327	6.805965098	-19.14741873	1.34E-08	4.30E-07	10.57210496
C1GALT1	-2.119046622	6.673723812	-5.687800731	0.000299189	0.000529278	0.106912982
C1orf100	-2.975615763	4.87452354	-16.38133304	5.25E-08	7.34E-07	9.215435817
C1orf110	-4.027595371	4.342776245	-7.549965499	3.51E-05	8.18E-05	2.400485032
C1orf111	-2.661668188	5.188808454	-10.64479529	2.13E-06	8.11E-06	5.385394447
C1orf115	-2.268843054	5.601438935	-4.931259492	0.00081257	0.001303463	-0.958610391
C1orf116	-3.62381464	5.168534072	-5.491784041	0.00038461	0.00066291	-0.161368664
C1orf127	-2.186736922	6.650272661	-9.76412479	4.37E-06	1.44E-05	4.622237946
C1orf158	-2.988854314	5.265084506	-5.977757123	0.000208327	0.000383668	0.493922961
C1orf162	-2.35204961	5.193397101	-12.11649522	7.11E-07	3.61E-06	6.537528436
C1orf168	-2.500780231	4.635591275	-5.155160427	0.000599476	0.000989406	-0.634792132
C1orf180	-2.559593588	4.595351206	-17.93148515	2.38E-08	5.11E-07	10.0054907
C1orf192	-4.506661877	5.041935246	-4.073354485	0.002787154	0.003990648	-2.263469186
C1orf200	-2.745249279	7.317705955	-8.975025392	8.75E-06	2.55E-05	3.884201813
C1orf210	-2.37578049	4.050705496	-6.029501235	0.000195525	0.000362703	0.561767239
C1orf233	-2.131375157	7.1818386	-8.951510823	8.94E-06	2.59E-05	3.861356667
C1orf68	-2.901293763	5.409118508	-18.42464994	1.88E-08	4.74E-07	10.24056299
C1orf87	-3.62880039	4.56338927	-4.904379026	0.000843199	0.001347103	-0.997964656
C1orf95	-2.323598984	5.652923129	-11.18615972	1.40E-06	5.92E-06	5.825978076
C1QA	-2.318368568	5.583576554	-21.92882286	4.04E-09	3.61E-07	11.72028795
C1QB	-2.354534156	4.228781212	-14.92474868	1.18E-07	1.13E-06	8.393329118
C1QC	-2.349605916	4.704409988	-14.11299519	1.92E-07	1.51E-06	7.896767315
C1QTNF1	-2.237278496	5.714239599	-14.80989179	1.26E-07	1.17E-06	8.324837173
C1QTNF6	-2.166640235	5.539280469	-11.6459766	9.96E-07	4.59E-06	6.184546247
C1QTNF9B-AS1	-3.29189743	5.529925692	-10.81124435	1.87E-06	7.35E-06	5.523059849
C1R	-2.825121058	6.091834346	-10.08695116	3.34E-06	1.16E-05	4.909011942
C1RL	-2.143878269	5.369213977	-4.288350168	0.00202621	0.002984466	-1.927314213
C1RL-AS1	-2.694805819	5.930679541	-13.44718032	2.91E-07	1.94E-06	7.466569697
C1S	-2.786995163	4.732262021	-16.05098335	6.28E-08	8.02E-07	9.036206821
C20orf141	-3.056384656	5.920303315	-11.29419428	1.29E-06	5.56E-06	5.9114783
C20orf166-AS1	-2.930469226	6.092382285	-21.16966847	5.52E-09	3.69E-07	11.42544031
C20orf173	-2.618404513	5.382804327	-11.86594671	8.49E-07	4.10E-06	6.35126923
C20orf181	-2.194461927	5.30754216	-12.71671446	4.70E-07	2.69E-06	6.968677717
C20orf195	-2.736329448	6.033522626	-13.6456771	2.57E-07	1.79E-06	7.597092729
C20orf202	-2.281899679	5.048994053	-14.51445715	1.50E-07	1.30E-06	8.146026353
C20orf203	-2.603848476	6.190328461	-10.7977714	1.89E-06	7.41E-06	5.511990787
C20orf26	-2.159106547	4.557263981	-10.20059999	3.04E-06	1.08E-05	5.007993446
C20orf78	-2.7994004	5.126324761	-15.29705026	9.54E-08	1.01E-06	8.611511334
C21orf128	-2.40489433	4.838342701	-13.49861767	2.82E-07	1.90E-06	7.500582378
C21orf15	-2.221152421	6.067933385	-8.898734068	9.38E-06	2.70E-05	3.809895206
C21orf49	-2.449016374	5.271880434	-17.53768122	2.89E-08	5.62E-07	9.812353002
C21orf67	-2.195804137	6.050154283	-14.58763584	1.44E-07	1.26E-06	8.190675731
C21orf90	-2.550627229	5.672318023	-15.77099945	7.32E-08	8.71E-07	8.88108663
C22orf15	-2.786225249	5.777879062	-11.41063718	1.18E-06	5.20E-06	6.002761343
C22orf23	-4.47046424	5.372483392	-11.60618513	1.02E-06	4.70E-06	6.15406053
C22orf24	-3.162068269	4.871909565	-19.96471177	9.25E-09	3.96E-07	10.92955809
C22orf42	-2.932569339	4.30463281	-22.18395643	3.65E-09	3.61E-07	11.81651485
C2CD4A	-2.715301348	4.031879111	-8.344006289	1.58E-05	4.18E-05	3.252835984
C2orf16	-2.520523533	6.44720126	-11.06071674	1.54E-06	6.35E-06	5.72570834
C2orf40	-3.642647592	4.812264043	-5.02293443	0.000716801	0.0011626	-0.82516379
C2orf54	-2.466345274	5.44183737	-12.56485343	5.21E-07	2.90E-06	6.861541258
C2orf61	-2.128605039	4.746105064	-9.19837912	7.15E-06	2.15E-05	4.098670572
C2orf71	-2.246222755	5.315992171	-13.77162227	2.37E-07	1.71E-06	7.678895452
C2orf73	-2.949907129	4.542901441	-4.952501119	0.000789214	0.00126948	-0.927583977
C2orf80	-2.184492188	3.679908361	-18.56405575	1.76E-08	4.64E-07	10.30568661
C2orf82	-2.217497785	5.621450095	-9.995779441	3.60E-06	1.23E-05	4.828871233
C2orf83	-2.62413864	4.404923996	-15.8551489	6.98E-08	8.51E-07	8.928024196
C3	-3.560273357	6.888955102	-3.684055505	0.005045947	0.006899815	-2.885776774
C3orf20	-2.363271952	5.401031834	-8.303531689	1.64E-05	4.33E-05	3.210999504
C3orf49	-2.234030867	4.718887493	-15.13206155	1.05E-07	1.06E-06	8.51553569
C3orf52	-2.8847789	5.538290326	-9.42969026	5.83E-06	1.83E-05	4.316071288
C3orf55	-2.506908433	4.084118043	-21.00408155	5.91E-09	3.69E-07	11.35937681
C3orf67	-2.541052382	4.511548253	-3.700105385	0.004922021	0.006744784	-2.859810078
C4orf17	-2.638304634	5.394427904	-12.43657515	5.69E-07	3.09E-06	6.770027902
C4orf22	-3.213558638	3.992584355	-3.73281132	0.004679303	0.006435458	-2.806971859
C4orf32	-2.418770484	5.430555254	-4.517833568	0.001452275	0.002204979	-1.57506869
C4orf45	-2.708697601	4.419165663	-19.25740904	1.27E-08	4.28E-07	10.62126161
C4orf47	-3.218603006	4.75770017	-5.247866633	0.000529656	0.000884951	-0.502803064
C4orf6	-2.436267572	4.363063812	-10.82586848	1.85E-06	7.28E-06	5.535060048
C5orf46	-2.937018862	5.776234458	-4.31778499	0.001940655	0.002868776	-1.881745958
C5orf64	-2.898703625	4.077029649	-20.42577038	7.57E-09	3.79E-07	11.12351729
C6	-2.393642082	5.560676046	-5.043398324	0.000697129	0.001134471	-0.795538372
C6orf1	-2.451026075	6.788562739	-10.03893272	3.47E-06	1.20E-05	4.866885561
C6orf106	-2.34973565	7.188110931	-13.74584201	2.41E-07	1.73E-06	7.662214183
C6orf132	-3.123372842	4.764032993	-6.643347811	9.46E-05	0.00019155	1.339240711
C6orf141	-2.11001567	3.983825306	-15.56693683	8.19E-08	9.28E-07	8.766115355
C6orf165	-3.602113266	6.475786583	-5.291086709	0.000500154	0.000841639	-0.441687361
C6orf201	-2.642012556	4.00193271	-13.51617531	2.79E-07	1.89E-06	7.512161739
C6orf223	-2.286237501	6.037574658	-10.39624815	2.59E-06	9.46E-06	5.176052771
C6orf52	-2.624020433	6.266141634	-6.259178548	0.000148172	0.000284911	0.8585228
C6orf58	-2.904662667	4.320106021	-16.97510843	3.85E-08	6.29E-07	9.52767951
C6orf99	-2.177539613	5.123759203	-12.54426245	5.29E-07	2.93E-06	6.846914753
C7orf50	-2.163934406	6.729667778	-8.950409321	8.95E-06	2.60E-05	3.860285266
C7orf63	-3.697893144	5.857164618	-7.53382658	3.57E-05	8.30E-05	2.382444838
C7orf69	-2.165701582	4.330418159	-15.39802538	9.01E-08	9.78E-07	8.669698944
C8A	-2.818374186	4.514089586	-20.27642029	8.07E-09	3.85E-07	11.06127568
C8B	-3.716052585	4.853454863	-21.62157559	4.58E-09	3.67E-07	11.60251708
C8orf22	-2.409477288	4.069912104	-13.45183645	2.90E-07	1.94E-06	7.469654038
C8orf34	-2.393630311	3.675772896	-10.44438185	2.49E-06	9.18E-06	5.216953052
C9orf117	-2.965942461	6.04151916	-12.38293948	5.90E-07	3.17E-06	6.731485063
C9orf131	-2.272691143	6.246877481	-6.855069352	7.44E-05	0.000155779	1.596050934
C9orf135-AS1	-2.378870459	4.769334561	-13.59797911	2.64E-07	1.83E-06	7.565908196
C9orf152	-3.350388557	3.997000318	-4.980841783	0.000759171	0.001225201	-0.886287951
C9orf163	-2.325561559	6.805394453	-15.78644713	7.25E-08	8.69E-07	8.88972371
C9orf172	-2.333459443	6.087259309	-4.410167245	0.001696273	0.002533697	-1.739462361
C9orf173	-2.434118271	5.814133483	-9.73358362	4.49E-06	1.47E-05	4.59466815
C9orf41	-2.26323789	5.655427933	-4.523301349	0.001440931	0.002190031	-1.56676168
C9orf43	-2.103235788	4.615733302	-16.49711014	4.94E-08	7.08E-07	9.277302111
C9orf66	-2.513240068	4.263023913	-11.94019446	8.05E-07	3.94E-06	6.406864454
C9orf9	-3.04890571	5.748907433	-5.353832211	0.00046044	0.000780783	-0.353434581
CA1	-2.465097742	5.273715881	-20.02014292	9.03E-09	3.94E-07	10.9531628
CA12	-2.917521136	6.131279597	-6.347214855	0.000133468	0.000260084	0.970395032
CA2	-6.197262685	5.102151373	-4.853948606	0.000904066	0.001435489	-1.07207252
CA4	-2.132758558	5.014727053	-13.46719673	2.87E-07	1.92E-06	7.479821324
CA5B	-2.602086665	5.688138533	-10.54536479	2.30E-06	8.63E-06	5.302197337
CA8	-2.357539936	4.115795712	-10.76656485	1.93E-06	7.55E-06	5.486302414
CABP4	-2.322741784	6.332419284	-12.45732331	5.61E-07	3.06E-06	6.784893247
CABYR	-2.552458939	6.17043352	-6.688855121	8.98E-05	0.000183132	1.394918042
CACNA1D	-2.127979625	4.820260045	-19.27444648	1.26E-08	4.27E-07	10.62884609
CACNA1F	-2.296567193	5.76803054	-10.36008009	2.67E-06	9.69E-06	5.145204952
CACNA2D4	-2.696601641	4.474527755	-20.74033293	6.61E-09	3.75E-07	11.25281119
CACNB1	-2.389525421	5.663803758	-11.95331957	7.98E-07	3.91E-06	6.416657069
CACNG2	-2.608669057	5.246415436	-18.82349255	1.55E-08	4.47E-07	10.42537067
CACNG3	-2.306282131	5.494381192	-7.660758887	3.13E-05	7.44E-05	2.52353548
CACNG5	-2.332036842	5.236427096	-15.05136755	1.10E-07	1.09E-06	8.468183417
CACNG6	-2.749440417	6.66848676	-11.67918416	9.72E-07	4.51E-06	6.209910606
CACNG7	-2.874937592	4.216156899	-21.95054381	4.00E-09	3.61E-07	11.7285352
CADM3	-2.638468269	5.417798054	-15.46771042	8.66E-08	9.53E-07	8.709614565
CADM3-AS1	-2.469660267	5.420553672	-15.27773775	9.65E-08	1.02E-06	8.600334991
CADPS2	-4.741876071	5.001918281	-11.8906392	8.34E-07	4.05E-06	6.369796144
CALCOCO1	-3.076545047	7.462248459	-10.49037382	2.40E-06	8.94E-06	5.255871131
CALCOCO2	-2.526826041	6.498598893	-16.14494248	5.96E-08	7.80E-07	9.087596321
CALCR	-2.115362964	4.317943151	-15.00634833	1.13E-07	1.10E-06	8.441646755
CALCRL	-2.113125875	4.390062218	-17.41747197	3.07E-08	5.75E-07	9.752405605
CALHM3	-2.49127643	5.024380196	-23.58356019	2.12E-09	3.61E-07	12.32037602
CALML3	-2.480092991	5.400709377	-11.22264452	1.36E-06	5.80E-06	5.854940505
CALR	-2.597912584	9.27663197	-5.931584152	0.000220522	0.000402827	0.433073478
CAMK1D	-2.275378292	6.719484806	-3.862771617	0.003832734	0.005348469	-2.598070068
CAMK1G	-3.021327362	5.114170263	-13.03178383	3.81E-07	2.32E-06	7.186905917
CAMK2A	-2.283020719	5.793320872	-14.62141032	1.41E-07	1.24E-06	8.211202823
CAMK2N1	-2.708244258	6.399498213	-4.002005012	0.0031027	0.004399039	-2.376270406
CAMSAP3	-2.154363085	5.663289888	-9.667801541	4.75E-06	1.54E-05	4.535022905
CAND1.11	-2.541248764	5.085783931	-17.69499783	2.67E-08	5.48E-07	9.890099321
CAPG	-3.205087878	6.232986889	-5.01193234	0.000727624	0.001178752	-0.841116018
CAPN12	-2.252224529	5.840098607	-15.60093491	8.04E-08	9.20E-07	8.785384122
CAPN13	-2.781135382	5.025036144	-9.196849504	7.16E-06	2.16E-05	4.097217166
CAPN5	-2.516154872	6.569857012	-7.483620137	3.76E-05	8.68E-05	2.326133842
CAPN8	-2.462543948	4.811380092	-10.41512342	2.55E-06	9.37E-06	5.192112292
CAPN9	-2.546635226	4.830349281	-13.59802665	2.64E-07	1.83E-06	7.565939329
CAPNS1	-2.889932251	10.92783156	-6.629745301	9.61E-05	0.000194175	1.32254695
CAPNS2	-2.242801304	5.603362768	-9.215662857	7.04E-06	2.12E-05	4.115078617
CAPSL	-4.586524214	5.010365441	-3.895508308	0.003646106	0.005106495	-2.545727187
CAPZB	-2.488682074	8.437918614	-15.39425212	9.03E-08	9.79E-07	8.667532024
CARD10	-2.786645055	5.801117091	-10.50705353	2.37E-06	8.84E-06	5.269946397
CARD14	-2.18509826	5.306852618	-14.50031336	1.52E-07	1.30E-06	8.13736911
CARD16	-2.239653883	3.872392465	-4.960073668	0.000781063	0.001257952	-0.916538644
CARD6	-4.798263294	5.243559955	-11.03116645	1.58E-06	6.45E-06	5.70193103
CARNS1	-2.385990842	5.115420348	-12.90150905	4.16E-07	2.47E-06	7.097326483
CARS	-2.537161401	7.785366572	-11.18266328	1.40E-06	5.93E-06	5.823197801
CASC11	-2.23275444	4.397321874	-18.49590332	1.81E-08	4.65E-07	10.27392081
CASC16	-2.7781589	4.790074444	-13.26700981	3.27E-07	2.09E-06	7.346370454
CASC17	-2.314303597	5.215806604	-20.54651057	7.18E-09	3.75E-07	11.17343124
CASC2	-2.639051848	4.294470618	-8.033379143	2.14E-05	5.40E-05	2.927428886
CASC6	-2.889320229	4.020713139	-24.6414673	1.44E-09	3.61E-07	12.67611099
CASP1	-3.844061842	4.775585911	-9.139821765	7.54E-06	2.25E-05	4.042880761
CASP14	-2.632127511	4.567416939	-17.11337617	3.58E-08	6.10E-07	9.598627704
CASP2	-2.309328927	6.549197722	-6.740028433	8.47E-05	0.000174206	1.457213054
CASP4	-2.105298482	4.912267612	-6.602891456	9.91E-05	0.000199686	1.289520791
CASP5	-3.352147272	4.469294125	-24.28579617	1.63E-09	3.61E-07	12.55879614
CASP8	-3.526840072	4.965836955	-20.66219353	6.84E-09	3.75E-07	11.22091907
CASQ2	-2.344550558	5.170182111	-10.87909857	1.77E-06	7.06E-06	5.578611152
CAST	-2.533762096	7.308978803	-7.240527561	4.87E-05	0.000108234	2.049360872
CATIP-AS1	-2.16348532	5.553413506	-12.96303641	3.99E-07	2.40E-06	7.13974752
CATSPER1	-2.694840854	6.375603166	-9.618264431	4.95E-06	1.59E-05	4.489868219
CATSPER3	-2.985205748	4.652854129	-15.7745667	7.30E-08	8.71E-07	8.883081971
CATX-1	-2.34347722	4.324468507	-16.05857422	6.25E-08	7.99E-07	9.040370848
CAV1	-7.460078837	6.146055538	-8.957292625	8.89E-06	2.58E-05	3.866978623
CAV2	-5.93935591	5.362595376	-18.18931233	2.10E-08	4.81E-07	10.12930984
CAV3	-2.304348757	6.422448246	-15.08965234	1.07E-07	1.08E-06	8.490683401
CBLN3	-3.134519641	5.247202198	-14.13765876	1.89E-07	1.49E-06	7.912294279
CBR3	-3.326815571	7.219121613	-7.407180647	4.08E-05	9.28E-05	2.239844612
CBX6	-2.270282973	8.967934745	-4.492595635	0.001505891	0.002277289	-1.613464235
CBX7	-3.237634284	6.024373335	-14.52455835	1.50E-07	1.29E-06	8.152203702
CBY1	-2.72899102	6.76969835	-16.24107914	5.66E-08	7.60E-07	9.139835625
CC2D2A	-2.80775916	5.672876814	-5.829006622	0.000250484	0.00045187	0.296839336
CC2D2B	-2.100658259	5.761763013	-7.774421072	2.78E-05	6.74E-05	2.64834571
CCBE1	-2.963274082	5.601526582	-3.585648894	0.005881149	0.007941026	-3.045498333
CCDC109B	-3.949782356	7.267190515	-3.464428373	0.007113817	0.009465504	-3.24336005
CCDC11	-3.173927474	4.592928194	-4.583044739	0.001322979	0.002026719	-1.476260566
CCDC110	-2.158415503	3.761198349	-10.01328837	3.55E-06	1.22E-05	4.844312972
CCDC114	-2.519736293	4.799918933	-6.395319158	0.000126112	0.000247422	1.031089964
CCDC116	-2.818528906	5.099030264	-12.17357496	6.83E-07	3.51E-06	6.579431978
CCDC120	-2.257524488	5.112557228	-17.34160859	3.19E-08	5.85E-07	9.714329706
CCDC121	-2.496986382	5.278564081	-4.003161076	0.003097295	0.004391985	-2.374437959
CCDC125	-2.147350032	5.799245449	-3.635412423	0.005442	0.007388538	-2.96462057
CCDC134	-2.185401888	6.78923864	-7.54641295	3.52E-05	8.20E-05	2.39651651
CCDC135	-3.637015417	5.87466252	-6.61706724	9.75E-05	0.000196788	1.306966385
CCDC13-AS1	-2.279865703	4.643313585	-14.88708014	1.21E-07	1.14E-06	8.370928801
CCDC146	-3.567330518	5.58632171	-3.939274073	0.00341149	0.004801904	-2.475933142
CCDC147	-2.861778477	4.724539892	-7.917237932	2.41E-05	5.95E-05	2.803157222
CCDC148	-2.629941691	4.225776435	-6.51535409	0.000109612	0.00021838	1.181218203
CCDC149	-2.485603567	5.603604246	-12.73430588	4.65E-07	2.67E-06	6.981005197
CCDC151	-3.081141531	6.491384859	-6.120902976	0.000174953	0.000329288	0.680717013
CCDC155	-2.290977513	4.548780861	-13.0686083	3.72E-07	2.29E-06	7.212062513
CCDC157	-2.402185488	5.781478369	-14.53423614	1.49E-07	1.29E-06	8.158117847
CCDC159	-2.243632139	6.037202475	-8.383199254	1.52E-05	4.05E-05	3.293189364
CCDC160	-3.591002687	3.790020234	-6.491687744	0.000112669	0.000223708	1.151767432
CCDC163P	-2.20291923	6.547818637	-10.13909491	3.20E-06	1.12E-05	4.954551561
CCDC17	-4.582021948	5.165720392	-5.676581996	0.000303477	0.000536123	0.091704019
CCDC170	-4.226959338	5.095113535	-4.671069141	0.00116766	0.001808552	-1.343809929
CCDC173	-3.175520466	4.990232974	-6.452001638	0.000118005	0.000233083	1.102217693
CCDC176	-2.971876867	6.013308588	-7.125784904	5.52E-05	0.000120447	1.916301893
CCDC178	-3.372482711	5.309617303	-24.70875587	1.40E-09	3.61E-07	12.69805253
CCDC184	-2.182763787	5.856765133	-4.954621537	0.000786922	0.001266491	-0.924490312
CCDC186	-2.634080577	5.681095846	-7.215438805	5.01E-05	0.000110636	2.020401317
CCDC19	-2.99290493	6.452070623	-4.338575469	0.001882552	0.002788729	-1.849627769
CCDC24	-2.261287961	6.743506266	-9.331089158	6.36E-06	1.96E-05	4.223975654
CCDC28A	-2.590071628	8.240763816	-4.188073762	0.002349186	0.003413736	-2.083384279
CCDC30	-2.241137927	4.437837752	-9.247410059	6.85E-06	2.08E-05	4.145147834
CCDC33	-2.60041221	6.001093965	-13.01841288	3.85E-07	2.34E-06	7.177753695
CCDC36	-2.118363277	5.126990773	-17.16537301	3.49E-08	6.04E-07	9.625140785
CCDC37-AS1	-2.625849155	5.038008448	-18.42103589	1.88E-08	4.74E-07	10.23886703
CCDC38	-2.134703282	4.709646439	-14.10645334	1.93E-07	1.51E-06	7.892644117
CCDC42B	-2.229945218	6.495123396	-10.0714655	3.38E-06	1.17E-05	4.895446357
CCDC53	-2.281157731	8.806186429	-17.24241373	3.36E-08	5.97E-07	9.664256746
CCDC54	-2.518871423	4.342232874	-17.58978035	2.82E-08	5.54E-07	9.838188714
CCDC6	-2.269650441	8.502622321	-5.775486413	0.000267849	0.000480021	0.225179966
CCDC60	-3.317165338	6.531513781	-6.708214467	8.78E-05	0.000179587	1.418523889
CCDC62	-3.13895416	5.405409019	-30.39824359	2.22E-10	3.61E-07	14.30073741
CCDC63	-2.248334748	5.465841443	-10.99932109	1.61E-06	6.57E-06	5.676239416
CCDC64B	-2.671632575	6.000342142	-7.941678295	2.35E-05	5.83E-05	2.829428571
CCDC65	-2.470075694	4.185269993	-4.005871438	0.003084664	0.004375704	-2.370142438
CCDC69	-3.725186253	4.891383929	-6.004737686	0.000201542	0.000372614	0.529344205
CCDC71	-2.174530505	6.579471933	-7.44961761	3.90E-05	8.93E-05	2.287832988
CCDC79	-2.333400927	4.442270983	-11.1845927	1.40E-06	5.92E-06	5.824732125
CCDC8	-2.974579005	5.63754082	-6.931879142	6.83E-05	0.000144566	1.687829725
CCDC80	-3.982264259	5.833207363	-5.660456204	0.000309759	0.000545948	0.069811779
CCDC81	-4.058354511	4.87255635	-21.26859646	5.29E-09	3.69E-07	11.46460436
CCDC85A	-2.627099515	4.748974479	-5.696814482	0.000295791	0.000523901	0.11911993
CCDC87	-2.653921358	5.89173233	-17.84524552	2.48E-08	5.23E-07	9.963615068
CCDC96	-3.702003484	6.012049833	-4.68986851	0.001137095	0.001765889	-1.315661129
CCKAR	-2.322897889	5.875445868	-11.2247347	1.36E-06	5.80E-06	5.856597013
CCKBR	-2.554673217	4.739268726	-17.29677553	3.27E-08	5.93E-07	9.691738694
CCL11	-2.670259758	4.272017298	-19.10490653	1.36E-08	4.33E-07	10.5530156
CCL16	-3.110263865	4.731750078	-25.33047059	1.12E-09	3.61E-07	12.89707209
CCL20	-3.725870371	4.672334197	-4.11258046	0.002628357	0.003785804	-2.201712126
CCL22	-2.926771636	6.192718708	-13.958411	2.11E-07	1.59E-06	7.798797106
CCL24	-2.304021331	5.280389463	-12.36951268	5.96E-07	3.20E-06	6.721810505
CCL25	-2.91581105	4.866961539	-20.35398743	7.81E-09	3.83E-07	11.09367121
CCL26	-2.515815564	4.666288566	-17.21130863	3.41E-08	6.00E-07	9.648487637
CCL27	-2.244888772	4.785562325	-10.18550196	3.08E-06	1.09E-05	4.994902021
CCL28	-2.677707464	4.571813064	-11.02312231	1.59E-06	6.48E-06	5.69544796
CCL4	-2.522645664	5.279633784	-13.64794935	2.56E-07	1.79E-06	7.598575492
CCL5	-2.230322747	4.893467557	-18.63576758	1.70E-08	4.61E-07	10.33896433
CCL7	-2.730848071	4.312216581	-13.32956557	3.14E-07	2.04E-06	7.388292609
CCNB3	-2.743306412	5.797689208	-10.41266358	2.56E-06	9.37E-06	5.190020925
CCND2	-3.651238307	5.023448645	-9.262524268	6.76E-06	2.06E-05	4.159431666
CCND3	-2.129820937	7.372733514	-13.02171353	3.84E-07	2.34E-06	7.180013828
CCNH	-2.139343491	9.540962223	-5.819752636	0.000253397	0.000456641	0.284477428
CCNO	-4.827409231	5.653425062	-8.954253692	8.92E-06	2.59E-05	3.864024093
CCPG1	-4.245815992	5.605472324	-6.753260687	8.34E-05	0.000172048	1.473267182
CCR1	-2.502822373	4.446282061	-20.45019453	7.49E-09	3.79E-07	11.13364326
CCR2	-2.166259801	4.417212473	-17.4826717	2.97E-08	5.68E-07	9.784978613
CCR4	-3.046182193	5.065893768	-14.76032198	1.30E-07	1.19E-06	8.295101889
CCR5	-3.788556655	6.221916311	-20.02773258	9.00E-09	3.94E-07	10.95638862
CCR6	-2.405807391	3.712499172	-17.92010578	2.39E-08	5.12E-07	9.999978506
CCR7	-3.015568686	4.051412071	-16.5165681	4.89E-08	7.06E-07	9.2876521
CCR8	-3.033204319	5.176294161	-15.17701424	1.02E-07	1.05E-06	8.541796681
CCR9	-2.162169293	4.590208481	-18.8468936	1.54E-08	4.45E-07	10.43607064
CCT6B	-3.815092833	5.461481767	-12.26693349	6.40E-07	3.35E-06	6.647552079
CCZ1	-2.271936889	5.849922962	-15.02051315	1.12E-07	1.09E-06	8.450005448
CD101	-2.289822436	5.094515826	-10.03678644	3.48E-06	1.20E-05	4.864998377
CD109	-4.137393935	5.341308039	-13.7707184	2.37E-07	1.71E-06	7.678311143
CD14	-2.174387784	5.361765966	-7.612085414	3.29E-05	7.75E-05	2.469647602
CD151	-3.579231547	8.573467542	-6.172545474	0.00016438	0.000311595	0.747423904
CD160	-2.294963138	4.07324247	-9.855729372	4.05E-06	1.36E-05	4.704469697
CD163	-2.367991831	4.465461243	-20.69946226	6.73E-09	3.75E-07	11.23614851
CD177	-2.241541162	5.870155287	-5.019939461	0.00071973	0.001167072	-0.829504574
CD19	-3.103705546	4.950337085	-25.16555954	1.19E-09	3.61E-07	12.8449258
CD1A	-2.512547895	5.876306338	-11.36235629	1.23E-06	5.34E-06	5.965021402
CD1B	-3.196504544	4.796543091	-16.69035499	4.46E-08	6.77E-07	9.37949215
CD2	-3.279015196	5.194407693	-17.3485785	3.18E-08	5.83E-07	9.71783582
CD200R1	-2.522921493	4.404190527	-22.34842993	3.42E-09	3.61E-07	11.87780864
CD207	-2.314104951	4.91332206	-13.09467628	3.66E-07	2.26E-06	7.229827317
CD209	-2.104081424	5.59844981	-12.06253389	7.38E-07	3.70E-06	6.497734925
CD244	-2.113099485	4.679281562	-14.49500784	1.52E-07	1.31E-06	8.134119362
CD27	-2.498480875	5.469731135	-6.815422503	7.78E-05	0.000161858	1.548390321
CD274	-2.764564689	5.636075276	-6.081413942	0.000183537	0.000342952	0.629465438
CD300LF	-2.255147036	4.68312981	-14.36743337	1.64E-07	1.37E-06	8.055595832
CD300LG	-2.521282893	5.08947432	-19.31498224	1.24E-08	4.27E-07	10.6468592
CD33	-2.234884776	5.167480788	-10.46822067	2.45E-06	9.05E-06	5.237145027
CD34	-2.182123785	6.364710273	-12.97897183	3.95E-07	2.39E-06	7.15070122
CD38	-2.880011175	5.934555361	-11.47253311	1.13E-06	5.03E-06	6.050919996
CD3D	-2.228922721	5.628144511	-12.06526033	7.37E-07	3.70E-06	6.499749727
CD3E	-3.318996793	5.540657063	-24.53668006	1.49E-09	3.61E-07	12.64178256
CD40	-2.752872453	5.815921879	-18.55422276	1.76E-08	4.64E-07	10.30111189
CD40LG	-2.632204861	5.807797345	-19.99848902	9.12E-09	3.94E-07	10.94395116
CD44	-3.950213152	4.903865673	-6.742254796	8.45E-05	0.000173802	1.459915753
CD48	-2.193312805	5.390175323	-14.36943632	1.64E-07	1.37E-06	8.056834359
CD5	-2.755679891	6.035304767	-17.50709316	2.94E-08	5.66E-07	9.797143597
CD53	-2.749180228	4.976769572	-21.41275521	4.99E-09	3.68E-07	11.52127103
CD55	-5.676213196	6.216792497	-7.217791318	4.99E-05	0.000110429	2.023119961
CD59	-3.730584186	8.375815562	-5.641300861	0.000317405	0.000557933	0.043759238
CD5L	-2.204700766	4.632005026	-15.79175117	7.23E-08	8.69E-07	8.892687158
CD6	-2.293421216	5.330924157	-14.39391104	1.62E-07	1.36E-06	8.071953587
CD74	-2.795484246	5.714377619	-4.059704246	0.002844778	0.004064621	-2.285003292
CD80	-2.248668427	4.530690171	-20.2684064	8.10E-09	3.85E-07	11.05792012
CD81	-2.405838576	10.94818821	-13.38794002	3.02E-07	1.98E-06	7.427231239
CD81-AS1	-2.142780833	5.149942059	-13.84823497	2.26E-07	1.66E-06	7.728277438
CD82	-2.737586777	6.784137766	-7.419750266	4.02E-05	9.17E-05	2.254080222
CD84	-2.274930257	4.730352447	-16.66064959	4.53E-08	6.82E-07	9.363869947
CD86	-2.596407605	4.608804516	-19.00595837	1.43E-08	4.39E-07	10.50838908
CD8A	-2.30406532	6.011657126	-7.449997323	3.90E-05	8.93E-05	2.288261435
CD8B	-2.206119628	4.872819311	-13.71468427	2.46E-07	1.75E-06	7.642010024
CD93	-2.732796518	5.02241818	-18.55366675	1.76E-08	4.64E-07	10.30085312
CD97	-2.641882536	6.576018521	-5.504169784	0.000378495	0.000653471	-0.144256322
CD99L2	-2.444969324	6.266106004	-12.45123439	5.63E-07	3.07E-06	6.780533302
CD99P1	-2.815695761	5.523227613	-10.73354626	1.98E-06	7.71E-06	5.459046384
CDA	-2.756255286	5.32838314	-10.10393939	3.29E-06	1.15E-05	4.923872039
CDC20B	-2.719235843	4.366276726	-5.029213755	0.000710702	0.001154355	-0.816066934
CDC42BPG	-2.274705067	5.3189452	-16.24932913	5.64E-08	7.59E-07	9.14430259
CDC42EP1	-4.658208825	6.796816358	-13.38541033	3.03E-07	1.99E-06	7.425547419
CDC42EP2	-2.268234937	6.802043773	-21.2419256	5.35E-09	3.69E-07	11.45406809
CDCP1	-2.941218139	5.261840118	-8.842897146	9.88E-06	2.82E-05	3.755166096
CDH1	-4.644324603	4.869497326	-4.691235862	0.001134905	0.001763024	-1.313615668
CDH13	-2.784974595	4.367605863	-9.601553857	5.02E-06	1.61E-05	4.474589397
CDH17	-3.344060095	4.580179506	-22.29768133	3.49E-09	3.61E-07	11.85895755
CDH22	-2.239643124	6.378490757	-11.89639843	8.31E-07	4.03E-06	6.374111914
CDH26	-3.042519265	4.563811203	-5.355331317	0.000459534	0.000779311	-0.351332907
CDH3	-4.131765238	6.46232578	-5.040229723	0.000700137	0.001138912	-0.800121638
CDH4	-2.279404519	5.113486027	-9.875601356	3.98E-06	1.34E-05	4.722217845
CDH6	-3.193913203	5.41597798	-6.726847076	8.60E-05	0.000176449	1.441198674
CDHR2	-2.587056495	5.96180329	-15.3116867	9.46E-08	1.01E-06	8.619971428
CDHR3	-3.050674021	4.994728431	-4.473560295	0.00154773	0.002335006	-1.642480363
CDK14	-2.337997138	6.437640292	-4.926879835	0.000817477	0.001309897	-0.965015446
CDK15	-2.41435834	5.338107068	-13.07045812	3.72E-07	2.29E-06	7.213324317
CDK16	-2.375738972	8.571006563	-5.908190435	0.000226995	0.000413581	0.402131951
CDK18	-2.212504395	6.472106028	-4.98802787	0.00075175	0.001214375	-0.875834991
CDK20	-2.582609535	7.40999481	-11.31949138	1.27E-06	5.48E-06	5.931385883
CDKL1	-2.367070281	4.598033611	-13.34774388	3.10E-07	2.02E-06	7.40043715
CDKL2	-2.274911169	5.220602711	-9.047624474	8.19E-06	2.41E-05	3.954412061
CDKL5	-2.75418699	4.765766139	-17.82427396	2.51E-08	5.26E-07	9.953396585
CDKN1A	-2.413625796	9.463883703	-5.071648662	0.000670923	0.001095309	-0.754738388
CDKN2AIPNL	-2.15180833	6.376064122	-9.018396089	8.41E-06	2.47E-05	3.926203739
CDKN2B	-2.809716377	4.924182638	-7.075298764	5.83E-05	0.00012615	1.857256215
CDRT1	-2.403224829	4.802965768	-14.19447171	1.83E-07	1.46E-06	7.947953051
CDS1	-3.825205439	5.343664097	-6.004396703	0.000201626	0.000372736	0.52889717
CDX1	-2.215596695	6.788966501	-10.47755647	2.43E-06	9.00E-06	5.245041065
CDX2	-2.446611409	5.891473835	-7.116345346	5.57E-05	0.000121464	1.905285303
CDYL2	-2.947894056	5.784852336	-7.405534311	4.09E-05	9.30E-05	2.237978713
CEACAM1	-2.990895848	5.350850235	-11.13750611	1.45E-06	6.08E-06	5.787215485
CEACAM3	-2.22345782	6.095570027	-10.85159264	1.81E-06	7.17E-06	5.55613178
CEACAM5	-3.333696001	5.637200011	-7.011821469	6.25E-05	0.000133889	1.782578443
CEACAM6	-5.029899998	5.702390373	-4.442315789	0.001619124	0.002430527	-1.690212762
CEACAM7	-2.490600909	4.389927107	-13.82293434	2.30E-07	1.68E-06	7.712000962
CEBPA	-2.819900171	6.719320609	-6.409764736	0.00012399	0.00024368	1.049256958
CEBPA-AS1	-2.708487705	7.144279208	-9.480506459	5.58E-06	1.76E-05	4.363205122
CEBPD	-2.92977285	5.548868707	-4.420617875	0.001670772	0.002499621	-1.723437548
CEBPE	-2.218349058	5.590812171	-12.4273253	5.73E-07	3.10E-06	6.763392736
CECR1	-3.496073579	5.754306696	-5.843622532	0.000245957	0.000444526	0.316339761
CECR3	-2.380984716	4.61685582	-15.77966563	7.28E-08	8.70E-07	8.88593319
CECR7	-3.023849988	5.119485059	-12.22923628	6.57E-07	3.41E-06	6.620107816
CELA1	-2.993127992	5.376006078	-13.2731683	3.26E-07	2.09E-06	7.350506571
CELA3A	-2.130614167	5.372500745	-10.50752527	2.37E-06	8.84E-06	5.270344174
CELF2-AS1	-2.672928875	5.215422015	-11.72252067	9.42E-07	4.41E-06	6.242906528
CELP	-3.47329321	5.744345016	-7.784282771	2.76E-05	6.69E-05	2.659107288
CELSR1	-2.727894582	5.043249702	-9.70828818	4.58E-06	1.50E-05	4.571775177
CELSR3-AS1	-3.163628207	5.273188273	-11.60750097	1.02E-06	4.70E-06	6.155070263
CEMIP	-3.767878697	5.666592109	-6.374717436	0.000129207	0.000252671	1.005133396
CENPB	-2.134787174	7.798448927	-4.548941281	0.001388985	0.002118534	-1.527861963
CENPT	-2.223796369	5.945544936	-7.610120472	3.30E-05	7.76E-05	2.467466566
CEP170B	-3.61671133	7.872769821	-11.71838251	9.45E-07	4.42E-06	6.239760904
CEP250	-2.529231713	6.463818852	-16.29668606	5.50E-08	7.50E-07	9.169895476
CEP89	-2.135659667	5.951680807	-13.38091324	3.04E-07	1.99E-06	7.42255326
CER1	-2.143077107	5.308407332	-10.01230478	3.55E-06	1.22E-05	4.84344616
CERCAM	-2.823746518	5.971709106	-11.75242507	9.22E-07	4.35E-06	6.265606353
CERS3	-2.40535547	4.81743823	-14.98364665	1.14E-07	1.10E-06	8.428232756
CERS4	-2.602366829	5.546722668	-9.212692742	7.06E-06	2.13E-05	4.112260886
CES2	-2.145133734	7.969572159	-6.255715883	0.000148786	0.000285895	0.854101531
CES4A	-2.645492236	6.705868849	-9.626929664	4.92E-06	1.58E-05	4.497781748
CES5A	-2.17325722	4.215455698	-15.69516634	7.63E-08	8.91E-07	8.838552194
CETN1	-3.172918737	5.849149735	-19.33102694	1.23E-08	4.25E-07	10.65397665
CETN2	-2.170079327	10.18523546	-5.179429432	0.000580286	0.000961301	-0.600121242
CETP	-2.695252707	4.559878602	-10.62521882	2.16E-06	8.20E-06	5.369071407
CFB	-2.992580218	5.769783589	-6.502407795	0.000111272	0.000221258	1.165116652
CFC1	-2.519658563	5.290598014	-13.54721391	2.73E-07	1.87E-06	7.532594016
CFD	-2.86532035	6.031877445	-4.188446295	0.002347889	0.003412095	-2.082802122
CFH	-3.905990064	5.089740179	-5.868509207	0.000238452	0.000432337	0.349475261
CFHR2	-3.43393837	4.993819023	-13.6569848	2.55E-07	1.78E-06	7.604469077
CFHR4	-2.126398992	4.543875782	-5.963612765	0.000211983	0.00038935	0.475313788
CFI	-3.529380016	4.731809551	-4.293453745	0.002011092	0.002964119	-1.91940531
CFLAR	-2.763591989	5.822491238	-6.785332551	8.05E-05	0.000166744	1.51208699
CFLAR-AS1	-2.75533672	4.540891075	-25.25450168	1.16E-09	3.61E-07	12.87310706
CGN	-2.668944242	6.380248336	-5.514839392	0.000373312	0.000645612	-0.129532415
CH25H	-3.433852241	4.180975854	-8.497207224	1.37E-05	3.70E-05	3.409695383
CHAC1	-2.434272662	6.499434741	-8.056204146	2.10E-05	5.29E-05	2.951682785
CHAD	-3.217497378	5.283443131	-26.81058061	6.79E-10	3.61E-07	13.3453097
CHADL	-2.356373719	5.197188337	-10.2653396	2.88E-06	1.03E-05	5.063928776
CHAT	-2.131860747	5.609419867	-5.232928	0.000540286	0.000900726	-0.523989002
CHCHD7	-2.684701189	7.691512091	-7.274919505	4.70E-05	0.000104841	2.088937796
CHDC2	-2.493387352	5.255827223	-13.6556934	2.55E-07	1.78E-06	7.603626979
CHGA	4.658589053	9.372087182	6.640010319	9.49E-05	0.000192151	1.335146946
CHI3L1	-3.152152972	4.7214392	-9.267232876	6.73E-06	2.05E-05	4.163877438
CHI3L2	-2.73939281	4.949305171	-21.02903805	5.85E-09	3.69E-07	11.36937476
CHIA	-2.286144348	5.226990997	-9.885775149	3.94E-06	1.33E-05	4.731291881
CHIC2	-2.282393564	9.101788094	-10.95979278	1.66E-06	6.72E-06	5.6442515
CHKB	-2.176926828	8.472942987	-7.361422276	4.28E-05	9.69E-05	2.187866541
CHKB-AS1	-2.422846798	6.085046721	-15.00461424	1.13E-07	1.10E-06	8.440622884
CHL1	-2.285912377	3.714251201	-3.685734462	0.005032831	0.00688418	-2.883059298
CHMP1B	-2.163322826	7.875831906	-6.446345077	0.000118788	0.000234471	1.095138497
CHMP2B	-2.652232298	8.485991053	-6.715638386	8.71E-05	0.00017838	1.427563634
CHMP4C	-5.151487539	5.233220999	-10.91670942	1.72E-06	6.90E-06	5.609262424
CHP2	-4.269370014	5.871915455	-8.667895291	1.16E-05	3.23E-05	3.581720042
CHPF	-2.615015114	7.819732513	-4.951816361	0.000789955	0.001270385	-0.928583166
CHRD	-2.667514908	5.423869966	-14.80890965	1.26E-07	1.17E-06	8.324249048
CHRM2	-2.246625121	4.900875857	-9.286108748	6.62E-06	2.02E-05	4.181679927
CHRM4	-2.843502913	5.719368953	-15.55705607	8.24E-08	9.29E-07	8.760506725
CHRM5	-2.180401878	4.771920333	-9.552625434	5.24E-06	1.67E-05	4.429717216
CHRNA3	2.698655078	9.488507644	8.317894646	1.62E-05	4.27E-05	3.225864821
CHRNB1	-2.644376807	6.45730303	-4.277680576	0.002058208	0.003027238	-1.943859473
CHRNB3	-2.38177408	4.207922543	-15.44073537	8.80E-08	9.64E-07	8.694186455
CHRNG	-2.203237828	6.133172329	-15.27485933	9.66E-08	1.02E-06	8.598667911
CHST3	-2.339311348	6.777120998	-6.501278942	0.000111419	0.000221505	1.163711644
CHST4	-3.808270388	5.512367433	-15.41848143	8.91E-08	9.73E-07	8.681436487
CHST5	-2.801993008	5.887178817	-23.51265176	2.18E-09	3.61E-07	12.29578553
CHST6	-3.693621356	5.341945864	-5.252459614	0.000526433	0.000880286	-0.496295694
CHST7	-3.691205242	6.316367109	-9.676736559	4.71E-06	1.53E-05	4.543145555
CHST9	-4.021254137	4.646913615	-3.447521538	0.007306137	0.009704359	-3.271044265
CHSY3	-2.801420072	4.381740223	-10.24232232	2.94E-06	1.05E-05	5.044078809
CIB1	-2.701688338	9.111210672	-5.664172749	0.000308299	0.000543789	0.074860564
CIB3	-2.161414018	4.76514068	-14.81503132	1.26E-07	1.16E-06	8.327914124
CIB4	-2.413955919	4.560110698	-13.32478114	3.15E-07	2.04E-06	7.38509341
CIDEB	-2.342486307	6.28147474	-5.698118663	0.000295302	0.000523172	0.120885186
CIDEC	-2.497410051	6.205786757	-20.63234954	6.92E-09	3.75E-07	11.20869936
CIITA	-2.146042336	5.25530268	-19.68296376	1.05E-08	4.12E-07	10.80834465
CILP	-2.743106614	6.191195214	-12.76586775	4.55E-07	2.63E-06	7.003079836
CILP2	-2.723082834	5.215620731	-7.228380078	4.94E-05	0.000109423	2.035348554
CIRBP-AS1	-2.116104863	5.431986595	-13.8812303	2.21E-07	1.64E-06	7.749457675
CITED2	-3.796065121	6.768079497	-5.145431606	0.00060736	0.001001045	-0.648714351
CLASRP	-2.64054679	8.474062718	-8.414025489	1.48E-05	3.95E-05	3.324819423
CLC	-2.543578814	4.655114542	-19.34041521	1.22E-08	4.25E-07	10.65813803
CLCA2	-3.681755166	4.190956037	-4.529784942	0.001427602	0.002172677	-1.556916637
CLCA4	-4.283996819	4.159297536	-4.0625212	0.002832783	0.004048332	-2.280557554
CLCF1	-3.243341011	6.870044201	-11.50174286	1.11E-06	4.96E-06	6.07356008
CLCNKB	-2.646474815	5.816631016	-20.12299957	8.63E-09	3.91E-07	10.99675432
CLDN1	-4.390728513	4.945144311	-6.082156238	0.000183371	0.000342674	0.630430791
CLDN10	-3.78500353	5.200173357	-9.196531462	7.17E-06	2.16E-05	4.096914944
CLDN10-AS1	-2.275108868	3.985189271	-19.03489989	1.41E-08	4.37E-07	10.52147037
CLDN14	-2.21810041	4.315072924	-12.8010774	4.44E-07	2.59E-06	7.027641012
CLDN16	-2.47511205	6.428638693	-13.74227083	2.41E-07	1.73E-06	7.659900869
CLDN17	-3.800290436	5.890109971	-18.08050461	2.21E-08	4.98E-07	10.07730531
CLDN19	-2.24060736	5.910128241	-12.11273428	7.13E-07	3.61E-06	6.534760619
CLDN2	-2.789268046	5.355093818	-13.73450601	2.43E-07	1.74E-06	7.654868885
CLDN23	-2.402568471	3.924438778	-7.841803808	2.60E-05	6.37E-05	2.721664606
CLDN3	-3.065732876	5.270651711	-4.873716388	0.000879661	0.001400653	-1.042980863
CLDN4	-2.543956444	5.788429042	-6.2658436	0.000146999	0.000282896	0.867028498
CLDN6	-2.529187535	5.802193686	-15.73814783	7.45E-08	8.78E-07	8.862687854
CLDN7	-3.89459484	5.85307427	-4.684604908	0.001145565	0.001777952	-1.323537521
CLDN8	-3.730163192	4.285815138	-4.8759177	0.000876988	0.001396614	-1.039744667
CLDN9	-2.543805481	5.70230136	-9.350703057	6.25E-06	1.94E-05	4.242363154
CLDND2	-2.425665198	4.97884358	-12.58322249	5.15E-07	2.88E-06	6.874569234
CLEC14A	-2.55778243	5.629587831	-7.972322482	2.28E-05	5.69E-05	2.862277839
CLEC1A	-3.694819269	4.630911815	-25.32328956	1.13E-09	3.61E-07	12.89481093
CLEC1B	-3.15334861	4.74765768	-21.87518331	4.13E-09	3.61E-07	11.69987733
CLEC3A	-2.962442539	4.774707616	-23.3732441	2.30E-09	3.61E-07	12.24715757
CLEC4F	-3.136117692	5.611265691	-20.38950546	7.69E-09	3.81E-07	11.10845499
CLEC4GP1	-3.997667199	4.728236651	-24.11027626	1.74E-09	3.61E-07	12.50006126
CLEC4M	-2.345894043	4.795074262	-18.89573692	1.50E-08	4.44E-07	10.45835356
CLIC3	-2.133402408	4.375031158	-4.922438533	0.000822487	0.001317408	-0.971513425
CLIC5	-2.524372068	4.937096156	-14.48863968	1.53E-07	1.31E-06	8.130217053
CLIC6	-3.979100079	5.197867687	-6.224465178	0.000154448	0.000295478	0.814126894
CLIP1-AS1	-2.227931146	4.336115909	-10.38716472	2.61E-06	9.52E-06	5.168314802
CLMN	-2.705110354	5.704923933	-4.300314048	0.00199096	0.002936774	-1.908779341
CLN5	-2.227459972	7.436167558	-8.600502552	1.24E-05	3.42E-05	3.514140261
CLN6	-2.213051446	6.245667298	-8.626391228	1.21E-05	3.35E-05	3.540153044
CLPS	-2.134859277	5.426341273	-13.51696205	2.78E-07	1.89E-06	7.51268024
CLPTM1	-2.138523506	8.274543661	-5.50400115	0.000378578	0.000653504	-0.144489164
CLRN3	-2.121418197	4.000694739	-15.83462962	7.06E-08	8.57E-07	8.916604013
CLSTN1	-2.501588154	9.218712384	-7.508484696	3.67E-05	8.48E-05	2.354057649
CLTCL1	-3.086581127	6.344985116	-10.26731814	2.88E-06	1.03E-05	5.065633151
CLUL1	-2.316345086	4.320649982	-16.19077958	5.82E-08	7.68E-07	9.112546381
CLYBL-AS1	-2.40258639	4.092177877	-21.08294757	5.72E-09	3.69E-07	11.39092174
CMAHP	-2.400018951	4.593100625	-4.573611561	0.001340894	0.002051092	-1.490517863
CMIP	-2.536652635	6.914026077	-9.087202244	7.90E-06	2.34E-05	3.992483979
CMKLR1	-2.415830543	5.452258563	-15.99979383	6.45E-08	8.15E-07	9.008069609
CMTM2	-2.250681489	4.542392891	-12.44395777	5.66E-07	3.08E-06	6.775320123
CMTM4	-2.43317141	7.43633588	-6.671423411	9.16E-05	0.000186235	1.373621878
CMTM8	-2.873897972	6.879394062	-3.781684305	0.004339846	0.006008994	-2.728209923
CMYA5	-2.467239313	5.177992967	-22.83474119	2.82E-09	3.61E-07	12.05573123
CNDP1	-2.986383088	4.40770388	-22.49840368	3.22E-09	3.61E-07	11.93320127
CNGA1	-2.991173578	5.002514078	-13.89928879	2.19E-07	1.63E-06	7.76102753
CNGA4	-2.298429545	5.101000963	-4.57715616	0.001334132	0.002041817	-1.485159131
CNGB3	-2.103000277	4.143398416	-16.23024851	5.70E-08	7.63E-07	9.133967553
CNKSR1	-2.335768064	5.654851832	-6.664150186	9.23E-05	0.000187584	1.364724798
CNN2	-4.129775417	7.898061373	-6.859363345	7.40E-05	0.000155126	1.601201093
CNNM1	-2.199331804	5.82740254	-3.722376388	0.004755343	0.006533886	-2.823818878
CNNM2	-2.100579837	6.037797421	-10.40766617	2.57E-06	9.40E-06	5.185770701
CNNM3	-2.581592378	7.671963666	-10.80033495	1.88E-06	7.40E-06	5.514097936
CNNM4	-2.377212888	6.960770671	-11.34409919	1.24E-06	5.40E-06	5.950710188
CNOT1	-2.311894126	8.358049475	-7.196599049	5.11E-05	0.000112476	1.998605695
CNOT3	-2.214706137	5.939359934	-9.299748464	6.54E-06	2.01E-05	4.1945244
CNR2	-3.156782814	5.803387313	-15.05720185	1.09E-07	1.09E-06	8.471616211
CNTF	-2.399692756	5.313022734	-11.03842844	1.57E-06	6.43E-06	5.707779898
CNTFR-AS1	-2.174270342	4.387665209	-10.55464743	2.28E-06	8.57E-06	5.309995238
CNTNAP5	-2.170541441	4.681878615	-8.846481644	9.84E-06	2.81E-05	3.758688285
COBL	-4.667504875	4.973097504	-11.88991441	8.35E-07	4.05E-06	6.369252859
COL11A2	-2.208833304	6.338643149	-17.25525681	3.33E-08	5.96E-07	9.67075828
COL12A1	-3.546999746	4.672804545	-7.075359311	5.83E-05	0.00012615	1.857327213
COL13A1	-2.410599742	6.236880317	-5.339556679	0.000469166	0.00079416	-0.373464198
COL14A1	-2.404641083	4.232474399	-14.70260823	1.35E-07	1.21E-06	8.26034681
COL17A1	-2.909439654	5.466714687	-6.720663047	8.66E-05	0.000177524	1.433677954
COL1A1	-2.898939688	6.290613835	-5.650854885	0.000313566	0.000552039	0.056759785
COL22A1	-2.185329982	4.90084261	-11.0887289	1.51E-06	6.25E-06	5.748192486
COL27A1	-2.744243014	5.659103499	-15.30130761	9.52E-08	1.01E-06	8.613973056
COL4A1	-4.246540977	7.050612578	-3.501635598	0.006708993	0.008971683	-3.182507745
COL4A4	-2.93478306	4.256453382	-11.0661464	1.53E-06	6.33E-06	5.730070709
COL4A5	-4.278405093	4.590968789	-29.6320308	2.78E-10	3.61E-07	14.11080672
COL4A6	-3.203742812	4.548801722	-10.37365531	2.64E-06	9.60E-06	5.156794897
COL5A2	-4.669195409	5.603359793	-6.026256697	0.000196302	0.000364079	0.557523917
COL6A3	-2.643523728	5.296956497	-6.101605773	0.000179092	0.000335963	0.65569819
COL7A1	-2.559249069	6.586571584	-8.60358489	1.23E-05	3.41E-05	3.517240805
COL8A1	-2.913857921	4.027291902	-3.774394822	0.004388782	0.006070179	-2.739942265
COL8A2	-2.89850526	5.245790512	-18.71019298	1.64E-08	4.57E-07	10.37334283
COL9A2	-2.575867193	5.716833329	-15.06967246	1.09E-07	1.08E-06	8.478948893
COLCA2	-3.299707128	5.342905528	-4.94526521	0.000797088	0.001281038	-0.938145875
COLEC12	-2.515354823	5.145429512	-5.529596558	0.000366269	0.000634398	-0.109194251
COMP	-2.309534726	5.167355184	-9.672881588	4.73E-06	1.54E-05	4.539641895
COMT	-2.190214715	8.000010482	-7.606984163	3.31E-05	7.78E-05	2.46398444
COMTD1	-2.787098832	7.383565207	-7.027810221	6.14E-05	0.000131869	1.801434597
COPG2IT1	-2.212230783	5.392414797	-3.515436497	0.006565033	0.008797669	-3.159962789
COPRS	-2.200153689	10.18745764	-8.834359238	9.95E-06	2.84E-05	3.74677172
COPS7A	-2.25848252	8.952543333	-7.330888212	4.42E-05	9.96E-05	2.153046452
COPZ2	-2.323218682	6.3210484	-9.301132513	6.53E-06	2.00E-05	4.195826835
CORO1B	-2.520263165	7.870831791	-14.88309766	1.21E-07	1.14E-06	8.368556997
CORO2B	-2.953131106	5.206030363	-4.351279454	0.001847965	0.00274206	-1.830029745
CORT	-2.377946173	5.576904404	-7.651766676	3.16E-05	7.49E-05	2.513599937
COTL1	-3.794224721	6.590263347	-6.19304836	0.000160377	0.000305565	0.773807912
COX6A2	-2.467623955	5.589011599	-14.90688676	1.19E-07	1.14E-06	8.382714746
COX6B2	-2.974155203	6.009260174	-10.05075303	3.44E-06	1.19E-05	4.877272409
CP	-3.912443153	4.843580455	-4.022827201	0.003006871	0.004276509	-2.343289448
CPA3	-3.413604374	4.772196631	-18.78956495	1.58E-08	4.51E-07	10.40982964
CPA4	-4.967437427	6.518533463	-8.909428299	9.29E-06	2.68E-05	3.820343904
CPAMD8	-2.104175204	5.530531899	-9.443921773	5.76E-06	1.81E-05	4.329294004
CPB1	-2.621228559	4.554261226	-14.56088611	1.46E-07	1.27E-06	8.174382216
CPD	-2.76024211	7.265060496	-7.791379456	2.74E-05	6.65E-05	2.66684493
CPLX3	-2.388331516	5.869323752	-12.14379286	6.97E-07	3.56E-06	6.557592498
CPM	-2.510072192	4.653683942	-20.84128304	6.33E-09	3.70E-07	11.29379546
CPN1	-2.292411944	5.445607103	-13.59784208	2.64E-07	1.83E-06	7.565818444
CPN2	-2.210383682	3.994807962	-16.8336088	4.14E-08	6.48E-07	9.45439463
CPNE5	-2.714429112	5.043162737	-11.67293855	9.76E-07	4.52E-06	6.205145477
CPNE9	-2.34671325	5.38996296	-8.450980652	1.43E-05	3.84E-05	3.362612531
CPQ	-3.698760867	5.030342093	-12.47178367	5.55E-07	3.03E-06	6.795239009
CPS1	-3.171236976	5.456613494	-6.565442503	0.000103436	0.00020747	1.243309472
CPSF1	-3.084765831	5.668515941	-10.7670986	1.93E-06	7.55E-06	5.486742364
CPXM2	-2.626207992	5.528777653	-14.47324781	1.54E-07	1.32E-06	8.120777652
CRB3	-2.514539685	6.650812297	-10.34032442	2.71E-06	9.83E-06	5.128313414
CREB3	-2.430183148	8.80135064	-6.874067078	7.28E-05	0.000152908	1.618819168
CREB3L1	-3.630973318	6.0401628	-8.927179305	9.14E-06	2.65E-05	3.837663785
CREB3L2	-2.462365933	6.619860915	-10.58430202	2.23E-06	8.42E-06	5.334864047
CRHBP	-2.761565346	4.404139749	-23.27653233	2.38E-09	3.61E-07	12.21320096
CRHR2	-2.131038044	4.73181277	-14.85360136	1.23E-07	1.15E-06	8.350969015
CRIM1	-4.874239422	5.690586453	-4.981826938	0.000758149	0.001223648	-0.884854501
CRIP3	-2.761017301	5.156696397	-9.095373109	7.85E-06	2.32E-05	4.000326175
CRISP2	-2.118014096	3.846439022	-4.12606184	0.002576025	0.003715396	-2.180530144
CRISPLD2	-2.647019639	6.023349736	-5.825939448	0.000251445	0.000453484	0.292743378
CRLF1	-2.811901913	6.528902839	-4.930838933	0.00081304	0.00130391	-0.959225323
CRMP1	2.33179725	9.784837451	4.494378664	0.001502034	0.002272434	-1.610748812
CROCC	-2.292658414	5.934576462	-8.740686882	1.09E-05	3.05E-05	3.654220135
CRTAC1	-2.654755087	5.519948855	-14.98563028	1.14E-07	1.10E-06	8.429405716
CRX	-2.456761533	4.581815025	-12.11295551	7.13E-07	3.61E-06	6.534923454
CRY2	-2.136105109	7.15066833	-14.72010236	1.33E-07	1.21E-06	8.270897071
CRYAA	-2.445206788	5.399612941	-12.29939168	6.26E-07	3.30E-06	6.671115404
CRYAB	-3.979308993	5.384884135	-11.07453376	1.52E-06	6.30E-06	5.736805407
CRYBA4	-2.420462469	4.801089201	-8.353963097	1.57E-05	4.15E-05	3.263102316
CRYBB1	-2.441356027	5.635122577	-6.881300709	7.23E-05	0.000151911	1.627476669
CRYGD	-2.335800807	6.658476519	-4.168129476	0.00241973	0.003507032	-2.114576486
CRYL1	-3.324224584	6.600076514	-7.909147315	2.43E-05	5.99E-05	2.794446302
CRYM	-2.543835901	7.218098484	-8.193064799	1.83E-05	4.73E-05	3.0959623
CSDC2	-2.325444439	6.363816829	-8.528721842	1.33E-05	3.61E-05	3.441672176
CSF1	-2.325641714	5.752922617	-14.70812947	1.34E-07	1.21E-06	8.263677968
CSF2	-2.235928598	5.716673254	-14.39144953	1.62E-07	1.36E-06	8.070434223
CSF2RB	-3.036315967	4.305238501	-25.01596549	1.26E-09	3.61E-07	12.79722369
CSHL1	-2.525279268	4.67083208	-19.37489176	1.21E-08	4.24E-07	10.67339925
CSMD2	-2.641618056	4.814991273	-21.97149936	3.97E-09	3.61E-07	11.73648209
CSMD2-AS1	-2.758823091	5.791700117	-19.58062183	1.10E-08	4.13E-07	10.76379772
CSN2	-2.114939981	4.273510483	-19.02474516	1.42E-08	4.37E-07	10.51688321
CSN3	-2.568676196	4.101710628	-18.35421405	1.94E-08	4.75E-07	10.20743955
CSNK1E	-2.646719032	7.86891189	-9.959527066	3.71E-06	1.26E-05	4.796821076
CSNK1G2-AS1	-2.974851938	5.783335507	-13.51684286	2.78E-07	1.89E-06	7.51260169
CSPG4	-3.091297189	4.919616028	-6.055111633	0.000189508	0.000352884	0.595211036
CSPG4P1Y	-2.270889206	5.387255153	-9.71031125	4.58E-06	1.50E-05	4.573608061
CSPG4P5	-2.492060929	5.56714609	-9.684709736	4.68E-06	1.53E-05	4.550388179
CSPG5	-2.450928675	5.580077515	-7.259962887	4.77E-05	0.000106365	2.071743478
CST13P	-2.833287265	3.988577196	-24.7281903	1.39E-09	3.61E-07	12.70437492
CST2	-2.133599463	5.574974956	-13.75568296	2.39E-07	1.72E-06	7.668585657
CST3	-2.381387913	6.265292287	-11.97207622	7.87E-07	3.87E-06	6.430633086
CST5	-2.881095047	5.485393375	-19.61485046	1.08E-08	4.12E-07	10.77872761
CST6	-2.755477357	5.054217069	-6.587731004	0.000100811	0.000202702	1.270834828
CST7	-2.515153993	4.705923102	-18.43798438	1.86E-08	4.73E-07	10.24681706
CST8	-2.926558835	5.568123253	-20.95341923	6.04E-09	3.69E-07	11.33903553
CST9L	-2.454168636	4.268578118	-14.50844789	1.51E-07	1.30E-06	8.142349253
CTAGE1	-2.586171586	3.879103504	-19.15331256	1.33E-08	4.30E-07	10.57474751
CTB-113P19.1	-2.208845498	4.81934228	-11.44985893	1.15E-06	5.09E-06	6.033307232
CTBP1-AS	-2.303435599	4.440971715	-10.27063894	2.87E-06	1.03E-05	5.068493117
CTBP1-AS2	-2.821180085	6.46084298	-15.33362846	9.34E-08	9.98E-07	8.63263772
CTBS	-2.401800983	6.687607281	-3.888415535	0.003685709	0.005158077	-2.557058005
CTC1	-2.246254074	5.952049794	-12.17499277	6.82E-07	3.50E-06	6.580470353
CTC-360P9.3	-2.98670387	5.484046875	-20.50572188	7.31E-09	3.77E-07	11.15660939
CTF1	-3.198884834	6.075718744	-13.80704705	2.32E-07	1.69E-06	7.701764465
CTGF	-7.559027042	5.769461119	-8.348223678	1.57E-05	4.17E-05	3.257185704
CTLA4	-2.24713009	5.041131973	-15.04210806	1.10E-07	1.09E-06	8.462732368
CTNNA1	-2.206754549	8.726695222	-6.325207011	0.000136989	0.000266083	0.942525005
CTNNA3	-2.129005574	3.999055369	-14.97713977	1.15E-07	1.11E-06	8.42438394
CTRB2	-2.530278661	5.732163005	-17.75537773	2.60E-08	5.38E-07	9.919728966
CTRC	-2.634222516	5.549752616	-11.31620298	1.27E-06	5.49E-06	5.928800476
CTSA	-2.120499181	9.229283619	-6.330953352	0.00013606	0.000264505	0.949808175
CTSC	-2.130143898	8.830451174	-4.058363371	0.002850506	0.004071953	-2.287119802
CTSD	-3.690733826	7.753760569	-4.369499421	0.00179954	0.002676027	-1.801959282
CTSE	-2.58090244	5.30945815	-11.10567566	1.49E-06	6.19E-06	5.761768771
CTSG	-2.436579019	5.72467043	-14.49382514	1.52E-07	1.31E-06	8.133394759
CTSH	-3.851969307	8.216793239	-5.539959347	0.00036141	0.000626883	-0.094930757
CTSLP8	-2.435216652	5.785964771	-7.219960424	4.98E-05	0.000110218	2.025626072
CTSO	-3.750904678	6.069353709	-5.611757407	0.000329601	0.000577238	0.003477124
CTSS	-3.88611914	4.913226459	-4.160438511	0.002447533	0.003543603	-2.126618093
CTSW	-2.689420894	5.736828395	-13.77122991	2.37E-07	1.71E-06	7.678641813
CTSZ	-2.588649048	5.347254404	-13.44457167	2.92E-07	1.94E-06	7.46484117
CTTNBP2	-3.500986812	3.888363178	-18.95397148	1.46E-08	4.42E-07	10.48483222
CTXN1	-2.818525863	7.517129063	-5.098839389	0.000646701	0.0010594	-0.715575924
CUBN	-2.242154802	5.122516708	-9.868031137	4.00E-06	1.34E-05	4.715460488
CUEDC1	-2.313849136	7.047103285	-4.462995167	0.001571487	0.002367898	-1.658606125
CUL4B	-2.552559958	7.929612584	-6.000396104	0.000202617	0.000374399	0.523651116
CWH43	-2.50049848	4.309088364	-4.101278809	0.002673099	0.003844024	-2.219486322
CX3CR1	-2.341132377	4.413448024	-17.65090967	2.73E-08	5.50E-07	9.868390958
CXCL10	-2.688167127	4.932248737	-17.53007414	2.90E-08	5.63E-07	9.808573345
CXCL13	-2.51166098	3.874365636	-7.706451977	2.98E-05	7.14E-05	2.573882542
CXCL14	-2.549778944	4.603113018	-10.63004072	2.15E-06	8.17E-06	5.373094549
CXCL16	-3.927730736	5.959494545	-7.210861177	5.03E-05	0.00011103	2.015109367
CXCL2	-2.36106378	4.227896923	-10.00801511	3.56E-06	1.22E-05	4.839664876
CXCL3	-2.627051106	4.276794844	-8.282347849	1.68E-05	4.40E-05	3.189036316
CXCL8	-4.188151783	5.069624719	-3.827700728	0.004043923	0.005625527	-2.654272356
CXCL9	-3.468356232	4.746662898	-18.27337037	2.02E-08	4.80E-07	10.16923865
CXCR3	-2.528081586	5.485042289	-11.00230608	1.61E-06	6.56E-06	5.67865058
CXCR5	-2.488148053	5.115756196	-12.54859118	5.27E-07	2.92E-06	6.849991597
CXorf22	-3.503216597	4.027108594	-7.916292303	2.41E-05	5.96E-05	2.802139456
CXorf30	-3.729380996	4.456929718	-10.01045152	3.55E-06	1.22E-05	4.841812714
CXorf36	-2.435310518	5.453664037	-17.3204118	3.23E-08	5.89E-07	9.703657106
CXorf57	-2.868787519	4.209826446	-6.980691968	6.47E-05	0.000137921	1.745776582
CXorf58	-2.819889578	4.153012561	-9.419249918	5.89E-06	1.84E-05	4.306359852
CYAT1	-2.66412952	5.79201977	-13.50613713	2.80E-07	1.89E-06	7.505543402
CYB561A3	-3.815956513	7.98566068	-11.64401489	9.97E-07	4.60E-06	6.183045675
CYB561D2	-2.430384002	6.7786909	-13.80221068	2.33E-07	1.69E-06	7.698645868
CYB5D1	-2.630525048	7.626359045	-4.711787337	0.001102538	0.001716522	-1.282903431
CYB5D2	-2.242103683	7.667467464	-7.598655697	3.34E-05	7.84E-05	2.454732277
CYB5R1	-2.701989987	6.987629347	-12.94293253	4.04E-07	2.42E-06	7.125909035
CYB5R2	-2.423819807	4.515367156	-4.193655761	0.002329837	0.003387784	-2.074663095
CYB5R3	-2.688774623	9.554930134	-6.076673384	0.000184598	0.000344777	0.623298594
CYBRD1	-3.723507229	6.391495262	-4.610277142	0.001272686	0.001955971	-1.435169941
CYLC1	-2.222549471	4.276324607	-20.24616192	8.18E-09	3.85E-07	11.04859751
CYLC2	-2.226188592	3.878904718	-13.8036088	2.32E-07	1.69E-06	7.699547524
CYP11B2	-2.303689073	6.352807194	-5.476540992	0.000392283	0.000674657	-0.182458499
CYP1B1	-3.848257973	5.342626587	-6.012336775	0.000199675	0.000369529	0.53930264
CYP1B1-AS1	-2.145212889	4.648305032	-20.83434941	6.35E-09	3.70E-07	11.29098833
CYP24A1	-3.172069241	3.70951682	-6.436729159	0.000120132	0.000236803	1.083094552
CYP26A1	-4.388204638	5.861584203	-8.193432156	1.83E-05	4.73E-05	3.096346941
CYP26B1	-2.364070049	5.423465659	-11.60593059	1.03E-06	4.70E-06	6.153865191
CYP27A1	-2.449717949	6.801893829	-13.74588132	2.41E-07	1.73E-06	7.662239642
CYP27B1	-2.364649205	5.9056861	-5.7673454	0.000270603	0.000484363	0.214244874
CYP2A6	-2.590822005	6.157658591	-17.34774183	3.18E-08	5.83E-07	9.717415031
CYP2A7	-3.029938792	5.160412795	-10.57323778	2.25E-06	8.47E-06	5.325592976
CYP2B6	-2.531265874	4.915603329	-15.32367715	9.40E-08	1.00E-06	8.626895571
CYP2B7P	-4.07086685	6.113351644	-8.513930907	1.34E-05	3.65E-05	3.426676564
CYP2C18	-2.908867714	4.579700661	-9.083202324	7.93E-06	2.35E-05	3.988642739
CYP2C19	-2.563934102	4.9661786	-21.85823338	4.16E-09	3.61E-07	11.69341454
CYP2C8	-2.223558803	4.020988221	-12.80068512	4.44E-07	2.59E-06	7.027367749
CYP2C9	-2.649417493	4.794610951	-22.34560402	3.42E-09	3.61E-07	11.87676035
CYP2E1	-2.384250011	4.603973782	-15.89216691	6.84E-08	8.42E-07	8.948585894
CYP2F1	-4.567597657	4.923619654	-5.053079623	0.000688026	0.001120816	-0.781543572
CYP2J2	-2.933548848	6.296908203	-10.13787533	3.20E-06	1.12E-05	4.953488884
CYP2S1	-3.192431768	5.379973616	-7.095015278	5.71E-05	0.000123812	1.880352143
CYP39A1	-3.212417929	4.511079096	-8.487572843	1.38E-05	3.73E-05	3.39990007
CYP3A4	-2.432296247	5.312208395	-20.21057471	8.31E-09	3.85E-07	11.03365707
CYP3A43	-2.603217976	4.461946671	-22.69488288	2.98E-09	3.61E-07	12.00506222
CYP46A1	-2.586441171	5.194068664	-10.76980634	1.93E-06	7.54E-06	5.488973963
CYP4A11	-2.411187972	5.225412487	-21.2980971	5.23E-09	3.69E-07	11.47623944
CYP4F11	-2.442601579	3.998636372	-3.764871167	0.004453596	0.006149431	-2.755278538
CYP4F12	-2.484632081	6.84216164	-5.581677108	0.000342542	0.000597499	-0.037663123
CYP4F2	-2.807742319	5.418087139	-21.50314245	4.81E-09	3.68E-07	11.55655905
CYP4F22	-2.379270315	4.505077536	-19.89257946	9.55E-09	4.01E-07	10.89872258
CYP4F3	-3.386405485	4.172981179	-5.817838294	0.000254004	0.000457494	0.281918676
CYP4V2	-2.123534974	5.900789203	-4.571546676	0.00134485	0.002056682	-1.493640351
CYP4Z1	-3.053457867	3.898892818	-7.093734374	5.71E-05	0.000123972	1.87885312
CYR61	-4.664267352	7.006136138	-3.721692061	0.004760375	0.006539922	-2.82492408
CYSTM1	-2.658784639	9.448139497	-4.883328399	0.000868052	0.001383244	-1.028855065
CYTH4	-2.366671933	5.734300785	-12.50105737	5.44E-07	2.99E-06	6.816146504
CYTIP	-2.158993185	3.874671323	-16.82502124	4.16E-08	6.50E-07	9.449924696
D21S2088E	-2.273450202	4.556711012	-16.23463954	5.68E-08	7.62E-07	9.136347154
DAAM1	-2.499756914	6.578554141	-10.48273148	2.42E-06	8.98E-06	5.249415183
DAAM2	-3.093324707	6.470893481	-5.560336469	0.000352057	0.000612529	-0.066927601
DAB2	-3.104463344	4.546781614	-20.91589748	6.14E-09	3.69E-07	11.3239311
DAG1	-2.237803295	8.227660495	-7.295358051	4.59E-05	0.00010296	2.112391554
DAGLA	-2.243316169	6.384103775	-9.06489661	8.06E-06	2.38E-05	3.971044617
DAGLB	-2.326977874	6.563762743	-8.871124668	9.62E-06	2.76E-05	3.782870185
DAK	-2.59862799	6.059658773	-18.27946089	2.01E-08	4.80E-07	10.17212344
DALRD3	-2.608460401	7.174956656	-7.117193846	5.57E-05	0.000121401	1.906275998
DAND5	-2.306812061	5.175240038	-6.857617341	7.42E-05	0.000155382	1.599107235
DAO	-2.333088701	5.610162982	-10.57697026	2.24E-06	8.45E-06	5.328721545
DAPL1	-2.830301679	5.288061058	-5.299101866	0.000494881	0.000833657	-0.430382687
DAPP1	-3.3027433	5.467291291	-6.587292457	0.000100862	0.000202784	1.270293858
DAW1	-4.578643362	4.788788429	-4.787820376	0.000991141	0.001559467	-1.169791125
DCAF11	-2.515374498	7.459436966	-12.92932448	4.08E-07	2.44E-06	7.116529588
DCAF15	-2.259106038	6.754225282	-5.995484246	0.000203842	0.000376593	0.517207119
DCBLD1	-3.730078023	6.113972336	-5.126464956	0.000623054	0.001024478	-0.67589491
DCBLD2	-2.415424974	7.374981757	-4.512729001	0.001462952	0.002219872	-1.582827535
DCD	-2.148484907	5.159542142	-16.26944601	5.58E-08	7.55E-07	9.155184357
DCSTAMP	-3.175110117	4.949488151	-18.80412646	1.57E-08	4.49E-07	10.4165038
DCX	2.805829595	6.913849963	6.843905489	7.53E-05	0.000157466	1.582650389
DDI1	-2.229494839	4.280045417	-12.5714305	5.19E-07	2.89E-06	6.86620813
DDIT4	-3.324210436	9.266979056	-3.652499923	0.005299272	0.007216308	-2.936899529
DDIT4L	-3.359408278	5.188260863	-27.31074022	5.76E-10	3.61E-07	13.48913018
DDO	-2.310454374	4.973108598	-15.11576048	1.06E-07	1.07E-06	8.505991956
DDX11L2	-2.25098534	6.102532898	-15.3261782	9.38E-08	1.00E-06	8.628339116
DDX58	-2.582058499	6.195473318	-8.470108447	1.40E-05	3.78E-05	3.382120439
DDX60	-2.667481444	4.543105954	-4.840899527	0.000920574	0.001458305	-1.091306631
DEF6	-2.196609131	5.927460073	-11.6427092	9.98E-07	4.60E-06	6.182046776
DEFA4	-2.97400601	4.886381859	-17.57321777	2.84E-08	5.56E-07	9.829984914
DEFA5	-2.582647539	4.847449922	-20.72947767	6.64E-09	3.75E-07	11.24838951
DEFA6	-2.905273864	5.873595631	-20.47797336	7.40E-09	3.79E-07	11.1451421
DEFB1	-2.511033348	4.992150652	-5.374265935	0.000448254	0.000761823	-0.324814969
DEFB118	-2.510676801	6.043952096	-15.11071283	1.06E-07	1.07E-06	8.503034479
DEFB121	-2.633781668	4.430706722	-12.77114931	4.53E-07	2.63E-06	7.006768442
DEFB123	-2.941454608	4.911249832	-20.04071001	8.95E-09	3.94E-07	10.96190096
DEFB124	-2.364947684	5.846717804	-12.12769393	7.05E-07	3.59E-06	6.545765
DEFB129	-2.287822764	3.672126241	-20.30126451	7.99E-09	3.85E-07	11.07166814
DEGS2	-2.465905485	5.80590519	-5.611373638	0.000329762	0.000577472	0.002953052
DENND1C	-2.223917318	5.569300053	-11.92927502	8.12E-07	3.96E-06	6.398709448
DENND2C	-3.087430388	5.487407151	-7.367488319	4.25E-05	9.64E-05	2.194771111
DENND2D	-3.359954536	4.919361933	-10.54350718	2.30E-06	8.64E-06	5.300636087
DENND3	-2.453547183	5.890150939	-9.267400612	6.73E-06	2.05E-05	4.164035775
DEPTOR	-2.168222262	5.054183144	-4.511462014	0.001465615	0.002223419	-1.584753879
DERL3	-2.123264494	6.133066432	-11.24959208	1.34E-06	5.71E-06	5.876274463
DESI1	-2.23691018	7.929332717	-4.689325584	0.001137965	0.001766839	-1.316473379
DFFA	-2.392923024	8.500399167	-5.41117461	0.000427117	0.000728807	-0.27327073
DFNB31	-3.237333269	5.4084955	-22.7638452	2.90E-09	3.61E-07	12.03009632
DGCR11	-2.703386164	6.318923225	-12.62465113	5.00E-07	2.82E-06	6.903882098
DGCR12	-2.773685815	5.183744162	-13.29272645	3.21E-07	2.07E-06	7.363629066
DGCR9	-2.787729469	6.175320488	-21.82507547	4.21E-09	3.61E-07	11.6807536
DGKA	-3.459944357	6.23318046	-7.234719822	4.90E-05	0.000108831	2.042663735
DGKG	-2.294859302	4.884769537	-5.670059783	0.000306001	0.000540163	0.082853909
DGKQ	-2.413335994	6.269592735	-8.18604502	1.84E-05	4.76E-05	3.088609564
DGKZ	-2.419466435	6.81594743	-14.2617222	1.75E-07	1.42E-06	7.989969666
DHDDS	-2.18138362	7.146912481	-13.74943452	2.40E-07	1.73E-06	7.664540685
DHRS1	-3.235497656	7.102268741	-7.467344767	3.83E-05	8.80E-05	2.307817644
DHRS11	-2.258409016	6.458451486	-6.454239708	0.000117697	0.000232559	1.105017486
DHRS3	-4.256302334	6.834808759	-7.24253443	4.86E-05	0.000108081	2.051674144
DHRS7	-2.155908064	6.586161925	-8.780918896	1.05E-05	2.95E-05	3.694073031
DHRS7B	-2.22190824	7.944274712	-4.918674109	0.000826758	0.001323525	-0.977023261
DHRS9	-4.304030581	5.683237366	-3.772165333	0.004403865	0.006087749	-2.743531672
DHX32	-2.298180407	8.615946772	-5.06466703	0.000677299	0.001104573	-0.764810912
DHX58	-2.801596055	5.6093709	-14.39443372	1.62E-07	1.36E-06	8.072276176
DIAPH2	-2.730018775	5.602128818	-3.972384073	0.003244643	0.004583453	-2.423274311
DIAPH2-AS1	-2.23746798	4.043288624	-17.43002602	3.05E-08	5.74E-07	9.758688263
DIAPH3-AS1	-2.142800261	4.381869789	-15.50852946	8.47E-08	9.40E-07	8.732905073
DIO1	-2.89975298	4.251172305	-3.530114034	0.006415474	0.008615306	-3.136001916
DIO2	-3.043592803	5.405030973	-6.827261715	7.68E-05	0.00016008	1.562643147
DIO2-AS1	-2.257381435	4.365394605	-13.44397706	2.92E-07	1.94E-06	7.464447132
DISC1	-2.806206812	5.13350984	-22.43644257	3.30E-09	3.61E-07	11.91037316
DKFZp434E1119	-2.99623752	5.379398625	-17.81436371	2.52E-08	5.27E-07	9.948562958
DKFZP434K028	-2.257923157	5.87478643	-13.17043332	3.48E-07	2.18E-06	7.281250653
DKFZp451B082	-2.995735273	5.616319771	-18.13069985	2.16E-08	4.89E-07	10.10134103
DKFZp564H213	-2.406883027	4.710765304	-14.1097221	1.92E-07	1.51E-06	7.894704604
DKK4	-2.621041669	4.703280484	-13.50482709	2.81E-07	1.89E-06	7.504679297
DLEC1	-2.968800651	6.014749103	-9.103563948	7.79E-06	2.31E-05	4.008181448
DLEU7-AS1	-2.127373388	4.788674615	-9.917562301	3.84E-06	1.30E-05	4.759588877
DLG1-AS1	-3.515934475	4.419162916	-9.785661812	4.29E-06	1.42E-05	4.641633293
DLG3	-3.899710738	5.99511165	-13.81008143	2.31E-07	1.69E-06	7.703720525
DLG3-AS1	-2.616474098	5.509368535	-16.56340499	4.77E-08	7.00E-07	9.312509659
DLG5-AS1	-2.729940764	5.735998079	-17.05972838	3.68E-08	6.17E-07	9.571177049
DLGAP1-AS2	-2.198750716	4.443141728	-10.60961637	2.19E-06	8.28E-06	5.356041891
DLL1	-2.434428024	5.631020926	-5.840061155	0.000247052	0.000446229	0.31159093
DLX1	-3.298608921	5.322253744	-8.458218774	1.42E-05	3.81E-05	3.369998782
DLX2	-2.865497835	5.141637305	-5.832401346	0.000249425	0.000450157	0.30137119
DMBT1	-2.884304976	6.424173626	-10.3204314	2.76E-06	9.96E-06	5.111274434
DMC1	-2.965227268	4.439343901	-6.586600885	0.000100942	0.000202906	1.269440718
DMD	-2.397050323	4.563762287	-15.14904914	1.04E-07	1.06E-06	8.525469573
DMKN	-4.858800821	5.570774213	-6.839860994	7.57E-05	0.000158069	1.577791742
DMRT2	-2.610189631	4.029717265	-12.27073595	6.38E-07	3.35E-06	6.650315706
DMRT3	-2.519322022	4.616030868	-14.72572468	1.33E-07	1.20E-06	8.274284907
DMRTA1	-2.353368907	4.301157322	-7.190879274	5.14E-05	0.000113064	1.991980148
DMRTA2	-2.784355344	5.756322517	-5.509338109	0.000375975	0.000649657	-0.137122097
DMRTB1	-2.112939219	4.852662487	-17.27234722	3.31E-08	5.95E-07	9.679401417
DNAAF1	-3.060134776	5.891998936	-10.6324556	2.15E-06	8.16E-06	5.375108763
DNAAF3	-3.632328232	6.472961116	-5.753832971	0.000275242	0.000491776	0.196074456
DNAH1	-2.106167037	4.648200521	-18.19058547	2.10E-08	4.81E-07	10.12991619
DNAH10	-2.259633846	5.262277352	-8.215101179	1.79E-05	4.64E-05	3.119010738
DNAH12	-2.1740089	4.469946082	-7.122142893	5.54E-05	0.000120828	1.912052696
DNAH17-AS1	-2.859650493	4.818166129	-9.729008518	4.50E-06	1.48E-05	4.590531511
DNAH3	-2.21504621	5.531294174	-12.29808735	6.26E-07	3.31E-06	6.670169699
DNAH5	-2.704441531	4.767709037	-4.173234249	0.002401462	0.003483023	-2.10658808
DNAH7	-2.474391218	5.06887787	-13.86819347	2.23E-07	1.65E-06	7.74109539
DNAH8	-2.260413217	4.539962671	-12.12735623	7.05E-07	3.59E-06	6.545516731
DNAH9	-3.021847602	5.193983919	-5.75553864	0.000274652	0.000490923	0.198369505
DNAI1	-2.671113969	5.535327469	-6.605122296	9.88E-05	0.000199253	1.292267911
DNAI2	-3.233581786	4.809550681	-4.276812931	0.002060834	0.003030446	-1.945205567
DNAJA4	-3.455694798	5.43740294	-4.098038799	0.002686074	0.003861054	-2.224584762
DNAJB1	-2.373733794	9.210933434	-6.043861317	0.000192126	0.000357142	0.580530618
DNAJB12	-2.200059558	7.242242051	-12.43072165	5.71E-07	3.10E-06	6.765829604
DNAJB13	-3.439686177	6.159916066	-5.873274622	0.000237044	0.000429974	0.355810423
DNAJB2	-2.453971595	7.723152536	-7.608836189	3.30E-05	7.77E-05	2.466040808
DNAJB8	-2.282324572	4.739465764	-9.22019496	7.02E-06	2.12E-05	4.119376679
DNAJB8-AS1	-2.261324898	3.949505696	-12.11173627	7.13E-07	3.61E-06	6.534025999
DNAJC15	-3.422850919	5.413355033	-4.044600416	0.002910016	0.004147696	-2.308856323
DNAJC16	-2.325525273	6.617879625	-5.896808825	0.000230219	0.000418783	0.387050873
DNAJC28	-2.878105644	4.111032024	-12.62807814	4.99E-07	2.81E-06	6.906302565
DNAJC3	-2.494970809	6.884920191	-6.17527956	0.00016384	0.000310831	0.750945514
DNAJC5B	-2.914724045	5.37331653	-24.27348748	1.64E-09	3.61E-07	12.55469554
DNAJC9-AS1	-3.008867414	5.523691353	-17.15180882	3.51E-08	6.06E-07	9.618233213
DNAL4	-2.393773713	7.532964164	-5.107388641	0.000639281	0.001048421	-0.703284281
DNASE1L1	-2.150448309	7.816365718	-11.81964578	8.78E-07	4.20E-06	6.316427674
DNASE1L2	-2.245651315	6.27775377	-9.031542369	8.31E-06	2.44E-05	3.938900917
DNASE1L3	-2.844507636	4.973282606	-24.25395469	1.65E-09	3.61E-07	12.54818259
DNASE2	-2.404340275	7.733642318	-9.766887936	4.36E-06	1.44E-05	4.624728459
DNER	-5.214682859	5.339798175	-4.426092327	0.001657577	0.002482785	-1.715048914
DNM1P35	-2.106621658	4.613143199	-11.08936287	1.51E-06	6.24E-06	5.748700726
DNM1P46	-2.505506959	4.3994541	-19.80624602	9.93E-09	4.04E-07	10.86163851
DNMBP	-2.56010529	7.61431435	-6.679831242	9.07E-05	0.00018475	1.38389848
DNMT3L	-2.389546553	5.264555042	-15.00729639	1.13E-07	1.10E-06	8.442206475
DOC2B	-2.412429542	5.47036439	-9.948718336	3.74E-06	1.27E-05	4.787244851
DOCK4-AS1	-2.125502292	3.75747492	-12.88481812	4.20E-07	2.49E-06	7.085783359
DOCK6	-2.412369576	5.878864776	-13.71537283	2.46E-07	1.75E-06	7.642457038
DOCK8	-2.604217689	4.029906257	-6.740658465	8.46E-05	0.0001741	1.457977947
DOCK9	-2.403001161	5.102932787	-7.75233812	2.85E-05	6.87E-05	2.624208851
DOHH	-2.29647208	6.499621597	-9.950130062	3.74E-06	1.27E-05	4.788496133
DOK2	-2.15701871	6.132684362	-11.44531124	1.15E-06	5.10E-06	6.029770653
DOK5	-2.698440905	5.517466553	-6.982804281	6.45E-05	0.000137685	1.74827755
DOPEY2	-2.61164875	4.714828845	-9.654278683	4.80E-06	1.56E-05	4.522716826
DPAGT1	-2.214924156	8.674663689	-5.166524215	0.000590406	0.000976091	-0.618547294
DPCD	-2.602023516	9.227017326	-7.972483372	2.28E-05	5.69E-05	2.86245004
DPCR1	-2.473588817	4.776149274	-22.00683996	3.92E-09	3.61E-07	11.74986254
DPF3	-2.247687402	5.501387435	-4.706083797	0.00111142	0.001729561	-1.291420947
DPP10-AS1	-2.39052993	4.379262313	-19.7054718	1.04E-08	4.10E-07	10.81810457
DPP10-AS3	-2.878118809	4.389084126	-16.45163821	5.06E-08	7.19E-07	9.253061721
DPP4	-2.62750112	4.568976106	-19.86052971	9.69E-09	4.03E-07	10.88497845
DPP9	-2.466806593	6.404707414	-10.23195046	2.96E-06	1.05E-05	5.035120824
DPY19L2P4	-2.125356942	4.039927579	-15.35147711	9.25E-08	9.93E-07	8.642926712
DRAP1	-2.67410392	8.705504878	-4.684682264	0.00114544	0.001777952	-1.323421738
DRC1	-4.088897954	6.189335623	-7.835291892	2.62E-05	6.40E-05	2.714600695
DRD3	-2.503405034	4.113511379	-21.81020591	4.24E-09	3.61E-07	11.67506799
DRD5	-2.90303132	4.784125736	-24.32374565	1.61E-09	3.61E-07	12.57142164
DRG2	-2.554086074	7.71681449	-9.127899334	7.62E-06	2.27E-05	4.031483939
DRP2	-2.140864095	4.449460158	-18.6391466	1.69E-08	4.61E-07	10.34052866
DSC2	-3.085280395	4.733510473	-13.45213671	2.90E-07	1.94E-06	7.469852905
DSC3	-4.570602362	4.757115634	-20.20375409	8.33E-09	3.85E-07	11.03078995
DSCAM-AS1	-2.863046076	4.442136367	-16.59727844	4.69E-08	6.92E-07	9.330438301
DSCR10	-2.6073515	5.964923389	-16.65692973	4.54E-08	6.82E-07	9.361911461
DSCR4	-2.428876345	5.271786083	-13.4160605	2.97E-07	1.96E-06	7.445926859
DSCR8	-2.193197353	4.661805512	-13.71879111	2.45E-07	1.74E-06	7.644675819
DSCR9	-2.365126564	5.968725786	-12.26006323	6.43E-07	3.37E-06	6.64255663
DSEL	-2.239347329	4.731585486	-3.758863025	0.004495004	0.006202002	-2.764958325
DSG2	-7.085991922	5.60986162	-24.00331415	1.81E-09	3.61E-07	12.46399107
DSG3	-3.356489456	4.669502439	-4.841613213	0.000919662	0.001457088	-1.090254051
DSG4	-2.3702276	3.607499182	-16.99869941	3.80E-08	6.26E-07	9.539830655
DSP	-7.855395538	6.069894511	-29.84301449	2.61E-10	3.61E-07	14.16382063
DSTNP2	-2.112717721	7.223885045	-7.038603	6.07E-05	0.000130464	1.81414532
DTNA	-2.372818648	5.296949811	-7.034828418	6.09E-05	0.000130951	1.809701585
DTWD2	-3.329668856	6.429462588	-20.96662597	6.01E-09	3.69E-07	11.34434397
DTX2P1-UPK3BP1-PMS2P11	-2.50770583	8.52120446	-10.78114302	1.91E-06	7.50E-06	5.498311431
DTX4	-4.204201234	5.835068597	-7.551878056	3.50E-05	8.16E-05	2.40262094
DUOX1	-2.713526968	4.898873254	-11.94483609	8.03E-07	3.93E-06	6.410328771
DUOX2	-3.161495547	4.461934121	-6.792022203	7.99E-05	0.000165709	1.520167835
DUOXA1	-2.537516018	5.521319649	-11.46686471	1.14E-06	5.05E-06	6.046520061
DUOXA2	-2.139128969	6.770366661	-8.25015294	1.73E-05	4.51E-05	3.155568995
DUSP1	-2.904047227	7.293847325	-10.01231262	3.55E-06	1.22E-05	4.84345307
DUSP14	-2.718500956	8.652671893	-14.14476394	1.88E-07	1.49E-06	7.91676208
DUSP18	-2.290873577	6.709968623	-7.733438724	2.90E-05	6.98E-05	2.603508897
DUSP21	-3.040611451	4.544348585	-19.13176756	1.35E-08	4.31E-07	10.56508292
DUSP22	-2.620842431	7.870184231	-5.032056183	0.000707959	0.001150174	-0.81195095
DUSP23	-3.292907019	6.82826199	-3.584882194	0.005888199	0.007950021	-3.04674607
DUSP27	-2.369962347	3.98975715	-12.4717856	5.55E-07	3.03E-06	6.795240385
DUSP3	-2.713151844	7.591644909	-10.16214535	3.14E-06	1.10E-05	4.974614688
DUSP5	-2.35109467	6.813492708	-5.345514001	0.000465503	0.000788584	-0.365102117
DVL1	-2.206768666	7.931515888	-5.336135027	0.000471284	0.000797651	-0.378269331
DYDC2	-3.345862243	5.440494024	-3.809894193	0.004155824	0.005770207	-2.682857378
DYRK1B	-2.59359711	6.299366569	-13.98369369	2.08E-07	1.58E-06	7.81489776
DYSF	-2.650557838	6.029611817	-4.168573997	0.002418134	0.003505214	-2.11388073
DZANK1	-2.266826814	5.744755263	-6.14625253	0.000169673	0.000320797	0.71350615
DZIP1L	-2.131308032	6.473561926	-10.83572777	1.83E-06	7.24E-06	5.543141759
E2F4	-2.193111948	8.051942091	-11.10251174	1.49E-06	6.20E-06	5.759235603
ECE1	-2.527278339	7.368824884	-7.663210554	3.12E-05	7.42E-05	2.526242771
ECEL1	-2.446791388	6.257200889	-14.2761147	1.74E-07	1.41E-06	7.998934711
ECHDC2	-2.767346638	5.867713258	-12.86124861	4.27E-07	2.51E-06	7.069457381
ECHS1	-2.226662977	10.83253705	-11.51997414	1.09E-06	4.92E-06	6.087662826
ECM1	-3.198923281	6.682051004	-8.418798089	1.47E-05	3.94E-05	3.329707934
ECM2	-2.382777589	4.512088553	-18.52988848	1.78E-08	4.65E-07	10.28977835
ECRP	-2.79568077	5.435262565	-23.62053969	2.09E-09	3.61E-07	12.33316203
ECSCR	-2.413960729	4.899047584	-16.61922083	4.63E-08	6.89E-07	9.342030219
EDA	-2.443550814	4.939193665	-15.20965549	1.00E-07	1.04E-06	8.560812905
EDA2R	-2.620860398	6.105124798	-13.1657936	3.49E-07	2.19E-06	7.278109921
EDAR	-2.583796283	6.346094415	-11.13692406	1.45E-06	6.08E-06	5.786750791
EDARADD	-3.058253823	5.492868121	-13.73062367	2.43E-07	1.74E-06	7.652351827
EDEM1	-2.356857561	7.911368011	-3.861674795	0.003839159	0.00535707	-2.599825783
EDEM2	-2.385876797	6.997719628	-8.567578453	1.28E-05	3.50E-05	3.480963696
EDIL3	-3.206967674	5.683515461	-3.501695392	0.006708362	0.008971525	-3.182410036
EDN1	-2.442374043	5.720117608	-6.700291912	8.86E-05	0.000180996	1.408869265
EDN2	-2.829820667	5.470969158	-17.29243427	3.27E-08	5.93E-07	9.689547631
EDNRB-AS1	-2.155973196	4.356252127	-15.15922754	1.03E-07	1.05E-06	8.531415874
EFCAB1	-3.101502268	4.664411867	-6.089622111	0.000181715	0.000340076	0.640135972
EFCAB14	-2.571121399	6.283003703	-11.10092789	1.49E-06	6.20E-06	5.757967255
EFCAB4A	-2.632466799	5.911015351	-10.2851587	2.84E-06	1.02E-05	5.080988002
EFCAB4B	-2.385342751	5.25923283	-9.760559154	4.38E-06	1.45E-05	4.61902319
EFCAB5	-2.523152433	3.863747462	-22.63478428	3.05E-09	3.61E-07	11.98316621
EFEMP1	-5.673914454	4.996924923	-6.777121961	8.12E-05	0.000168076	1.502161219
EFHB	-2.385688699	4.011826222	-4.083587636	0.002744768	0.003936849	-2.247340345
EFHC2	-2.409138998	4.307775883	-3.434458938	0.007458445	0.009885484	-3.292447396
EFHD1	-2.326203289	6.585088752	-4.06351483	0.002828565	0.004043151	-2.278989624
EFHD2	-3.38096468	7.383555937	-13.72947635	2.43E-07	1.74E-06	7.651607837
EFNB1	-2.313302943	6.541045218	-5.787991881	0.000263678	0.000473342	0.241959464
EFNB2	-2.282482333	7.517945498	-4.479718406	0.00153406	0.002315407	-1.633088036
EFNB3	-2.301348589	7.148750554	-11.4670206	1.14E-06	5.05E-06	6.04664109
EGF	-2.66675565	3.724697679	-11.96173309	7.93E-07	3.89E-06	6.422928835
EGFL6	-3.74741534	4.405274758	-6.476699888	0.000114652	0.00022725	1.133078616
EGFL7	-2.144479953	6.690828918	-8.917530617	9.22E-06	2.66E-05	3.828253085
EGFLAM-AS4	-2.140006556	3.884445553	-18.63588149	1.70E-08	4.61E-07	10.33901707
EGFR	-2.294794437	6.574828935	-5.765850694	0.000271112	0.00048515	0.212236167
EGLN3	-2.635470812	6.250159121	-3.571465369	0.006013016	0.008108378	-3.068588757
EGOT	-2.441452356	4.524473734	-13.94907205	2.12E-07	1.60E-06	7.792842123
EGR3	-2.604035988	4.694359719	-8.725795893	1.10E-05	3.09E-05	3.639430225
EHBP1L1	-2.707103599	5.602513427	-8.185587536	1.85E-05	4.76E-05	3.088130203
EHD1	-2.655934625	7.217451883	-7.591180827	3.36E-05	7.88E-05	2.446421717
EHD2	-3.398202342	7.307770094	-5.51183115	0.000374766	0.000647962	-0.133682116
EHD4	-2.450403711	5.432177636	-9.364694996	6.17E-06	1.92E-05	4.255459613
EHF	-3.077482889	4.448383022	-3.759182634	0.004492791	0.006199367	-2.764443309
EHMT1-IT1	-2.288651498	5.352539737	-14.96611301	1.15E-07	1.11E-06	8.41785752
EIF1B-AS1	-2.394855319	6.202751708	-15.35132981	9.25E-08	9.93E-07	8.642841853
ELAC2	-2.157876496	6.966250431	-8.036036095	2.14E-05	5.38E-05	2.930255007
ELAVL4	3.277516358	7.492827959	7.119246221	5.56E-05	0.000121197	1.908671958
ELF1	-3.133636556	7.263852622	-5.123378505	0.000625649	0.001028042	-0.68032286
ELF4	-3.613156818	6.648729283	-7.47983357	3.78E-05	8.70E-05	2.321875176
ELF5	-2.651163185	4.509643153	-10.53978528	2.31E-06	8.65E-06	5.297507197
ELFN1-AS1	-2.799374603	5.837188485	-8.136648325	1.94E-05	4.95E-05	3.036725042
ELFN2	-2.940594464	5.237621578	-17.64632703	2.74E-08	5.50E-07	9.866130968
ELK1	-2.419444856	6.826152084	-9.948530702	3.74E-06	1.27E-05	4.78707853
ELL	-2.198752421	5.533625682	-14.85756712	1.23E-07	1.15E-06	8.353335881
ELL2	-4.336380851	5.796395917	-9.847644061	4.07E-06	1.36E-05	4.697239305
ELL3	-3.42578822	6.096341583	-8.502645195	1.36E-05	3.69E-05	3.415220124
ELMO3	-2.279771274	5.795689578	-5.497503778	0.000381773	0.000658464	-0.153463487
ELMOD3	-2.139398525	6.884037593	-8.738296631	1.09E-05	3.05E-05	3.65184754
ELOF1	-2.51696034	9.226220287	-15.20195173	1.01E-07	1.04E-06	8.556328801
EMB	-3.157032299	5.913458634	-4.7280878	0.00107757	0.001681381	-1.258585719
EMCN	-2.273578109	3.926807115	-20.68538063	6.77E-09	3.75E-07	11.23039817
EMID1	-2.48150632	6.155915378	-10.47362438	2.44E-06	9.02E-06	5.241716175
EML2	-2.16296584	6.166460719	-14.16057727	1.86E-07	1.48E-06	7.926697202
EML3	-2.226537463	6.629135419	-13.54491424	2.73E-07	1.87E-06	7.531081829
EMP1	-2.809310405	4.268984909	-10.48205179	2.42E-06	8.98E-06	5.2488408
EMP3	-4.091260364	7.576009578	-3.469360159	0.00705872	0.00940014	-3.235288299
EMR1	-2.145274319	5.276754176	-14.84444055	1.24E-07	1.15E-06	8.345499021
EMR3	-2.183238435	4.367259021	-12.83488044	4.34E-07	2.55E-06	7.051157
EMX1	-2.382671244	4.565475132	-11.60632882	1.02E-06	4.70E-06	6.154170801
EMX2	-3.429871248	4.112033026	-5.847448198	0.000244787	0.000442568	0.321439042
EMX2OS	-2.572424265	5.186560296	-14.38997956	1.62E-07	1.36E-06	8.069526749
EN2	-3.23636652	4.697924858	-9.285454377	6.62E-06	2.02E-05	4.181063296
ENDOD1	-2.689347849	7.150994336	-5.175114151	0.000583649	0.000966172	-0.606279954
ENKUR	-3.608358627	4.941597337	-4.197024626	0.002318241	0.003373081	-2.069401544
ENO1	-2.203031389	9.386606464	-8.350715629	1.57E-05	4.16E-05	3.259754998
ENPP1	-2.743972905	4.630429601	-8.178545935	1.86E-05	4.79E-05	3.080749138
ENPP3	-2.245432587	4.584040713	-6.644768911	9.44E-05	0.000191296	1.340983398
ENPP4	-3.826233801	5.039618966	-3.650323724	0.005317228	0.007238833	-2.940428514
ENPP5	-3.792549758	4.080717845	-5.211015425	0.000556297	0.000924782	-0.555122862
ENPP7	-2.292772409	6.313384403	-8.362433122	1.55E-05	4.12E-05	3.271827743
ENTHD2	-2.263672059	6.398875712	-13.41643368	2.97E-07	1.96E-06	7.446174688
ENTPD1	-2.146938561	4.370573489	-18.40309052	1.90E-08	4.74E-07	10.23044008
ENTPD3	-2.59510638	4.328073259	-10.25881256	2.90E-06	1.03E-05	5.058304038
ENTPD5	-2.136164867	5.790065511	-16.04989465	6.28E-08	8.02E-07	9.035609426
ENTPD7	-2.519154874	7.110834881	-10.03966501	3.47E-06	1.20E-05	4.867529367
EOMES	-2.665421833	4.720844782	-13.26466985	3.27E-07	2.09E-06	7.344798393
EPB41L1	-2.233991621	5.1168959	-8.638881202	1.19E-05	3.31E-05	3.552679549
EPB41L2	-2.9893058	6.003867908	-3.876042673	0.003755888	0.005249109	-2.576836938
EPB41L4A	-2.436200154	4.752389617	-6.999719845	6.34E-05	0.00013549	1.768285772
EPB41L4B	-2.517250684	5.366484818	-8.653593452	1.18E-05	3.27E-05	3.567415388
EPB42	-2.904167614	4.811801057	-15.14636138	1.04E-07	1.06E-06	8.523898641
EPCAM	-4.863762795	5.046901781	-3.98922389	0.003163122	0.00447726	-2.39653973
EPHA10	-2.181481189	5.352053913	-11.51675697	1.09E-06	4.93E-06	6.08517576
EPHA2	-5.045766226	7.069292025	-7.963231402	2.30E-05	5.73E-05	2.852543089
EPHA4	-3.615009328	5.166292582	-11.37072173	1.22E-06	5.31E-06	5.971571461
EPHA5	-2.211366383	4.321988051	-6.610298695	9.82E-05	0.000198129	1.298639814
EPHA5-AS1	-2.212330269	6.128464173	-10.54634147	2.30E-06	8.63E-06	5.303018102
EPHA8	-2.423772609	5.763116851	-14.59209107	1.44E-07	1.26E-06	8.193386371
EPHB1	-2.412577971	4.776863601	-20.3311766	7.88E-09	3.84E-07	11.08416
EPHB2	-2.551420039	6.851877434	-5.762090631	0.000272397	0.00048719	0.207181711
EPHB4	-2.79508516	7.080751013	-11.14084721	1.45E-06	6.06E-06	5.789882504
EPHX1	-5.06648728	7.468842663	-7.123464328	5.53E-05	0.000120705	1.913594622
EPHX3	-2.608127458	5.478475097	-9.081203877	7.95E-06	2.35E-05	3.986723026
EPHX4	-2.957789238	4.598343104	-8.43116214	1.45E-05	3.90E-05	3.342361645
EPN1	-2.131532165	7.033166083	-5.698484221	0.000295166	0.000523021	0.121379939
EPN3	-3.213342141	4.795780227	-5.960416079	0.000212819	0.000390604	0.471104232
EPPK1	-2.814698739	5.490307309	-6.950727901	6.69E-05	0.000141939	1.710240279
EPS8L1	-2.572704757	6.281273349	-8.308799956	1.64E-05	4.31E-05	3.216454476
EPS8L2	-2.712454185	5.294697505	-8.725271547	1.10E-05	3.09E-05	3.63890905
EPS8L3	-2.967761241	5.586715178	-16.03470571	6.33E-08	8.06E-07	9.027270274
EPSTI1	-2.439204367	4.272619385	-17.98741569	2.32E-08	5.05E-07	10.03252503
EPX	-2.564814935	5.242640188	-9.780235407	4.31E-06	1.43E-05	4.6367501
ERAL1	-2.132827568	8.288832076	-6.206785038	0.000157755	0.000301073	0.791453261
ERAP1	-2.241163879	4.890802564	-6.416169357	0.000123061	0.000242088	1.057302741
ERBB2	-3.229648727	5.033485411	-18.517797	1.79E-08	4.65E-07	10.28414034
ERBB3	-2.968282833	5.262370774	-8.007103307	2.20E-05	5.52E-05	2.899439693
ERBB4	-2.367977892	4.885468886	-11.5433397	1.07E-06	4.86E-06	6.105705739
ERCC2	-2.340908945	7.283745586	-7.006522971	6.29E-05	0.000134605	1.776322834
ERCC4	-2.26577003	6.663566039	-8.419486733	1.47E-05	3.94E-05	3.330413114
ERCC6	-2.724265946	6.420047334	-8.592021947	1.25E-05	3.44E-05	3.505604772
EREG	-2.345816202	4.216897491	-12.5020635	5.44E-07	2.99E-06	6.816864216
ERGIC3	-2.202833948	6.391151367	-11.76583264	9.13E-07	4.32E-06	6.275765534
ERICH1-AS1	-2.679993543	5.428568822	-16.50387003	4.92E-08	7.08E-07	9.280899344
ERICH5	-3.917487803	4.245149628	-5.771134453	0.000269317	0.000482272	0.219335517
ERICH6	-2.608460917	5.066612832	-21.5606445	4.69E-09	3.68E-07	11.57891216
ERLIN1	-2.753212435	8.542636441	-6.454876672	0.00011761	0.000232413	1.105814199
ERLIN2	-2.16004843	6.906117663	-7.499172978	3.70E-05	8.55E-05	2.343608535
ERN1	-2.23709702	5.941451552	-6.58707043	0.000100888	0.000202816	1.270019967
ERO1LB	-2.528139735	5.065366992	-5.58453189	0.00034129	0.000595621	-0.03375322
ERP27	-3.127336437	4.771496271	-23.36345253	2.30E-09	3.61E-07	12.24372794
ERRFI1	-3.162900409	7.965797892	-7.43218652	3.97E-05	9.07E-05	2.26814681
ERVFH21-1	-2.915626428	4.276811065	-16.78476295	4.25E-08	6.58E-07	9.428935497
ERVFRD-1	-3.120093253	4.574390965	-26.05843638	8.74E-10	3.61E-07	13.12188416
ERVH-1	-2.86274569	8.317407795	-9.923688992	3.82E-06	1.29E-05	4.765033479
ERVH-3	-2.467582397	5.012166895	-15.06047235	1.09E-07	1.09E-06	8.473539889
ERVH-4	-2.117389365	4.451801876	-11.48388701	1.12E-06	5.01E-06	6.059726838
ERVH48-1	-2.557821221	4.947475532	-14.18879545	1.83E-07	1.46E-06	7.944397078
ERVH-6	-2.737935439	5.942355851	-12.53951443	5.30E-07	2.93E-06	6.843538661
ERVV-1	-2.454412806	4.341741743	-12.60578755	5.07E-07	2.85E-06	6.890547119
ERVW-1	-2.435862341	4.187378413	-18.27734619	2.01E-08	4.80E-07	10.17112193
ESPNL	-2.14521956	6.549282028	-11.68619327	9.67E-07	4.50E-06	6.215255318
ESRP1	-3.801466471	4.91394106	-4.986171105	0.00075366	0.001217268	-0.87853516
ESX1	-3.853623042	4.457548505	-19.17930733	1.32E-08	4.30E-07	10.586391
ESYT2	-2.871401941	6.884562502	-6.652217341	9.36E-05	0.000189822	1.350113147
ETHE1	-2.833880317	8.364522007	-8.060059528	2.09E-05	5.28E-05	2.955774081
ETNK2	-2.560430403	6.370813388	-7.200787788	5.09E-05	0.00011204	2.00345528
EVA1A	-3.823613548	6.083315295	-4.102377883	0.002668712	0.003838525	-2.21775712
EVA1C	-4.010093668	4.695966844	-5.514738789	0.000373361	0.000645641	-0.12967117
EVI2A	-2.721142823	4.035443763	-5.75866242	0.000273574	0.00048921	0.20257163
EVPL	-2.283485917	6.002129312	-8.314181038	1.63E-05	4.29E-05	3.222023341
EXOC3L1	-2.308667717	6.261501638	-11.51275357	1.10E-06	4.94E-06	6.082079955
EXOC3L2	-2.546692943	7.464639627	-8.813627955	1.01E-05	2.88E-05	3.726360283
EXOC6B	-2.590167367	5.930450924	-8.166718119	1.88E-05	4.83E-05	3.068339527
EXOSC10	-2.108785586	6.921551101	-10.3767049	2.63E-06	9.58E-06	5.159396584
EXPH5	-3.467158552	5.120847718	-7.21263788	5.02E-05	0.000110853	2.017163614
EYA1	2.121754166	8.846883902	4.205266558	0.00229013	0.003336213	-2.056535147
EZR	-3.11022806	8.767865953	-4.927052191	0.000817284	0.00130969	-0.964763331
F11R	-4.293922059	5.853731326	-7.274525632	4.70E-05	0.000104874	2.088485334
F2	-2.246045159	5.79987528	-10.46973535	2.44E-06	9.05E-06	5.238426556
F2R	-2.614822345	6.786671601	-3.618946505	0.005583363	0.007564401	-2.991357819
F2RL1	-4.654225467	5.40733942	-9.622476241	4.93E-06	1.59E-05	4.493715448
F2RL2	-2.538704638	3.837750954	-4.286330648	0.002032226	0.00299285	-1.930444744
F2RL3	-2.211572169	3.835814809	-21.17199825	5.51E-09	3.69E-07	11.42636525
F5	-2.101103904	4.511508022	-19.76886057	1.01E-08	4.04E-07	10.84551934
F8	-2.777500583	5.352632962	-8.211984053	1.80E-05	4.66E-05	3.115753502
FA2H	-3.384238197	5.104323665	-6.31256848	0.000139056	0.000269682	0.926490962
FAAH	-2.782881662	5.571606985	-16.5324132	4.85E-08	7.05E-07	9.296070308
FAAH2	-2.922952946	5.844878678	-10.68489259	2.06E-06	7.92E-06	5.418740767
FABP2	-3.178680439	4.737151913	-10.4435157	2.50E-06	9.18E-06	5.216218597
FABP4	-2.10882687	4.25612715	-19.89837128	9.53E-09	4.01E-07	10.90120347
FAH	-2.117343282	6.187908759	-7.272319832	4.71E-05	0.000105088	2.085951076
FAHD2A	-2.193949833	7.18307509	-9.461844008	5.67E-06	1.78E-05	4.345920921
FAIM3	-2.902942796	5.734885269	-9.289137654	6.60E-06	2.02E-05	4.184533658
FAM102A	-2.282078928	6.190208437	-6.572392442	0.00010261	0.000205994	1.251899224
FAM109B	-2.59491854	5.892964869	-11.81283008	8.82E-07	4.22E-06	6.311287605
FAM110D	-2.210257625	5.559760744	-9.098607582	7.82E-06	2.32E-05	4.003428865
FAM111A	-2.827124707	5.180281187	-5.488617656	0.000386191	0.000665298	-0.165746875
FAM114A1	-3.13567134	7.188066758	-3.948489987	0.003364156	0.004741476	-2.461263533
FAM122A	-2.231262584	6.48924895	-7.192668204	5.13E-05	0.000112882	1.994052789
FAM124B	-2.247632076	4.61036929	-10.42738124	2.53E-06	9.29E-06	5.202527151
FAM126A	-3.645942043	6.111465942	-10.91255055	1.73E-06	6.92E-06	5.605878007
FAM129A	-3.73318343	4.952943361	-6.188894138	0.000161179	0.000306865	0.768466644
FAM129B	-3.122939173	7.452830982	-7.900907161	2.45E-05	6.04E-05	2.785567117
FAM129C	-2.181203249	5.13926663	-19.41724922	1.18E-08	4.23E-07	10.69210473
FAM132A	-2.104394406	5.662918688	-8.016514664	2.18E-05	5.47E-05	2.909473167
FAM151A	-3.927084097	4.903321499	-19.99508903	9.13E-09	3.94E-07	10.94250369
FAM153A	-2.784209711	6.224344428	-15.11467305	1.06E-07	1.07E-06	8.505354912
FAM159A	-2.378532357	4.639272045	-12.67088456	4.85E-07	2.75E-06	6.936480978
FAM160A1	-2.176216366	5.915504171	-16.1420633	5.97E-08	7.80E-07	9.086026509
FAM163A	2.290680002	7.792691715	5.935812767	0.000219374	0.000401114	0.438658384
FAM166B	-3.296833554	5.491876501	-7.197766039	5.10E-05	0.000112358	1.999957009
FAM167B	-2.624347312	5.399854759	-14.00850364	2.05E-07	1.56E-06	7.830667833
FAM169B	-2.433670187	4.72838696	-20.07554947	8.81E-09	3.91E-07	10.97667817
FAM170A	-2.487279456	4.934798048	-14.25401685	1.76E-07	1.43E-06	7.985166118
FAM170B	-2.458370397	4.557820722	-11.05191803	1.55E-06	6.38E-06	5.718634855
FAM171A2	-2.657548003	5.69576238	-9.482450166	5.57E-06	1.76E-05	4.365003559
FAM178B	-2.705257904	5.974357693	-11.50596977	1.10E-06	4.96E-06	6.076831717
FAM179A	-3.48663266	5.304306125	-6.058601349	0.000188704	0.000351547	0.599761228
FAM181A	-2.172664822	5.874246843	-14.73135515	1.32E-07	1.20E-06	8.277676278
FAM181A-AS1	-2.56985959	4.502156105	-15.09627569	1.07E-07	1.07E-06	8.494569713
FAM186B	-2.83868973	5.761700025	-7.435022273	3.96E-05	9.05E-05	2.271351816
FAM187B	-2.703605137	4.70261162	-14.03267351	2.02E-07	1.55E-06	7.846003019
FAM189A1	-2.191284484	4.949423756	-10.48168762	2.42E-06	8.98E-06	5.248533036
FAM189A2	-2.469941271	5.944223691	-16.0758924	6.19E-08	7.95E-07	9.049862736
FAM199X	-2.311868015	7.559784751	-6.270722703	0.000146147	0.000281412	0.873251278
FAM201A	-3.015494881	4.129168373	-16.17203449	5.88E-08	7.73E-07	9.102352508
FAM20A	-2.178018937	4.180305088	-15.05526816	1.10E-07	1.09E-06	8.470478624
FAM20C	-2.112868321	5.745311918	-7.804514136	2.70E-05	6.57E-05	2.681151323
FAM214B	-2.685661555	7.122665834	-9.159550281	7.41E-06	2.21E-05	4.061711336
FAM217A	-2.154342475	4.351813725	-19.79938646	9.96E-09	4.04E-07	10.85868367
FAM228A	-2.224122014	4.007247234	-12.79392804	4.46E-07	2.60E-06	7.022659347
FAM229B	-2.587788051	8.484762083	-5.342519352	0.000467341	0.000791369	-0.369304969
FAM230B	-2.852837815	4.886782239	-18.84747625	1.54E-08	4.45E-07	10.43633686
FAM26D	-2.52668425	4.361021117	-10.54020637	2.31E-06	8.65E-06	5.297861244
FAM26E	-2.343448944	5.44867531	-7.235866362	4.90E-05	0.000108744	2.043986173
FAM26F	-2.315974462	4.29056846	-14.23791525	1.78E-07	1.43E-06	7.975119483
FAM3A	-2.247686876	7.377278528	-11.17462181	1.41E-06	5.96E-06	5.816800294
FAM3B	-3.156638164	4.463367046	-4.863545126	0.000892129	0.001418076	-1.057942727
FAM3D	-3.230364378	6.819806636	-6.236051932	0.000152321	0.00029182	0.828963439
FAM43B	-2.514310348	5.571497144	-10.26907177	2.87E-06	1.03E-05	5.067143533
FAM46C	-3.772090638	4.979010118	-8.537146825	1.31E-05	3.59E-05	3.450204084
FAM47A	-2.113671961	3.775196248	-14.92009268	1.19E-07	1.13E-06	8.390563619
FAM47C	-2.496145387	4.231138271	-16.68762636	4.47E-08	6.77E-07	9.37805845
FAM49A	-2.27805859	4.462464728	-9.052844978	8.15E-06	2.40E-05	3.95944213
FAM65A	-2.500452141	7.276294816	-8.569551868	1.27E-05	3.50E-05	3.482955237
FAM65B	-2.770922315	4.638708049	-5.264498069	0.000518086	0.000868316	-0.479253772
FAM69C	-2.717561239	6.233225144	-9.576425337	5.13E-06	1.64E-05	4.45156943
FAM71B	-2.302877193	4.813385414	-18.25948147	2.03E-08	4.80E-07	10.16265596
FAM71C	-2.426409835	4.89903969	-15.32237752	9.40E-08	1.00E-06	8.626145359
FAM71D	-3.542361425	4.560059968	-26.67602284	7.10E-10	3.61E-07	13.30597908
FAM71E1	-3.422976411	5.450968288	-19.87202331	9.64E-09	4.03E-07	10.88991041
FAM71F1	-2.10178453	4.357326444	-18.90564029	1.50E-08	4.44E-07	10.46286332
FAM81A	-2.797828659	5.405604174	-15.2133491	1.00E-07	1.04E-06	8.562961963
FAM83A	-2.720901663	6.268671765	-5.55977815	0.00035231	0.000612917	-0.067694088
FAM83B	-2.923566429	4.224302992	-11.06100212	1.54E-06	6.35E-06	5.725937676
FAM83C	-2.41829668	4.937448904	-23.34298736	2.32E-09	3.61E-07	12.23655369
FAM83E	-2.642902327	5.706367837	-6.806075017	7.86E-05	0.000163387	1.5371248
FAM83F	-2.723579457	5.424079623	-10.61377651	2.18E-06	8.25E-06	5.359517742
FAM83G	-2.252943998	6.556393262	-8.644608374	1.19E-05	3.30E-05	3.558418401
FAM83H	-3.499444146	4.997503283	-12.38538048	5.89E-07	3.17E-06	6.733242779
FAM84B	-3.517828527	6.706338907	-6.291117826	0.000142643	0.000275705	0.899228753
FAM86A	-2.257316439	7.916693314	-12.01209718	7.65E-07	3.80E-06	6.460381981
FAM86C1	-2.54338498	6.443218964	-9.891324397	3.93E-06	1.32E-05	4.73623773
FAM90A1	-2.644477502	5.193039256	-22.95702247	2.69E-09	3.61E-07	12.09970699
FAM98C	-2.425701243	7.09151481	-7.012753051	6.24E-05	0.000133808	1.78367795
FANCD2OS	-2.901322117	5.713752139	-18.13453979	2.16E-08	4.89E-07	10.10317659
FANK1	-3.645950172	5.63091586	-4.204884005	0.002291427	0.003337865	-2.057132159
FAP	-3.100352328	5.277122564	-4.063540883	0.002828455	0.004043151	-2.278948515
FAS	-4.67467867	5.820942609	-15.0373121	1.11E-07	1.09E-06	8.459907579
FASLG	-2.188682794	4.430814877	-11.37664142	1.21E-06	5.30E-06	5.97620373
FAT2	-2.792029896	5.164956063	-7.710525965	2.97E-05	7.12E-05	2.57836019
FATE1	-2.619966012	5.219226267	-17.65009642	2.73E-08	5.50E-07	9.867989943
FBF1	-2.48255439	6.526708643	-12.33138235	6.12E-07	3.25E-06	6.694279063
FBLIM1	-3.392865577	6.579423585	-7.076223899	5.82E-05	0.000126063	1.858340971
FBLN5	-4.106573323	5.568411724	-12.15943429	6.90E-07	3.53E-06	6.569069081
FBN2	-2.725212233	4.73778816	-5.029723542	0.000710209	0.001153646	-0.815328651
FBN3	-2.727819439	5.287991551	-11.96668151	7.90E-07	3.88E-06	6.426615559
FBP2	-2.718366654	5.017022953	-20.18771701	8.39E-09	3.86E-07	11.02404394
FBRS	-2.546652964	6.819071331	-8.304187537	1.64E-05	4.32E-05	3.21167875
FBXL19-AS1	-2.238136356	4.961728734	-10.97486923	1.64E-06	6.66E-06	5.65646481
FBXL2	-2.248696176	7.320412064	-4.380850674	0.001770057	0.002636016	-1.784493104
FBXL8	-2.858387128	5.091344153	-12.99708124	3.90E-07	2.36E-06	7.163132734
FBXO15	-3.478409186	5.646029671	-4.011311348	0.003059475	0.004342872	-2.361523561
FBXO2	-2.125481672	5.186417201	-10.86364258	1.79E-06	7.12E-06	5.565986242
FBXO27	-3.026807663	5.397628871	-13.39420047	3.01E-07	1.98E-06	7.431396922
FBXO31	-2.126237771	7.09885131	-11.10139977	1.49E-06	6.20E-06	5.758345155
FBXO32	-3.480945622	4.920720559	-6.236849495	0.000152176	0.000291624	0.829984037
FBXO39	-2.93223323	4.230883286	-17.8317843	2.50E-08	5.25E-07	9.957057622
FBXO40	-2.165068513	4.900443205	-11.93011652	8.11E-07	3.96E-06	6.399338168
FBXW4	-2.126871202	8.045565401	-7.081419048	5.79E-05	0.000125448	1.864430551
FBXW5	-2.243910776	7.947251988	-11.74595147	9.26E-07	4.36E-06	6.260697143
FBXW9	-2.753823737	7.610279424	-7.11327737	5.59E-05	0.000121768	1.901702462
FCGBP	-2.43453476	5.841845884	-13.23848049	3.33E-07	2.12E-06	7.327184162
FCGR1B	-2.270585328	4.646198142	-17.98979029	2.31E-08	5.05E-07	10.03367066
FCGR2C	-2.293727934	5.513679146	-17.37487748	3.14E-08	5.81E-07	9.73105071
FCGR3B	-2.693976065	4.561735156	-21.78111412	4.29E-09	3.63E-07	11.66393017
FCGRT	-3.055823883	7.042823928	-9.421035137	5.88E-06	1.84E-05	4.308021104
FCHSD1	-2.687174718	5.386122433	-12.24512318	6.50E-07	3.39E-06	6.631683964
FCN3	-2.457089245	4.707171468	-19.89864219	9.53E-09	4.01E-07	10.90131949
FCRL2	-2.109775794	4.976549281	-16.53644992	4.84E-08	7.05E-07	9.298213505
FCRLB	-2.681649435	5.424967093	-14.95580575	1.16E-07	1.12E-06	8.411752284
FDX1	-2.148821851	8.030084403	-7.066124837	5.89E-05	0.000127223	1.84649383
FDXACB1	-2.50791364	5.836363734	-8.616554972	1.22E-05	3.38E-05	3.530277332
FDXR	-3.067862727	7.22229546	-7.781119867	2.76E-05	6.70E-05	2.655656934
FER1L4	-2.24896774	5.194189463	-14.55863341	1.47E-07	1.27E-06	8.173008622
FERD3L	-3.471982221	5.353443187	-16.77544524	4.27E-08	6.59E-07	9.424069523
FERMT1	-2.760727204	5.627837129	-6.041060348	0.000192784	0.000358179	0.576872983
FEZ1	-2.306711464	6.100326044	-3.459679043	0.007167301	0.009532329	-3.251134827
FFAR4	-2.433163023	3.731178219	-19.94170798	9.35E-09	3.99E-07	10.91973893
FGA	-2.350416582	4.596207294	-17.71683009	2.65E-08	5.44E-07	9.90082624
FGD2	-2.219279612	6.007533283	-15.06840019	1.09E-07	1.08E-06	8.4782011
FGD3	-2.166452751	5.377228755	-17.3499422	3.18E-08	5.83E-07	9.71852162
FGF1	-2.607588374	5.017940613	-7.396094351	4.13E-05	9.38E-05	2.227273736
FGF10	-2.410559743	4.134391075	-15.80915372	7.16E-08	8.65E-07	8.902402575
FGF10-AS1	-2.650776206	4.506409499	-20.96080281	6.02E-09	3.69E-07	11.34200386
FGF13-AS1	-2.613152121	4.170527758	-14.77656807	1.29E-07	1.18E-06	8.304859105
FGF16	-2.313223618	5.230836913	-8.782563711	1.04E-05	2.95E-05	3.695699062
FGF19	-2.369355839	5.144846248	-13.98645663	2.07E-07	1.58E-06	7.816655423
FGF22	-2.610167197	5.663470397	-15.07796757	1.08E-07	1.08E-06	8.483822777
FGF23	-2.512308804	5.34196794	-21.40753971	5.00E-09	3.68E-07	11.51922918
FGF4	-2.520956226	5.406733056	-15.46769807	8.66E-08	9.53E-07	8.70960751
FGF5	-3.031922341	5.314909226	-4.413020141	0.00168927	0.002524528	-1.735086341
FGF6	-2.135073883	6.537964271	-15.28895193	9.59E-08	1.01E-06	8.606826611
FGFBP1	-4.486856038	6.128560787	-4.698881739	0.001122746	0.001746124	-1.302182772
FGFR2	-2.192757909	5.506419045	-5.702614217	0.000293626	0.000520518	0.126968255
FGFR3	-2.855115768	5.688493783	-4.862588439	0.000893311	0.001419625	-1.059350759
FGFRL1	-2.708939598	6.108753375	-6.936605927	6.79E-05	0.000143913	1.69345383
FGR	-2.746052865	5.304683141	-14.0931902	1.94E-07	1.52E-06	7.884278472
FHAD1	-2.547404665	5.167464582	-12.78824921	4.48E-07	2.61E-06	7.018700351
FHDC1	-2.95664069	6.302900527	-10.62136668	2.17E-06	8.22E-06	5.365856165
FHIT	-2.834140464	5.7159466	-5.627283412	0.000323129	0.000566972	0.024661924
FHL2	-3.540693476	9.206587199	-5.157824923	0.000597336	0.000986192	-0.630981514
FHOD1	-2.379727012	7.63844292	-4.887348334	0.000863246	0.001376336	-1.022951241
FIBIN	-2.434616394	4.526322238	-20.20234924	8.34E-09	3.85E-07	11.03019926
FICD	-2.627258486	6.189874188	-8.102459374	2.00E-05	5.10E-05	3.000664983
FILIP1L	-2.129529079	5.06146177	-3.443705142	0.007350296	0.009757313	-3.277296228
FIRRE	-3.245928705	4.922591926	-14.84359857	1.24E-07	1.15E-06	8.344996086
FITM2	-2.116434127	6.838925746	-9.053487341	8.15E-06	2.40E-05	3.960060887
FKBP6	-3.125285721	5.979934174	-11.14887656	1.44E-06	6.04E-06	5.796288792
FKBP8	-2.417063602	6.625260488	-6.766973259	8.22E-05	0.00016974	1.489880745
FKSG29	-3.714429614	5.183264002	-24.57019684	1.47E-09	3.61E-07	12.65278387
FLI1	-2.791392232	4.384739611	-10.78210224	1.91E-06	7.49E-06	5.499101072
FLII	-3.148996773	8.200204523	-12.54149945	5.30E-07	2.93E-06	6.844950268
FLJ12120	-2.722375129	3.940627951	-24.863644	1.33E-09	3.61E-07	12.74825717
FLJ13744	-2.855442617	4.726234443	-14.67876268	1.37E-07	1.22E-06	8.245944615
FLJ16734	-2.733665672	4.151559538	-21.52958007	4.75E-09	3.68E-07	11.56684557
FLJ16779	-2.115986876	4.359472856	-14.93244298	1.18E-07	1.13E-06	8.397897231
FLJ26850	-2.602950062	4.302296514	-8.299559272	1.65E-05	4.34E-05	3.206884434
FLJ30064	-2.173889177	6.060879848	-8.744361187	1.08E-05	3.04E-05	3.657866233
FLJ31104	-2.216750709	4.978295492	-21.80636173	4.25E-09	3.61E-07	11.67359731
FLJ31715	-2.993902528	5.30825318	-24.61496256	1.45E-09	3.61E-07	12.66744637
FLJ31945	-2.344045143	4.702835046	-14.4582869	1.56E-07	1.32E-06	8.111592361
FLJ32790	-2.404744346	4.15132335	-11.66552858	9.82E-07	4.54E-06	6.199488774
FLJ33360	-2.558748327	4.241094407	-17.11986066	3.57E-08	6.09E-07	9.601939113
FLJ33534	-2.31690757	4.885778664	-10.8707121	1.78E-06	7.09E-06	5.571762928
FLJ33544	-2.459063424	5.07250773	-11.88251538	8.39E-07	4.06E-06	6.36370495
FLJ35700	-2.581707485	4.292488017	-16.57614984	4.74E-08	6.96E-07	9.319260098
FLJ36840	-2.199513626	4.635463119	-10.69635885	2.04E-06	7.88E-06	5.428255052
FLJ36848	-3.062423539	5.28450859	-9.767462356	4.36E-06	1.44E-05	4.625246123
FLJ39080	-2.604725815	5.214051313	-20.01647184	9.05E-09	3.94E-07	10.95160196
FLJ40288	-2.336855601	6.123579038	-18.92861766	1.48E-08	4.42E-07	10.47331592
FLJ45513	-2.340672312	5.31020003	-12.38849085	5.88E-07	3.17E-06	6.735481999
FLJ46875	-3.082234116	5.361662219	-9.570786275	5.16E-06	1.65E-05	4.446396196
FLJ90680	-2.216591891	5.133822151	-11.3009341	1.28E-06	5.53E-06	5.916786377
FLNB	-2.594742581	8.511166709	-5.10134736	0.000644514	0.001056072	-0.711969025
FLOT1	-2.335533596	8.488614633	-6.54173056	0.000106311	0.000212466	1.213955832
FLOT2	-2.257350598	7.599214222	-6.087387954	0.000182209	0.000340907	0.637232497
FLT3	-2.551140995	5.157506719	-15.88342361	6.88E-08	8.44E-07	8.943734165
FLT3LG	-2.470111383	5.009636503	-17.19772137	3.43E-08	6.00E-07	9.641589262
FLYWCH1	-2.281872624	6.865779751	-11.11339003	1.48E-06	6.16E-06	5.767942347
FMO1	-2.551729007	4.781538605	-7.148251112	5.38E-05	0.000117832	1.942478344
FMO2	-2.521111436	5.208512691	-6.794103079	7.97E-05	0.000165421	1.522680307
FMO3	-2.190096238	3.861578194	-4.384395443	0.001760956	0.0026238	-1.779042244
FMO4	-3.975573784	5.491252776	-12.21724602	6.62E-07	3.43E-06	6.611361135
FMO5	-3.600860663	4.617381082	-15.27976667	9.64E-08	1.02E-06	8.601509867
FMOD	-2.448787095	6.276810025	-10.34764524	2.70E-06	9.78E-06	5.134576338
FN1	-2.883132911	7.381160116	-3.606636002	0.005691569	0.007700801	-3.011363058
FNDC1	-2.530360557	4.152036407	-7.662803539	3.12E-05	7.42E-05	2.525793365
FNDC7	-2.115408459	5.365799673	-9.732323021	4.49E-06	1.47E-05	4.593528536
FNDC8	-2.343984475	4.94071293	-10.09407694	3.32E-06	1.15E-05	4.915247831
FNDC9	-3.590598765	4.368792291	-18.53772256	1.78E-08	4.64E-07	10.29342893
FOLH1	-3.327993914	4.573399508	-17.73494905	2.62E-08	5.41E-07	9.909717168
FOLH1B	-2.403363148	4.2256927	-17.15138995	3.52E-08	6.06E-07	9.618019805
FOLR1	-3.486749092	5.769799761	-6.880808147	7.23E-05	0.000151963	1.626887357
FOLR3	-2.31448952	5.327705336	-7.413130499	4.05E-05	9.23E-05	2.246585343
FOS	-3.190344307	5.758085318	-5.548139691	0.000357623	0.000621316	-0.083681922
FOSB	-2.52249914	5.219398592	-13.49279048	2.83E-07	1.90E-06	7.49673588
FOSL1	-3.946896605	6.299350206	-5.955695483	0.00021406	0.000392389	0.464885349
FOSL2	-2.848996811	6.333081655	-4.063064744	0.002830475	0.004045316	-2.279699837
FOXA1	-3.301609318	4.400859424	-6.215961732	0.000156029	0.000298308	0.803227008
FOXA2	-2.373788122	4.749783862	-12.8190033	4.39E-07	2.57E-06	7.040119432
FOXA3	-3.019964086	5.338074689	-23.6026281	2.11E-09	3.61E-07	12.32697219
FOXC2	-3.387783384	5.088673175	-7.368603652	4.25E-05	9.63E-05	2.196040154
FOXD2	-2.332734807	4.396715437	-12.07743317	7.31E-07	3.68E-06	6.50873981
FOXD2-AS1	-2.876800232	4.719707724	-16.44315311	5.08E-08	7.21E-07	9.248530175
FOXD3-AS1	-2.785531524	5.063141784	-8.46177925	1.41E-05	3.80E-05	3.373630205
FOXE1	-2.632530826	4.431429237	-16.93766802	3.92E-08	6.35E-07	9.508355687
FOXF1	-2.256833093	4.398971335	-7.181648767	5.19E-05	0.000114028	1.981279685
FOXF2	-4.326071613	5.343910672	-6.287386368	0.000143277	0.000276748	0.894480096
FOXH1	-2.590872241	5.276048077	-14.46076258	1.55E-07	1.32E-06	8.113113007
FOXJ1	-3.244848967	6.220428331	-4.01230446	0.003054901	0.004337582	-2.359950467
FOXL1	-2.101708148	5.311944189	-9.272178944	6.70E-06	2.04E-05	4.168545298
FOXL2	-2.639160086	4.109050102	-9.661984926	4.77E-06	1.55E-05	4.529731543
FOXN1	-2.626943392	4.719053902	-15.17299926	1.02E-07	1.05E-06	8.539454576
FOXN3-AS1	-2.800867144	5.893580673	-14.23788605	1.78E-07	1.43E-06	7.975101248
FOXO1	-2.439659959	5.284332245	-6.023580427	0.000196946	0.00036514	0.554022715
FOXP2	-2.408666665	4.33723598	-17.51104736	2.93E-08	5.66E-07	9.799111467
FOXP3	-2.296283321	5.565993697	-11.12236594	1.47E-06	6.13E-06	5.775120374
FOXP4	-2.239466765	6.328728765	-15.72039971	7.52E-08	8.83E-07	8.852730393
FOXQ1	-4.054111867	5.215931355	-5.544370458	0.000359363	0.000623755	-0.088863841
FOXR1	-2.28612836	4.002703337	-9.190894086	7.20E-06	2.16E-05	4.091556472
FOXRED2	-2.143012	7.059319883	-4.173871117	0.002399193	0.003480677	-2.105591678
FPGS	-2.914265759	8.112780482	-13.94219812	2.13E-07	1.60E-06	7.788456308
FPGT	-2.199068836	6.984415519	-4.056544677	0.002858296	0.004081655	-2.289990869
FPR1	-2.274601028	4.9887799	-15.54303497	8.30E-08	9.34E-07	8.752541247
FPR3	-2.466663463	4.711634729	-18.17670625	2.11E-08	4.81E-07	10.12330328
FRAT1	-2.557799237	5.821390073	-7.598021113	3.34E-05	7.84E-05	2.454026991
FRAT2	-2.769364384	7.513345784	-6.234333653	0.000152635	0.000292311	0.82676436
FREM2	-3.109392056	3.861357564	-6.377522992	0.00012878	0.000251981	1.008671467
FRK	-3.197040387	4.204561486	-4.199701954	0.002309069	0.003361649	-2.06522106
FRMD1	-2.371279747	6.98654178	-13.43448373	2.93E-07	1.95E-06	7.458153549
FRMD4B	-2.264973275	4.451073234	-4.845007844	0.000915342	0.001451028	-1.085248459
FRMD8	-2.846787108	6.793230531	-10.93037336	1.70E-06	6.84E-06	5.620373327
FRMPD3	-2.951129394	5.423259697	-14.84846944	1.24E-07	1.15E-06	8.347905146
FSCN2	-2.27442386	4.172470035	-7.770278203	2.80E-05	6.77E-05	2.643821612
FSCN3	-3.945001056	5.949425407	-16.20716496	5.77E-08	7.67E-07	9.121446315
FSD2	-3.249457879	5.061099985	-16.54739558	4.81E-08	7.02E-07	9.304021888
FST	-4.774682867	5.832632925	-7.221986783	4.97E-05	0.000110037	2.027966752
FSTL3	-3.364656982	6.709646276	-6.727005257	8.60E-05	0.000176445	1.441390982
FUCA1	-3.555549402	5.58491406	-6.917962516	6.94E-05	0.000146609	1.671255184
FUK	-2.54962981	6.8333113	-12.5681473	5.20E-07	2.90E-06	6.863878784
FURIN	-2.464141708	7.246981912	-6.237099083	0.000152131	0.000291564	0.830303403
FUT1	-2.649374455	5.487912263	-12.45220224	5.63E-07	3.07E-06	6.78122647
FUT10	-2.168990011	5.789942442	-10.81283009	1.86E-06	7.34E-06	5.524361804
FUT2	-2.983849593	6.115532903	-7.232639117	4.91E-05	0.000108981	2.040263417
FUT3	-2.978331185	5.599816802	-4.449820663	0.00160166	0.002408021	-1.678735596
FUT6	-2.657599818	5.712272616	-7.439813235	3.94E-05	9.01E-05	2.276764517
FXYD1	-2.280307027	5.873938277	-11.31077867	1.28E-06	5.50E-06	5.924534213
FXYD3	-3.893723278	6.749816783	-4.723394422	0.001084696	0.001691062	-1.265583702
FXYD4	-2.64857036	5.015303611	-14.10259404	1.93E-07	1.51E-06	7.890210735
FXYD5	-4.868001634	6.897288522	-11.57009761	1.05E-06	4.79E-06	6.126324953
FXYD6	2.659180774	9.023868945	4.459438952	0.001579571	0.002378308	-1.664037413
FXYD7	-2.524999542	5.051878729	-13.98752268	2.07E-07	1.58E-06	7.817333507
FYB	-2.527958191	4.316327528	-11.54805328	1.07E-06	4.85E-06	6.109341292
FYCO1	-3.466466415	6.691988876	-10.21482554	3.00E-06	1.07E-05	5.020312161
FZD10	-2.38352867	4.004399126	-20.1248539	8.62E-09	3.91E-07	10.99753772
FZD10-AS1	-2.748730554	5.019622475	-21.42016972	4.97E-09	3.68E-07	11.52417271
FZD4	-2.253964417	6.026999171	-7.255814954	4.79E-05	0.000106782	2.066970281
FZD5	-2.125901415	5.884187084	-5.151950388	0.000602065	0.000993118	-0.6393843
G0S2	-4.556882533	5.89580727	-8.081849687	2.04E-05	5.18E-05	2.978868097
G6PC2	-2.900887457	5.37197073	-14.7424758	1.31E-07	1.20E-06	8.284370457
G6PD	-3.543409586	7.932813174	-10.65086411	2.12E-06	8.09E-06	5.390449005
GAA	-2.238628927	7.97293764	-5.977316108	0.00020844	0.000383841	0.49334315
GAB3	-2.607465202	5.04306883	-13.00859919	3.87E-07	2.35E-06	7.171030297
GAB4	-2.527531024	6.054269671	-12.66397092	4.87E-07	2.76E-06	6.931613814
GABARAPL1	-2.320241969	6.556770673	-4.27062655	0.002079659	0.003055054	-1.954806126
GABARAPL3	-3.191015643	4.432695951	-18.2191959	2.07E-08	4.81E-07	10.14352949
GABBR2	-2.103706934	5.019143809	-11.18878622	1.40E-06	5.91E-06	5.828066055
GABRA4	-2.202459298	4.594698494	-18.71358417	1.64E-08	4.57E-07	10.37490546
GABRD	-2.405060869	5.360156517	-20.60816952	7.00E-09	3.75E-07	11.19878287
GABRP	-3.892836266	5.024025688	-3.441027684	0.007381444	0.009792942	-3.281683002
GABRR2	-2.44196529	6.12314158	-8.861981493	9.70E-06	2.78E-05	3.773904765
GAD1	-2.212596721	5.380922821	-3.95475816	0.003332359	0.004698603	-2.451291507
GADD45B	-3.23469535	6.000486633	-10.1103655	3.27E-06	1.14E-05	4.929487228
GAFA1	-2.61331692	4.058571884	-20.85894646	6.29E-09	3.70E-07	11.30094145
GAFA2	-2.159091055	6.578655417	-10.88525935	1.76E-06	7.03E-06	5.583638755
GALE	-2.380661149	7.129173537	-13.24059115	3.33E-07	2.11E-06	7.328605048
GALNS	-2.476782996	6.298718294	-12.64098819	4.95E-07	2.79E-06	6.915414905
GALNT1	-2.353771614	9.369435418	-4.242283023	0.002168282	0.003172941	-1.998854606
GALNT10	-3.238071242	6.106993045	-5.970403502	0.000210219	0.000386534	0.484251517
GALNT12	-4.258637319	5.544504987	-5.904593575	0.000228009	0.000415353	0.397367901
GALNT15	-2.771973276	4.25450809	-26.42694815	7.72E-10	3.61E-07	13.23244623
GALNT18	-2.738620356	5.380975675	-12.74003703	4.63E-07	2.66E-06	6.985017705
GALNT3	-2.635476895	4.782658409	-4.78457818	0.000995636	0.001565696	-1.174597953
GALNT5	-2.383609733	4.563518833	-15.6188255	7.96E-08	9.16E-07	8.795505421
GALR2	-2.12402234	4.470024654	-14.28972582	1.72E-07	1.41E-06	8.007404275
GALR3	-2.745136983	7.022031824	-15.51420873	8.44E-08	9.40E-07	8.736140261
GANAB	-2.340139725	9.859951306	-9.258079929	6.78E-06	2.06E-05	4.155233605
GAS2L2	-2.79352067	6.552956659	-10.67920732	2.07E-06	7.95E-06	5.414019805
GAS7	-2.683093939	5.374871625	-12.17930303	6.80E-07	3.49E-06	6.583626374
GAS8	-2.238317484	7.838955077	-11.19748452	1.39E-06	5.88E-06	5.834977576
GATA1	-2.398032646	5.917224428	-12.34326357	6.07E-07	3.23E-06	6.702866786
GATA3	3.034655646	9.207151926	5.901668919	0.000228837	0.000416713	0.393492874
GATA6	-3.623695411	5.135436647	-22.07467944	3.81E-09	3.61E-07	11.77547169
GATA6-AS1	-2.837437714	5.45829303	-12.44320981	5.66E-07	3.08E-06	6.77478409
GATSL3	-3.189600535	5.643335672	-19.13005131	1.35E-08	4.31E-07	10.5643125
GBE1	-2.634138749	8.779719515	-4.659107666	0.001187566	0.001836464	-1.361745657
GBF1	-2.843720233	7.781033235	-5.65144086	0.000313332	0.00055177	0.057556727
GBP1	-3.843794295	4.404295536	-6.784897057	8.05E-05	0.00016681	1.511560734
GBP3	-5.011142331	4.852231631	-4.472795318	0.001549437	0.002337236	-1.643647459
GBP6	-2.799422817	3.907189509	-7.167134482	5.27E-05	0.000115687	1.964433414
GBX1	-2.38077846	6.202442208	-7.605424733	3.31E-05	7.79E-05	2.462252651
GCGR	-2.615212079	5.910685126	-8.054115018	2.10E-05	5.30E-05	2.949465165
GCHFR	-2.842743136	6.743762746	-3.526203929	0.006454965	0.008660947	-3.142383462
GCNT1	-3.41810266	5.875083606	-20.96500818	6.01E-09	3.69E-07	11.34369393
GCNT2	-2.557039417	6.048814291	-5.353345228	0.000460735	0.000781218	-0.354117376
GCNT3	-3.625399296	6.241333351	-4.946048776	0.000796231	0.001279762	-0.937001784
GCNT4	-2.256894456	4.345783836	-17.76153096	2.59E-08	5.36E-07	9.922741975
GCSAM	-2.498370787	4.085261632	-21.40471052	5.00E-09	3.68E-07	11.51812131
GDA	-3.052543694	4.76303784	-7.204834426	5.06E-05	0.000111659	2.008138362
GDF10	-2.148999299	3.783652914	-15.73731839	7.45E-08	8.78E-07	8.862222771
GDF3	-2.504020433	5.828825633	-11.07403068	1.52E-06	6.30E-06	5.736401593
GDF5	-2.259060955	6.52563473	-10.27183231	2.87E-06	1.03E-05	5.06952068
GDF9	-2.256567814	5.358027749	-16.70592661	4.43E-08	6.72E-07	9.387668888
GDNF	-2.184786687	5.422303223	-5.123961718	0.000625158	0.001027565	-0.679486054
GDPD2	-2.887424088	6.439479513	-12.57454893	5.18E-07	2.89E-06	6.868420013
GDPGP1	-2.62110195	4.326546717	-12.50545611	5.43E-07	2.98E-06	6.819283891
GFAP	-2.633469677	4.85023714	-18.00014616	2.30E-08	5.05E-07	10.03866481
GFI1	-3.189299321	4.960041497	-9.931046364	3.80E-06	1.29E-05	4.771567747
GFI1B	-2.269389755	5.129351802	-11.33277748	1.25E-06	5.44E-06	5.94182434
GFOD1	-2.431072326	5.746075021	-10.54135764	2.31E-06	8.65E-06	5.298829154
GFOD2	-2.154221158	7.325093571	-13.71133869	2.46E-07	1.75E-06	7.639837765
GFPT2	-2.485815591	6.095932371	-7.899795073	2.45E-05	6.04E-05	2.784368223
GFRA3	-2.816667723	5.942253612	-9.425518883	5.85E-06	1.83E-05	4.312192274
GGACT	-2.446314612	4.991989562	-14.38895829	1.62E-07	1.36E-06	8.068896226
GGT1	-3.067027165	6.099468082	-14.87359102	1.22E-07	1.15E-06	8.362892475
GGT5	-2.604099711	6.007223585	-9.876512672	3.98E-06	1.34E-05	4.723030993
GGT6	-2.989657196	5.754563535	-7.632122795	3.22E-05	7.61E-05	2.491863795
GH1	-2.126779544	4.867863215	-14.35752302	1.65E-07	1.37E-06	8.049465091
GHDC	-2.493028281	6.776345902	-9.655778505	4.80E-06	1.56E-05	4.52408245
GHRHR	-2.125640861	5.142297416	-12.10733047	7.15E-07	3.62E-06	6.53078226
GHRL	-2.607355337	5.30070989	-11.02723077	1.58E-06	6.47E-06	5.698759678
GIF	-3.329730155	4.248637699	-15.34249298	9.30E-08	9.95E-07	8.637749362
GINM1	-3.215342892	8.372203229	-8.18384725	1.85E-05	4.76E-05	3.0863065
GIP	-2.478851185	4.655793392	-18.82404165	1.55E-08	4.47E-07	10.42562192
GIPC1	-2.853028281	8.953397699	-7.499793257	3.70E-05	8.55E-05	2.344304887
GIPC2	-2.564016836	3.800312138	-6.342797279	0.000134167	0.000261322	0.964805899
GIPR	-2.14702189	5.558454407	-12.52915184	5.34E-07	2.95E-06	6.836165871
GIT1	-2.73014869	8.455125571	-12.34455007	6.06E-07	3.23E-06	6.703796172
GJA10	-3.044443444	4.967745635	-18.87097198	1.52E-08	4.44E-07	10.44706399
GJA3	-2.854812095	4.742127679	-13.82333633	2.29E-07	1.68E-06	7.712259815
GJA4	-2.111294529	5.186923997	-11.48887359	1.12E-06	5.00E-06	6.063592118
GJA8	-2.441928418	6.262367128	-7.972387028	2.28E-05	5.69E-05	2.862346923
GJB2	-5.17799001	4.611887214	-4.007233257	0.003078338	0.004367828	-2.367984479
GJB3	-2.292006643	5.767398308	-8.169510397	1.87E-05	4.82E-05	3.071270466
GJB4	-3.116199681	5.667020498	-18.17783584	2.11E-08	4.81E-07	10.12384171
GJB5	-3.278491035	5.435751398	-7.313508774	4.51E-05	0.00010126	2.133178777
GJB6	-2.734742675	4.009385078	-3.95500109	0.003331133	0.004697522	-2.45090512
GJD2	-2.360214328	6.061461154	-12.95596738	4.01E-07	2.41E-06	7.134884041
GJD3	-2.124967699	6.099305078	-12.22964491	6.57E-07	3.41E-06	6.620405748
GK2	-2.618629218	4.647161835	-12.28611812	6.31E-07	3.33E-06	6.661486795
GK3P	-2.343236223	6.016330409	-3.845704723	0.003934012	0.005479708	-2.625404078
GKN2	-2.864314688	5.23930649	-17.95217228	2.36E-08	5.10E-07	10.01550127
GLB1L	-3.458156983	5.951879875	-10.77479804	1.92E-06	7.52E-06	5.493086517
GLB1L2	-2.595749624	7.522830401	-10.49504985	2.39E-06	8.91E-06	5.259819111
GLDN	-2.265855639	5.569628226	-17.13662569	3.54E-08	6.08E-07	9.610493853
GLI1	-2.587404337	5.90197536	-9.128873722	7.61E-06	2.27E-05	4.032415853
GLIPR1	-4.13679746	5.454942351	-4.201149546	0.002304127	0.00335493	-2.062961109
GLIS1	-2.603111799	5.205226007	-8.28358346	1.68E-05	4.39E-05	3.190318644
GLIS3	-4.295573117	4.728899324	-6.89517594	7.11E-05	0.000149914	1.644064921
GLIS3-AS1	-2.290717797	5.089278646	-10.39375184	2.60E-06	9.48E-06	5.17392684
GLP2R	-2.387426798	4.437625836	-15.74831975	7.41E-08	8.76E-07	8.868389197
GLRA2	-2.373989312	5.833883989	-9.307967362	6.49E-06	1.99E-05	4.202256175
GLRB	-2.566501917	5.348456955	-4.516662714	0.001454717	0.002208359	-1.576848054
GLT1D1	-2.216511605	5.711133922	-7.380108523	4.20E-05	9.53E-05	2.209122113
GLT8D2	-3.043265433	5.293127628	-7.46859459	3.82E-05	8.79E-05	2.309225265
GLTP	-2.139389423	8.675247607	-8.784113304	1.04E-05	2.95E-05	3.697230724
GLUL	-2.794923041	8.507784238	-4.420921327	0.001670037	0.002498705	-1.722972458
GLYAT	-2.117905713	4.493744093	-19.53015762	1.12E-08	4.17E-07	10.74172905
GLYCTK-AS1	-2.992073829	5.152960952	-13.46527459	2.88E-07	1.93E-06	7.478549675
GLYR1	-2.121218762	7.356725361	-7.273242666	4.70E-05	0.000105001	2.087011395
GM2A	-2.625340749	6.333654323	-11.42171583	1.17E-06	5.16E-06	6.011399609
GMDS	-3.120820046	6.392281218	-7.999927106	2.22E-05	5.56E-05	2.891782789
GML	-2.524242061	4.910156311	-10.98144693	1.64E-06	6.63E-06	5.661788394
GMNC	-3.013563541	4.79621696	-15.05570124	1.10E-07	1.09E-06	8.470733417
GMPR	-2.925783186	5.624563744	-9.179290611	7.28E-06	2.18E-05	4.080518095
GMPR2	-2.263956991	9.157382596	-6.109586049	0.000177367	0.000333158	0.666050733
GNA14	-3.392953149	5.14982171	-6.70755409	8.79E-05	0.000179704	1.417719441
GNAI2	-2.53097768	8.379917749	-3.947441635	0.003369505	0.004747707	-2.462931786
GNAL	-4.170049331	4.587358858	-7.298774022	4.58E-05	0.000102643	2.116306673
GNAT2	-2.342968683	4.763181383	-12.6629927	4.88E-07	2.76E-06	6.930924933
GNG13	-2.297584173	4.221339636	-10.84456949	1.82E-06	7.21E-06	5.550383482
GNGT1	-2.195941306	3.716092842	-3.769530619	0.004421761	0.006110422	-2.747774124
GNN	-2.569667834	4.54112034	-20.21951652	8.28E-09	3.85E-07	11.03741408
GNPTAB	-2.115786541	6.602616762	-10.26114925	2.89E-06	1.03E-05	5.060318075
GNRHR2	-2.212620998	4.985961802	-12.44534411	5.66E-07	3.08E-06	6.776313574
[truncated: 3,493 more rows]
